# Supplementary material for: Cobalt(iii)-catalyzed C–H amidation of N,N-dialkyl thiobenzamides by sulfur coordination
Source: Royal Society of Chemistry journal article supplement (doi:10.1039/d1ob02034j), 2021-01-01

# Cobalt(III)-Catalyzed C-H Amidation of *N,N*-Dialkyl Thiobenzamides by Sulfur Coordination

## (Supporting Information)

Pengpeng Gao,<sup>‡,a</sup> Xiaohui Zhang,<sup>‡,a</sup> and Qing-Zhong Zheng<sup>\*,a,b</sup>

<sup>a</sup>State Key Laboratory of High-efficiency Utilization of Coal and Green Chemical Engineering, National Demonstration Center for Experimental Chemistry Education, School of Chemistry and Chemical Engineering, Ningxia University, Yinchuan 750021, China

<sup>b</sup>State Key Laboratory of Natural and Biomimetic Drugs, School of Pharmaceutical Sciences, Peking University, Xue Yuan Rd. 38, Beijing 100191, China

E-mail: qzzheng@nxu.edu.cn

## Table of Contents

|                                                                                         |         |
|-----------------------------------------------------------------------------------------|---------|
| 1. General remarks                                                                      | S2      |
| 2. Preparation of substrates                                                            | S3      |
| 3. Experimental procedure and characterization data                                     | S4-S22  |
| 4. Structural modification of Adapalene                                                 | S23     |
| 5. Gram-scale reaction                                                                  | S24     |
| 6. Transformation of amidated product                                                   | S24-S25 |
| 7. Mechanism studies                                                                    | S26-S29 |
| 8. References                                                                           | S30     |
| 9. <sup>1</sup> H NMR, <sup>13</sup> C NMR and <sup>19</sup> F NMR spectra for products | S31-S97 |

## 1. General remarks

All manipulations were conducted with sealed tubes.  $^1\text{H}$ -NMR spectra were recorded on a Bruker AVIII-400 spectrometers. Chemical shifts (in ppm) were calibrated with Chloroform-d.  $^{13}\text{C}$ -NMR spectra were obtained by using the same NMR spectrometers and were calibrated with Chloroform-d. Unless otherwise noted, materials obtained from commercial suppliers were used without further purification.

## 2. Preparation of substrates

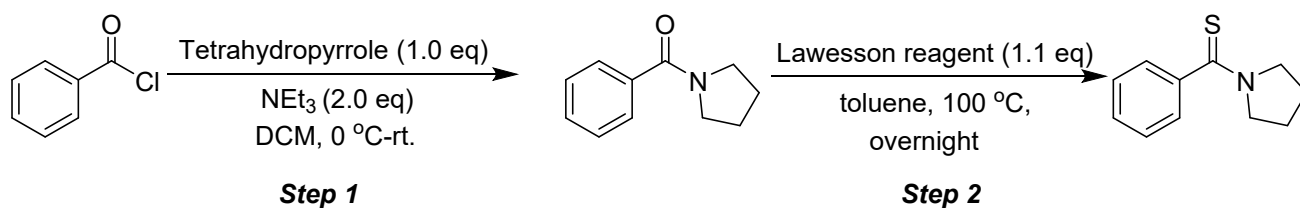

**Step 1:** The solution of tetrahydropyrrole (10 mmol, 0.8 mL) and NEt<sub>3</sub> (20 mol, 2.8 mL) was dissolved in 50 mL dry DCM; and moved to an ice-bath, to this mixture was added the Benzoyl chloride slowly. After addition, the reaction was taken out of the ice-bath, and keeping stirring at 25 °C overnight. Then the reaction was quenched by the saturated sodium bicarbonate and extracted with DCM (50 mL × 2). The combined organic phase was washed with brine and dried over Na<sub>2</sub>SO<sub>4</sub> and the solvent was removed under vacuum. The crude product can be used without further purification.<sup>[1]</sup>

**Step 2:** The crude product and Lawesson reagent (11 mmol, 4.45 g) was dissolved in 50 mL toluene. Then the reaction was transformed to a preheated oil bath and stirring at 100 °C overnight. Cool down to r.t and concentrated in vacuum. The resulting oil was purified by column chromatography on silica gel (Petroleum ether /ethyl acetate = 20:1) affording **1** as yellow solid.<sup>[2]</sup>

### 3. Experimental procedure and characterization data

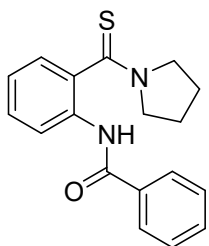

**3a**

1) *N*-(2-(pyrrolidine-1-carbonothioyl)phenyl)benzamide (**3a**). The reaction of phenyl(pyrrolidin-1-yl)methanethione (**1a**) (0.2 mmol, 38.3 mg), 3-phenyl-1,4,2-dioxazol-5-one (**2a**) (0.24 mmol, 39.1 mg), Cp\*Co(CO)I<sub>2</sub> (4.8 mg, 0.01 mmol), AgSbF<sub>6</sub> (13.8 mg, 0.04 mmol), PhCO<sub>2</sub>Na (7.2 mg, 0.04 mmol), and DCE (2 mL) were stirred at 40 °C for 12 h in Ar as monitored by TLC. The resulting mixture was concentrated and purified by flash chromatography on silica gel to **3a**; Yellow solid, 55.4 mg, yield: 89%. <sup>1</sup>H NMR (400 MHz, CDCl<sub>3</sub>) δ 9.81 (s, 1H), 8.33 (d, *J* = 8.0 Hz, 1H), 7.94 (d, *J* = 8.0 Hz, 2H), 7.56 -7.37(m, 4H), 7.49 (dd, *J* = 13.2, 7.6 Hz, 2H), 7.41-7.37 (m, 4H), 7.17-7.12 (m, 2H), 3.96 (t, *J* = 8.4 Hz, 2H), 3.53 (d, *J* = 8.0 Hz, 1H), 3.34 (s, 1H), 2.07-1.87 (m, 4H) ppm. <sup>13</sup>C NMR (100 MHz, CDCl<sub>3</sub>) δ 193.2, 165.1, 134.3, 133.6, 133.4, 132.0, 129.6, 128.8, 127.3, 124.9, 124.1, 123.4, 54.1, 53.1, 26.2, 24.4 ppm. HRMS *m/z* (ESI): calcd. for C<sub>18</sub>H<sub>18</sub>N<sub>2</sub>OSNa [M+Na]<sup>+</sup> 333.1032, found: 333.1030.

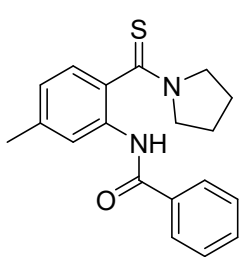

**3b**

2) *N*-(5-methyl-2-(pyrrolidine-1-carbonothioyl)phenyl)benzamide (**3b**). The reaction of pyrrolidin-1-yl(*p*-tolyl)methanethione (**1b**) (0.2 mmol, 41.1 mg), 3-phenyl-1,4,2-dioxazol-5-one (**2a**) (0.24 mmol, 39.1 mg), Cp\*Co(CO)I<sub>2</sub> (4.8 mg, 0.01 mmol), AgSbF<sub>6</sub> (13.8 mg, 0.04 mmol), PhCO<sub>2</sub>Na (7.2 mg, 0.04 mmol), and DCE (2 mL)

were stirred at 40 °C for 12 h in Ar as monitored by TLC. The resulting mixture was concentrated and purified by flash chromatography on silica gel to **3b**;

Yellow solid, 60.2 mg, yield: 91%.  $^1\text{H NMR}$  (400 MHz,  $\text{CDCl}_3$ )  $\delta$  9.92 (s, 1H), 8.19 (s, 1H), 7.95 (d,  $J = 8.0$  Hz, 2H), 7.56-7.47 (m, 3H), 6.99 (d,  $J = 19.6, 7.6$  Hz, 2H), 3.96 (s, 2H), 3.55 (s, 1H), 3.39 (s, 1H), 2.39 (s, 3H), 2.06-1.88 (m, 4H) ppm.  $^{13}\text{C NMR}$  (100 MHz,  $\text{CDCl}_3$ )  $\delta$  193.4, 165.0, 140.0, 134.3, 133.4, 131.9, 130.7, 128.7, 127.3, 124.8, 124.8, 123.8, 54.1, 53.1, 26.2, 24.4, 21.5 ppm. **HRMS  $m/z$  (ESI):** calcd. for  $\text{C}_{19}\text{H}_{20}\text{N}_2\text{OSNa}$   $[\text{M}+\text{Na}]^+$  347.1189, found: 347.1189.

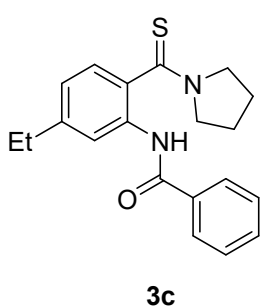

**3) *N*-(5-ethyl-2-(pyrrolidine-1-carbonothioyl)phenyl)benzamide (3c).**

The reaction of (4-ethylphenyl)(pyrrolidin-1-yl)methanethione (**1c**) (0.2 mmol, 43.9 mg), 3-phenyl-1,4,2-dioxazol-5-one (**2a**) (0.24 mmol, 39.1 mg),  $\text{Cp}^*\text{Co}(\text{CO})\text{I}_2$  (4.8 mg, 0.01 mmol),

$\text{AgSbF}_6$  (13.8 mg, 0.04 mmol),  $\text{PhCO}_2\text{Na}$  (7.2 mg, 0.04 mmol), and DCE (2 mL) were stirred at 40 °C for 12 h in Ar as monitored by TLC. The resulting mixture was concentrated and purified by flash chromatography on silica gel to **3c**; Yellow oil, 39.7 mg, yield: 59%.  $^1\text{H NMR}$  (400 MHz,  $\text{CDCl}_3$ )  $\delta$  9.95 (s, 1H), 8.22 (s, 1H), 7.95 (t,  $J = 3.2$  Hz, 2H), 7.55-7.47 (m, 3H), 7.06-6.97 (m, 2H), 3.96 (t,  $J = 7.2$  Hz, 2H), 3.56 (s, 1H), 3.40 (s, 1H), 2.69 (d,  $J = 7.6$  Hz, 2H), 2.07-1.88 (m, 4H), 1.28-1.25 (m, 3H) ppm.  $^{13}\text{C NMR}$  (100 MHz,  $\text{CDCl}_3$ )  $\delta$  193.6, 165.1, 146.3, 134.4, 133.6, 131.9, 131.0, 128.8, 127.3, 124.9, 123.6, 122.8, 54.2, 53.1, 28.9, 26.2, 24.5, 15.3 ppm. **HRMS  $m/z$  (ESI):** calcd. for  $\text{C}_{20}\text{H}_{22}\text{N}_2\text{OSNa}$   $[\text{M}+\text{Na}]^+$  361.1345, found: 361.1335.

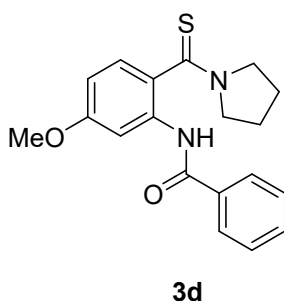

**4) *N*-(5-methoxy-2-(pyrrolidine-1-carbonothioyl)phenyl)-**

### benzamide (3d).

The reaction of (4-methoxyphenyl)(pyrrolidin-1-yl) methanethione (**1d**) (0.2 mmol, 44.3 mg), 3-phenyl-1,4,2- dioxazol-5-one (**2a**) (0.24 mmol, 39.1 mg), Cp\*Co(CO)I<sub>2</sub> (4.8 mg, 0.01 mmol), AgSbF<sub>6</sub> (13.8 mg, 0.04 mmol), PhCO<sub>2</sub>Na (7.2 mg, 0.04 mmol), and DCE (2 mL) were stirred at 40 °C for 12 h in Ar as monitored by TLC. The resulting mixture was concentrated and purified by flash chromatography on silica gel to **3d**; Yellow oil, 18.7 mg, yield: 27%. <sup>1</sup>H NMR (400 MHz, CDCl<sub>3</sub>) δ 10.29 (s, 1H), 8.09 (d, *J* = 2.8 Hz, 1H), 7.97 (d, *J* = 3.2 Hz, 2H), 7.57-7.47 (m, 3H), 7.04 (d, *J* = 8.8 Hz, 1H), 6.68 (dd, *J* = 8.2, 5.6 Hz, 2H), 3.97 (d, *J* = 7.2 Hz, 2H), 3.88 (d, *J* = 10 Hz, 3H), 3.56-3.45 (m, 2H), 3.07-1.94 (m, 4H) ppm. <sup>13</sup>C NMR (100 MHz, CDCl<sub>3</sub>) δ 193.1, 165.2, 160.4, 135.7, 134.3, 132.0, 128.8, 127.3, 126.3, 125.2, 110.6, 107.3, 55.5, 54.4, 53.3, 26.2, 24.5 ppm. HRMS *m/z* (ESI): calcd. for C<sub>19</sub>H<sub>20</sub>N<sub>2</sub>O<sub>2</sub>SNa [M+Na]<sup>+</sup> 363.1138, found: 363.1132.

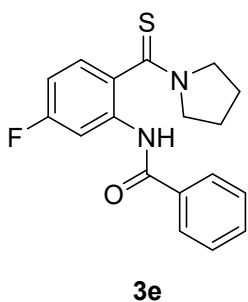

### 5) *N*-(5-fluoro-2-(pyrrolidine-1-carbonothioyl)phenyl)benz-

**amide (3e).** The reaction of (4-fluorophenyl) (pyrrolidin-1-yl) methanethione (**1e**) (0.2 mmol, 41.2 mg), 3-phenyl-1,4,2- dioxazol-5-one (**2a**) (0.24 mmol, 39.1 mg), Cp\*Co(CO)I<sub>2</sub> (4.8 mg, 0.01

mmol), AgSbF<sub>6</sub> (13.8 mg, 0.04 mmol), PhCO<sub>2</sub>Na (7.2 mg, 0.04 mmol), and DCE (2 mL) were stirred at 40 °C for 12 h in Ar as monitored by TLC. The resulting mixture was concentrated and purified by flash chromatography on silica gel to **3e**; Yellow oil, 57.6 mg, yield: 88 %. <sup>1</sup>H NMR (400 MHz, CDCl<sub>3</sub>) δ 10.08 (s, 1H), 8.26 (dd, *J* = 2.4, 9.2 Hz, 1H), 7.94 (d, *J* = 7.2 Hz, 2H), 7.58-7.48 (m, 3H), 7.10 (dd, *J* = 6.4, 2.0 Hz, 1H), 6.87-6.82 (m, 1H), 3.98 (s, 2H), 3.55 (s, 1H), 3.37 (s,

1H), 2.08-1.91 (m, 4H) ppm.  $^{13}\text{C}$  NMR (100 MHz,  $\text{CDCl}_3$ )  $\delta$  192.4, 165.1, 162.7 (d,  $^1J_{\text{C-F}} = 246.5$  Hz), 135.8 (d,  $^3J_{\text{C-F}} = 11.7$  Hz), 134.0, 132.2, 128.8, 128.6 (d,  $^4J_{\text{C-F}} = 2.9$  Hz), 127.3, 126.4 (d,  $^3J_{\text{C-F}} = 9.4$  Hz), 110.7 (d,  $^2J_{\text{C-F}} = 22.2$  Hz), 110.2 (d,  $^2J_{\text{C-F}} = 27.0$  Hz), 54.3, 53.3, 26.2, 24.4 ppm.  $^{19}\text{F}$  NMR (377 MHz,  $\text{CDCl}_3$ )  $\delta$  -109.3 ppm (reference:  $\text{PhCF}_3$ ). HRMS m/z (ESI): calcd. for  $\text{C}_{18}\text{H}_{17}\text{N}_2\text{FOSNa}$   $[\text{M}+\text{Na}]^+$  351.0938, found: 351.0938.

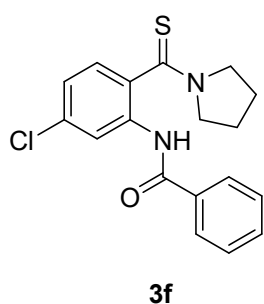

**6) N-(5-chloro-2-(pyrrolidine-1-carbonothioyl)phenyl)benzamide (3f).**

The reaction of (4-chlorophenyl) (pyrrolidin-1-yl) methanethione (**1f**) (0.2 mmol, 45.0 mg), 3-phenyl-1,4,2-dioxazol-5-one (**2a**) (0.24 mmol, 39.1 mg),  $\text{Cp}^*\text{Co}(\text{CO})\text{I}_2$  (4.8 mg, 0.01 mmol),  $\text{AgSbF}_6$  (13.8 mg, 0.04 mmol),  $\text{PhCO}_2\text{Na}$  (7.2 mg, 0.04 mmol), and DCE (2 mL) were stirred at 40 °C for 12 h in Ar as monitored by TLC. The resulting mixture was concentrated and purified by flash chromatography on silica gel to **3f**; Yellow oil, 55.3 mg, yield: 80 %.  $^1\text{H}$  NMR (400 MHz,  $\text{CDCl}_3$ )  $\delta$  9.93 (s, 1H), 8.49 (s, 1H), 7.93 (dd,  $J = 3.6, 2.0$  Hz, 2H), 7.58-7.48 (m, 3H), 7.14-7.05 (m, 2H), 3.97 (s, 2H), 3.54 (s, 1H), 3.37 (s, 1H), 2.10-1.91 (m, 4H) ppm.  $^{13}\text{C}$  NMR (100 MHz,  $\text{CDCl}_3$ )  $\delta$  192.2, 165.0, 135.4, 134.9, 133.9, 132.2, 131.1, 128.9, 127.4, 125.9, 124.0, 123.1, 54.2, 53.2, 26.3, 24.4 ppm. HRMS m/z (ESI): calcd. for  $\text{C}_{18}\text{H}_{17}\text{N}_2\text{ClOSNa}$   $[\text{M}+\text{Na}]^+$  367.0642, found: 367.0630.

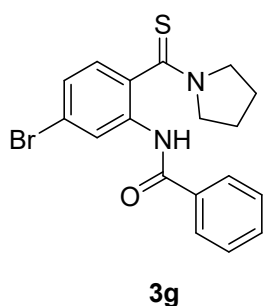

**7) N-(5-bromo-2-(pyrrolidine-1-carbonothioyl)phenyl)benzamide (3g).**

The reaction of (4-bromophenyl) (pyrrolidin-1-yl) methanethione (**1g**) (0.2 mmol, 54.0 mg), 3-phenyl-1,4,2-

dioxazol-5-one (**2a**) (0.24 mmol, 39.1 mg), Cp\*Co(CO)I<sub>2</sub> (4.8 mg, 0.01 mmol), AgSbF<sub>6</sub> (13.8 mg, 0.04 mmol), PhCO<sub>2</sub>Na (7.2 mg, 0.04 mmol), and DCE (2 mL) were stirred at 40 °C for 12 h in Ar as monitored by TLC. The resulting mixture was concentrated and purified by flash chromatography on silica gel to **3g**; Yellow oil, 44 mg, yield: 56%. <sup>1</sup>H NMR (400 MHz, CDCl<sub>3</sub>) δ 9.90 (s, 1H), 8.64 (s, 1H), 7.93 (d, *J* = 7.2 Hz, 2H), 7.58-7.48 (m, 3H), 7.28 (dd, *J* = 6.4, 1.3 Hz, 2H), 7.00 (d, *J* = 8.0 Hz, 2H), 3.96 (s, 2H), 3.53 (s, 1H), 3.37 (s, 1H), 2.08-1.89 (m, 4H) ppm. <sup>13</sup>C NMR (100 MHz, CDCl<sub>3</sub>) δ 192.0, 165.0, 134.9, 133.8, 132.2, 131.4, 128.8, 127.3, 127.0, 126.1, 125.9, 123.4, 54.2, 53.2, 26.2, 24.4 ppm. HRMS *m/z* (ESI): calcd. for C<sub>18</sub>H<sub>18</sub>N<sub>2</sub>BrOS [M+H]<sup>+</sup> 389.0318, found: 389.0318.

#### 8) *N*-(2-(pyrrolidine-1-carbonothioyl)-5-

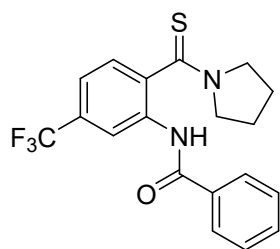

**3h**

(trifluoromethyl)phenyl)benzamide (**3h**). The reaction of pyrrolidin-1-yl (4-(trifluoromethyl)phenyl) methanethione (**1h**) (0.2 mmol, 51.8 mg), 3-phenyl-1,4,2-dioxazol-5-one (**2a**) (0.24 mmol, 39.1 mg), Cp\*Co(CO)I<sub>2</sub> (4.8 mg, 0.01 mmol), AgSbF<sub>6</sub>

(13.8 mg, 0.04 mmol), PhCO<sub>2</sub>Na (7.2 mg, 0.04 mmol), and DCE (2 mL) were stirred at 40 °C for 12 h in Ar as monitored by TLC. The resulting mixture was concentrated and purified by flash chromatography on silica gel to **3h**; Yellow oil, 37.9 mg, yield: 50%. <sup>1</sup>H NMR (400 MHz, CDCl<sub>3</sub>) δ 9.81 (s, 1H), 8.75 (s, 1H), 7.94 (d, *J* = 7.2 Hz, 2H), 7.60-7.50 (m, 3H), 7.41 (d, *J* = 7.6 Hz, 1H), 7.25 (s, 1H), 3.99 (dd, *J* = 12.4, 5.6 Hz, 2H), 3.54 (s, 1H), 3.34 (s, 1H), 2.12-1.90 (m, 4H) ppm. <sup>13</sup>C NMR (100 MHz, CDCl<sub>3</sub>) δ 191.6, 165.2, 135.8, 134.2, 133.8, 132.3, 131.4, 128.9, 127.3, 125.4, 122.2, 120.8 (q, <sup>3</sup>*J*<sub>C-F</sub> = 3.7 Hz), 120.3 (q, <sup>3</sup>*J*<sub>C-F</sub> = 3.2 Hz), 54.1,



53.2, 26.3, 24.4 ppm.  $^{19}\text{F}$  NMR (377 MHz,  $\text{CDCl}_3$ )  $\delta$  -63.4 ppm (reference:  $\text{PhCF}_3$ ). HRMS  $m/z$  (ESI): calcd. For  $\text{C}_{19}\text{H}_{17}\text{N}_2\text{F}_3\text{BrOSNa}$   $[\text{M}+\text{Na}]^+$  401.0906, found: 401.0904.

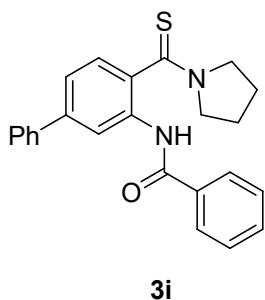

**9) *N*-(4-(pyrrolidine-1-carbonothioyl)-[1,1'-biphenyl]-3-yl)-**

**benzamide (3i).** The reaction of [1,1'-biphenyl]-4-yl(pyrrolidin-1-yl) methanethione (**1i**) (0.2 mmol, 53.5 mg), 3-phenyl-1,4,2-dioxazol-5-one (**2a**) (0.24 mmol, 39.1 mg),  $\text{Cp}^*\text{Co}(\text{CO})\text{I}_2$  (4.8 mg, 0.01 mmol),  $\text{AgSbF}_6$  (13.8 mg, 0.04 mmol),  $\text{PhCO}_2\text{Na}$  (7.2 mg,

0.04 mmol), and DCE (2 mL) were stirred at 40 °C for 12 h in Ar as monitored by TLC. The resulting mixture was concentrated and purified by flash chromatography on silica gel to **3i**; Yellow oil, 50.2 mg, yield: 65%.  $^1\text{H}$  NMR (400 MHz,  $\text{CDCl}_3$ )  $\delta$  9.98 (s, 1H), 8.65 (s, 1H), 7.88 (d,  $J = 6.8$  Hz, 2H), 7.67 (d,  $J = 1.2$  Hz, 2H), 7.58-7.35 (m, 7H), 7.20 (d,  $J = 8.0$  Hz, 1H), 4.00 (d,  $J = 6.4$  Hz, 2H), 3.61 (s, 1H), 3.46 (s, 1H), 2.08-1.90 (m, 4H) ppm.  $^{13}\text{C}$  NMR (100 MHz,  $\text{CDCl}_3$ )  $\delta$  193.1, 165.1, 142.6, 140.0, 143.3, 134.0, 132.0, 128.8, 127.8, 127.3, 127.2, 125.4, 122.6, 122.0, 54.2, 53.1, 26.2, 24.4 ppm. HRMS  $m/z$  (ESI): calcd. for  $\text{C}_{24}\text{H}_{22}\text{N}_2\text{OS}$   $[\text{M}+\text{H}]^+$  387.1526, found: 387.1515.

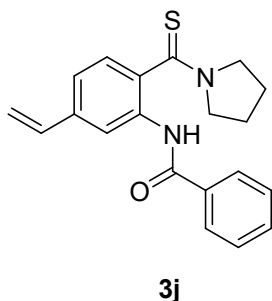

**10) *N*-(2-(pyrrolidine-1-carbonothioyl)-5-**

**vinylphenyl)benzamide (3j).** The reaction of pyrrolidin-1-yl (4-vinylphenyl) methanethione (**1j**) (0.2 mmol, 43.5 mg), 3-phenyl-1,4,2-dioxazol-5-one (**2a**) (0.24 mmol, 39.1 mg),

$\text{Cp}^*\text{Co}(\text{CO})\text{I}_2$  (4.8 mg, 0.01 mmol),  $\text{AgSbF}_6$  (13.8 mg, 0.04 mmol),  $\text{PhCO}_2\text{Na}$  (7.2 mg, 0.04 mmol), and DCE (2 mL) were stirred at 40 °C for 12 h in Ar as

monitored by TLC. The resulting mixture was concentrated and purified by flash chromatography on silica gel to **3j**; Yellow oil, 29.9 mg, yield: 44%. **<sup>1</sup>H NMR (400 MHz, CDCl<sub>3</sub>)**  $\delta$  9.92 (s, 1H), 8.44 (s, 1H), 7.96 (d,  $J = 7.6$  Hz, 2H), 7.57-7.48 (m, 3H), 7.20 (d,  $J = 8.0$  Hz, 1H), 7.09 (d,  $J = 8.0$  Hz, 1H), 6.77-6.70 (m, 1H), 5.84 (d,  $J = 7.6$  Hz, 1H), 5.34 (d,  $J = 7.6$  Hz, 1H), 3.97 (s, 2H), 3.56 (s, 1H), 3.40 (s, 1H), 2.07-1.89 (m, 4H) ppm. **<sup>13</sup>C NMR (100 MHz, CDCl<sub>3</sub>)**  $\delta$  193.1, 165.1, 139.1, 136.0, 134.3, 134.0, 132.4, 132.0, 128.8, 127.3, 125.2, 121.7, 121.1, 115.6, 54.1, 53.1, 26.2, 24.4 ppm. **HRMS m/z (ESI)**: calcd. for C<sub>20</sub>H<sub>21</sub>N<sub>2</sub>OS [M+H]<sup>+</sup> 337.1369, found: 337.1358.

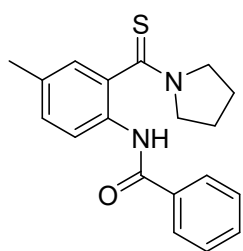

**3k**

**11) *N*-(4-methyl-2-(pyrrolidine-1-carbonothioyl)phenyl)benzamide(3k).**

The reaction of pyrrolidin-1-yl(m-tolyl)methanethione (**1k**) (0.2 mmol, 41.1 mg), 3-phenyl-1,4,2-dioxazol-5-one (**2a**) (0.24 mmol, 39.1 mg), Cp\*Co(CO)I<sub>2</sub> (4.8 mg, 0.01 mmol), AgSbF<sub>6</sub> (13.8

mg, 0.04 mmol), PhCO<sub>2</sub>Na (7.2 mg, 0.04 mmol), and DCE (2 mL) were stirred at 40 °C for 12 h in Ar as monitored by TLC. The resulting mixture was concentrated and purified by flash chromatography on silica gel to **3k**; Yellow oil, 48.7 mg, yield: 75%. **<sup>1</sup>H NMR (400 MHz, CDCl<sub>3</sub>)**  $\delta$  9.56 (s, 1H), 8.16 (d,  $J = 8.4$  Hz, 1H), 7.93 (d,  $J = 7.6$  Hz, 2H), 7.54-7.46 (m, 3H), 7.20 (d,  $J = 7.6$  Hz, 1H), 6.94 (s, 1H), 3.96 (s, 2H), 3.54 (s, 1H), 3.37 (s, 1H), 2.33 (s, 3H), 2.08-1.87 (m, 4H) ppm. **<sup>13</sup>C NMR (100 MHz, CDCl<sub>3</sub>)**  $\delta$  193.3, 165.0, 134.3, 134.1, 133.8, 131.9, 130.6, 130.3, 128.7, 127.2, 125.1, 123.6, 54.0, 53.0, 26.2, 24.4, 20.9 ppm. **HRMS m/z (ESI)**: calcd. for C<sub>19</sub>H<sub>21</sub>N<sub>2</sub>OS [M+H]<sup>+</sup> 325.1369, found: 325.1360.

**12) *N*-(2-(pyrrolidine-1-carbonothioyl)-4-(trifluoromethyl)phenyl)benzamide (3l).**

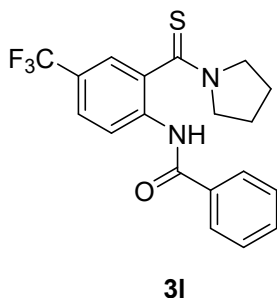

The reaction of pyrrolidin-1-yl(3-(trifluoromethyl)phenyl)

methanethione (**1l**) (0.2 mmol, 51.8 mg), 3-phenyl-1,4,2-

dioxazol-5-one (**2a**) (0.24 mmol, 39.1 mg), Cp\*Co(CO)I<sub>2</sub> (4.8

mg, 0.01 mmol), AgSbF<sub>6</sub> (13.8 mg, 0.04 mmol), PhCO<sub>2</sub>Na (7.2

mg, 0.04 mmol), and DCE (2 mL) were stirred at 40 °C for 12 h in Ar as monitored by TLC. The resulting mixture was concentrated and purified by flash

chromatography on silica gel to **3l**; Yellow oil, 14.4 mg, yield: 19%. <sup>1</sup>H NMR (400

MHz, CDCl<sub>3</sub>) δ 9.90 (s, 1H), 8.64 (s, 1H), 7.94-7.92 (m, 2H), 7.58-7.48 (m, 3H),

7.30-7.26 (m, 1H), 7.00 (d, *J* = 8.4 Hz, 1H), 3.96 (s, 2H), 3.53 (s, 1H), 3.36 (s, 1H),

2.08-1.89 (m, 4H) ppm. <sup>13</sup>C NMR (100 MHz, CDCl<sub>3</sub>) δ 192.1, 165.0, 134.9, 133.9,

132.2, 130.2 (q, <sup>1</sup>*J*<sub>C-F</sub> = 270.0 Hz), 126.7 (q, <sup>2</sup>*J*<sub>C-F</sub> = 35.2 Hz), 126.1, 126.0, 123.4,

54.2, 53.2, 26.2, 24.4 ppm. <sup>19</sup>F NMR (377 MHz, CDCl<sub>3</sub>) δ -62.6 ppm (reference:

PhCF<sub>3</sub>). HRMS *m/z* (ESI): calcd. for C<sub>19</sub>H<sub>21</sub>N<sub>2</sub>OS [M+H]<sup>+</sup> 379.1086, found:

379.1082.

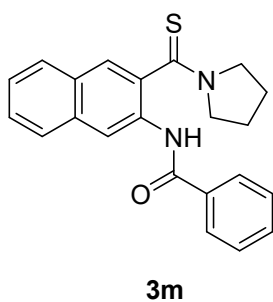

**13) N-(3-(pyrrolidine-1-carbonothioyl)naphthalen-2-yl)**

**-benzamide (3m)**. The reaction of naphthalen-2-yl (pyrrolidin-1-

yl) methanethione (**1m**) (0.2 mmol, 48.3 mg), 3-phenyl-1,4,2-

dioxazol-5-one (**2a**) (0.24 mmol, 39.1 mg), Cp\*Co(CO)I<sub>2</sub> (4.8

mg, 0.01 mmol), AgSbF<sub>6</sub> (13.8 mg, 0.04 mmol), PhCO<sub>2</sub>Na (7.2 mg, 0.04 mmol), and

DCE (2 mL) were stirred at 40 °C for 12 h in Ar as monitored by TLC. The resulting

mixture was concentrated and purified by flash chromatography on silica gel to **3m**;

Yellow solid, 53.8 mg, yield: 75%. <sup>1</sup>H NMR (400 MHz, CDCl<sub>3</sub>) δ 9.87 (s, 1H),

8.88 (s, 1H), 7.99 (d,  $J = 7.2$  Hz, 2H), 7.86 (d,  $J = 8.4$  Hz, 1H), 7.74 (d,  $J = 8.4$  Hz, 1H), 7.61-7.48 (m, 4H), 7.43 (t,  $J = 14.8$  Hz, 1H), 4.06-3.99 (m, 2H), 3.59 (t,  $J = 16.4$  Hz, 1H), 3.37-3.33 (m, 1H), 2.12-1.85 (m, 4H) ppm.  $^{13}\text{C}$  NMR (100 MHz,  $\text{CDCl}_3$ )  $\delta$  193.1, 165.2, 134.4, 133.7, 133.3, 132.0, 130.5, 129.7, 128.8, 128.0, 127.6, 127.3, 125.9, 124.2, 120.6, 54.3, 53.2, 26.2, 24.5 ppm. HRMS  $m/z$  (ESI): calcd. for  $\text{C}_{22}\text{H}_{21}\text{N}_2\text{OS}$   $[\text{M}+\text{H}]^+$  361.1369, found: 361.1360.

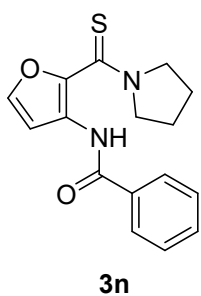

**14) *N*-(2-(pyrrolidin-1-carbonothioyl)furan-3-yl)benzamide(3n).**

The reaction of furan-2-yl(pyrrolidin-1-yl)methanethione (**1n**) (0.2 mmol, 36.2 mg), 3-phenyl-1,4,2-dioxazol-5-one (**2a**) (0.24 mmol, 39.1 mg),  $\text{Cp}^*\text{Co}(\text{CO})\text{I}_2$  (4.8 mg, 0.01 mmol),

$\text{AgSbF}_6$  (13.8 mg, 0.04 mmol),  $\text{PhCO}_2\text{Na}$  (7.2 mg, 0.04 mmol), and DCE (2 mL) were stirred at 40 °C for 12 h in Ar as monitored by TLC. The resulting mixture was concentrated and purified by flash chromatography on silica gel to **3n**; Yellow oil, 25.0 mg, yield: 42%.  $^1\text{H}$  NMR (400 MHz,  $\text{CDCl}_3$ )  $\delta$  12.59 (s, 1H), 8.09-8.07 (m, 2H), 7.74 (d,  $J = 2.0$  Hz, 1H), 7.56-7.39 (m, 3H), 7.39 (s, 1H), 4.11 (t,  $J = 18.0$  Hz, 2H), 4.01 (t,  $J = 17.6$  Hz, 2H), 2.10 (t,  $J = 8.4$  Hz, 2H), 2.01 (t,  $J = 13.6$  Hz, 3H) ppm.  $^{13}\text{C}$  NMR (100 MHz,  $\text{CDCl}_3$ )  $\delta$  177.2, 165.4, 141.8, 135.0, 133.8, 132.0, 128.7, 127.8, 108.1, 54.1, 53.7, 26.8, 23.5 ppm. HRMS  $m/z$  (ESI): calcd. for  $\text{C}_{16}\text{H}_{16}\text{N}_2\text{O}_2\text{SNa}$   $[\text{M}+\text{Na}]^+$  323.0825, found: 323.0814.

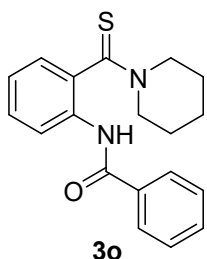

**15) 1-Phenyl-2-(2-(piperidine-1-carbonothioyl)phenyl)ethan-1-one (3o).** The reaction of phenyl(piperidin-1-yl)methanethione (**1o**) (0.2

mmol, 41.0 mg), 3-phenyl-1,4,2-dioxazol-5-one (**2a**) (0.24 mmol, 39.1 mg), Cp\*Co(CO)I<sub>2</sub> (4.8 mg, 0.01 mmol), AgSbF<sub>6</sub> (13.8 mg, 0.04 mmol), PhCO<sub>2</sub>Na (7.2 mg, 0.04 mmol), and DCE (2 mL) were stirred at 40 °C for 12 h in Ar as monitored by TLC. The resulting mixture was concentrated and purified by flash chromatography on silica gel to **3o**; Yellow oil, 21.4 mg, yield: 33%. <sup>1</sup>H NMR (400 MHz, CDCl<sub>3</sub>) δ 9.37 (s, 1H), 8.27 (d, *J* = 8.0 Hz, 1H), 7.93 (d, *J* = 7.6 Hz, 2H), 7.57-7.48 (m, 3H), 7.41-7.37 (m, 1H), 7.18-7.14 (m, 1H), 7.05 (dd, *J* = 6.4, 1.2 Hz, 1H), 4.42 (dd, *J* = 3.6, 2.8 Hz, 1H), 4.31 (s, 1H), 3.52-3.47 (m, 2H), 1.78-1.57 (m, 6H) ppm. <sup>13</sup>C NMR (100 MHz, CDCl<sub>3</sub>) δ 195.3, 165.0, 134.2, 133.6, 133.2, 132.0, 129.2, 128.8, 127.2, 124.4, 124.4, 123.8, 53.5, 50.2, 27.0, 25.7, 24.0 ppm. HRMS *m/z* (ESI): calcd. for C<sub>19</sub>H<sub>21</sub>N<sub>2</sub>OS [M+H]<sup>+</sup> 325.1369, found: 325.1369.

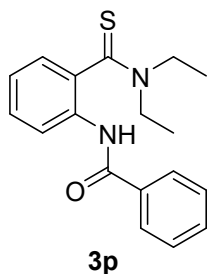

**16) *N,N*-diethyl-2-(2-oxo-2-phenylethyl)benzothioamide (**3p**).**

The reaction of *N,N*-diethylbenzothioamide (**1p**) (0.2 mmol, 38.7 mg), 3-phenyl-1,4,2-dioxazol-5-one (**2a**) (0.24 mmol, 39.1 mg), Cp\*Co(CO)I<sub>2</sub> (4.8 mg, 0.01 mmol), AgSbF<sub>6</sub> (13.8 mg, 0.04 mmol), PhCO<sub>2</sub>Na (7.2 mg, 0.04 mmol), and DCE (2 mL) were stirred at 40 °C for 12 h in Ar as monitored by TLC. The resulting mixture was concentrated and purified by flash chromatography on silica gel to **3o**; Yellow oil, 42.8 mg, yield: 69%. <sup>1</sup>H NMR (400 MHz, CDCl<sub>3</sub>) δ 9.14 (s, 1H), 8.23 (d, *J* = 8.4 Hz, 1H), 7.91 (d, *J* = 7.2 Hz, 2H), 7.56-7.49 (m, 3H), 7.39 (m, 1H), 7.17 (m, 1H), 7.07 (s, 1H), 4.15-4.11 (m, 2H), 3.42 (t, *J* = 14.0, 7.2 Hz, 2H), 1.35-1.32 (m, 3H), 1.10-1.07 (m, 3H) ppm. <sup>13</sup>C NMR (100 MHz, CDCl<sub>3</sub>) δ 196.4, 165.0, 134.3, 134.1, 132.6, 132.0, 129.1, 128.8, 127.1, 124.5, 124.3,

123.8, 48.3, 46.1, 13.6, 11.2 ppm. **HRMS m/z (ESI):** calcd. for C<sub>18</sub>H<sub>20</sub>N<sub>2</sub>OSNa [M+Na]<sup>+</sup> 335.1189, found: 335.1183.

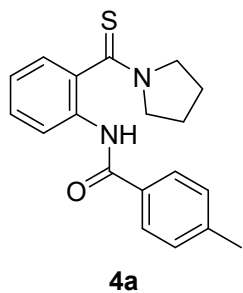

**4a**

**17) 4-Methyl-N-(2-(pyrrolidine-1-carbonothioyl)phenyl)benzamide (4a).**

The reaction of Phenyl(pyrrolidin-1-yl)methanethione (**1a**) (0.2 mmol, 38.3 mg), 3-(p-tolyl)-1,4,2-dioxazol-5-one (**2b**) (0.24 mmol, 42.5 mg), Cp\*Co(CO)I<sub>2</sub> (4.8 mg, 0.01 mmol), AgSbF<sub>6</sub>

(13.8 mg, 0.04 mmol), PhCO<sub>2</sub>Na (7.2 mg, 0.04 mmol), and DCE (2 mL) were stirred at 40 °C for 12 h in Ar as monitored by TLC. The resulting mixture was concentrated and purified by flash chromatography on silica gel to **4a**; Yellow oil, 43.5 mg, yield: 67%. **<sup>1</sup>H NMR (400 MHz, CDCl<sub>3</sub>)** δ 9.72 (s, 1H), 8.32 (d, *J* = 8.0 Hz, 1H), 7.83 (d, *J* = 8.0 Hz, 2H), 7.40-7.36 (m, 1H), 7.28 (d, *J* = 8.0 Hz, 2H), 7.15-7.11 (m, 2H), 3.95 (t, *J* = 8.0, 16.0 Hz, 2H), 3.53 (d, *J* = 7.6 Hz, 1H), 3.34 (s, 1H), 2.41 (s, 3H), 2.07-1.85 (m, 4H) ppm. **<sup>13</sup>C NMR (100 MHz, CDCl<sub>3</sub>)** δ 193.4, 165.1, 142.5, 133.6, 133.5, 131.5, 129.6, 129.5, 127.3, 124.9, 124.1, 123.5, 54.0, 53.0, 26.2, 24.4, 21.5 ppm.

**HRMS m/z (ESI):** calcd. for C<sub>19</sub>H<sub>20</sub>N<sub>2</sub>OSNa [M+Na]<sup>+</sup> 347.1189, found: 347.1174.

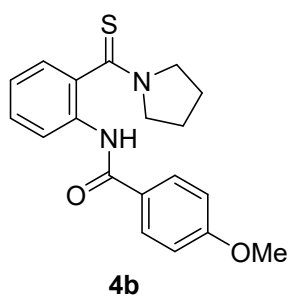

**4b**

**18) 4-Methoxy-N-(2-(pyrrolidine-1-carbonothioyl)phenyl)benzamide (4b).**

The reaction of phenyl(pyrrolidin-1-yl)methanethione (**1a**) (0.2 mmol, 38.3 mg), 3-(4-methoxyphenyl)-1,4,2-dioxazol-5-one (**2c**)

(0.24 mmol, 46.3 mg), Cp\*Co(CO)I<sub>2</sub> (4.8 mg, 0.01 mmol), AgSbF<sub>6</sub> (13.8 mg, 0.04 mmol), PhCO<sub>2</sub>Na (7.2 mg, 0.04 mmol), and DCE (2 mL) were stirred at 40 °C for 12 h in Ar as monitored by TLC. The resulting mixture was concentrated and purified by flash chromatography on silica gel to **4b**; Yellow oil, 61.0 mg, yield: 90%. **<sup>1</sup>H NMR**

(400 MHz, CDCl<sub>3</sub>)  $\delta$  9.69 (s, 1H), 8.33 (d,  $J$  = 8.4 Hz, 1H), 9.70 (s, 1H), 8.31 (d,  $J$  = 9.2 Hz, 1H), 7.93-7.89 (d, 2H), 7.41-7.36 (m, 1H), 7.15-7.12 (m, 2H), 7.00-6.96 (m, 2H), 3.97 (dd,  $J$  = 12 Hz, 4.8, 2H), 3.88 (d,  $J$  = 8.8 Hz, 3H), 3.54 (d,  $J$  = 7.6 Hz, 1H), 3.55 (s, 1H), 2.10-1.86 (m, 4H) ppm. <sup>13</sup>C NMR (100 MHz, CDCl<sub>3</sub>)  $\delta$  193.3, 164.7, 162.5, 133.5, 133.4, 129.5, 129.1, 126.5, 124.9, 123.8, 123.3, 113.9, 55.4, 54.0, 53.0, 26.2, 24.4 ppm. HRMS  $m/z$  (ESI): calcd. for C<sub>19</sub>H<sub>21</sub>N<sub>2</sub>O<sub>2</sub>S [M+H]<sup>+</sup> 341.1318, found: 341.1304.

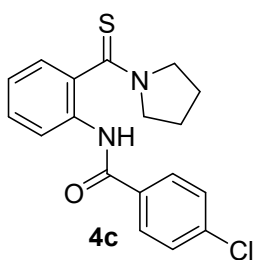

**19) 4-Chloro-*N*-(2-(pyrrolidine-1-carbonothioyl)phenyl)benz**

**-amide (4c).** The reaction of phenyl(pyrrolidin-1-yl)methanethione (**1a**) (0.2 mmol, 38.3 mg), 3-(4-chlorophenyl)-1,4,2-dioxazol-5-one (**2d**) (0.24 mmol, 47.4 mg), Cp\*Co(CO)I<sub>2</sub>

(4.8 mg, 0.01 mmol), AgSbF<sub>6</sub> (13.8 mg, 0.04 mmol), PhCO<sub>2</sub>Na (7.2 mg, 0.04 mmol), and DCE (2 mL) were stirred at 40 °C for 12 h in Ar as monitored by TLC. The resulting mixture was concentrated and purified by flash chromatography on silica gel to **4c**; Yellow oil, 25.8 mg, yield: 38%. <sup>1</sup>H NMR (400 MHz, CDCl<sub>3</sub>)  $\delta$  9.92 (s, 1H), 8.32 (d,  $J$  = 8.4 Hz, 1H), 7.89 (d,  $J$  = 8.4 Hz, 2H), 7.47-7.38 (m, 3H), 7.18-7.12 (m, 2H), 3.96 (t,  $J$  = 6.8 Hz, 2H), 3.55 (s, 1H), 3.37(s, 1H), 2.08-1.87 (m, 4H) ppm. <sup>13</sup>C NMR (100 MHz, CDCl<sub>3</sub>)  $\delta$  193.1, 164.0, 138.2, 133.4, 133.2, 132.7, 129.7, 128.7, 125.0, 124.2, 123.3, 54.2, 53.1, 26.2, 24.4 ppm. HRMS  $m/z$  (ESI): calcd. for C<sub>18</sub>H<sub>17</sub>N<sub>2</sub>ClOSNa [M+Na]<sup>+</sup> 367.0642, found: 367.0623.

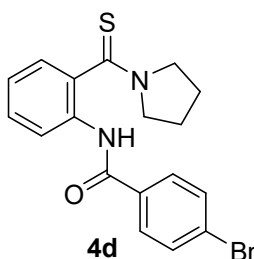

**20) 4-Bromo-*N*-(2-(pyrrolidine-1-carbonothioyl)phenyl)benz**

**-amide (4d).** The reaction of phenyl(pyrrolidin-1-yl)methanethione (**1a**) (0.2 mmol, 38.3 mg), 3-(4-bromophenyl)-1,4,2-dioxazol-5-one (**2e**) (0.24 mmol, 58.1 mg), Cp\*Co(CO)I<sub>2</sub> (4.8 mg, 0.01 mmol), AgSbF<sub>6</sub> (13.8 mg, 0.04 mmol), PhCO<sub>2</sub>Na (7.2 mg, 0.04 mmol), and DCE (2 mL) were stirred at 40 °C for 12 h in Ar as monitored by TLC. The resulting mixture was concentrated and purified by flash chromatography on silica gel to **4d**; Yellow oil, 54.1 mg, yield: 69%. <sup>1</sup>H NMR (400 MHz, CDCl<sub>3</sub>) δ 9.93 (s, 1H), 8.32 (d, *J* = 8.0 Hz, 1H), 7.81 (d, *J* = 8.4 Hz, 2H), 7.62 (d, *J* = 8.4 Hz, 2H), 7.42-7.38 (m, 1H), 7.17-7.12 (m, 2H), 3.96 (t, *J* = 6.8 Hz, 2H), 3.46 (d, *J* = 5.6 Hz, 1H), 3.36 (s, 1H), 2.07-1.89 (m, 4H) ppm. <sup>13</sup>C NMR (100 MHz, CDCl<sub>3</sub>) δ 193.0, 164.1, 133.3, 133.2, 133.1, 132.0, 129.7, 128.9, 126.7, 125.0, 124.2, 123.3, 54.2, 53.1, 26.2, 24.4 ppm. HRMS *m/z* (ESI): calcd. for C<sub>18</sub>H<sub>18</sub>BrN<sub>2</sub>O<sub>2</sub>S [M+H]<sup>+</sup> 389.0318, found: 389.0310.

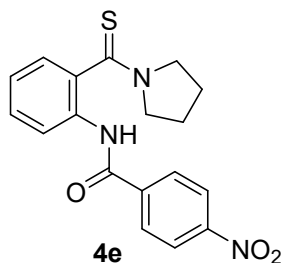

**21) 4-Nitro-N-(2-(pyrrolidin-1-carbonothioyl)phenyl)benz**

**-amide (4e).** The reaction of phenyl(pyrrolidin-1-yl)methanethione (**1a**) (0.2 mmol, 38.3 mg), 3-(4-nitrophenyl)-1,4,2-dioxazol-5-one (**2f**) (0.24 mmol, 49.9 mg), Cp\*Co(CO)I<sub>2</sub>

(4.8 mg, 0.01 mmol), AgSbF<sub>6</sub> (13.8 mg, 0.04 mmol), PhCO<sub>2</sub>Na (7.2 mg, 0.04 mmol), and DCE (2 mL) were stirred at 40 °C for 12 h in Ar as monitored by TLC. The resulting mixture was concentrated and purified by flash chromatography on silica gel to **4e**; Yellow oil, 62.5 mg, yield: 88%. <sup>1</sup>H NMR (400 MHz, CDCl<sub>3</sub>) δ 10.2 (s, 1H), 8.34 (dd, *J* = 8.8, 2.0 Hz, 3H), 8.10 (t, *J* = 7.2 Hz, 2H), 7.45-7.40 (m, 1H), 7.21-7.15 (m, 2H), 3.98 (d, *J* = 6.0 Hz, 2H), 3.36 (s, 1H), 3.34 (m, 1H), 2.07-1.89 (m, 4H) ppm. <sup>13</sup>C NMR (100 MHz, CDCl<sub>3</sub>) δ 192.8, 163.0, 149.8, 139.9, 133.2, 133.0,



129.9, 128.5, 125.2, 124.6, 123.9, 123.3, 54.4, 53.3, 26.2, 24.4 ppm. **HRMS m/z (ESI)**: calcd. for C<sub>18</sub>H<sub>18</sub>N<sub>3</sub>O<sub>3</sub>S [M+H]<sup>+</sup> 356.1063, found: 356.1052.

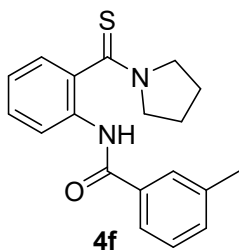

**22) 3-Methyl-N-(2-(pyrrolidine-1-carbonothioyl)phenyl)benz**

**-amide (4f)**. The reaction of phenyl(pyrrolidin-1-yl)methanethione (**1a**) (0.2 mmol, 38.3 mg), 3-(4-nitrophenyl)-1,4,2-dioxazol-5-one (**2g**) (0.24 mmol, 42.5 mg), Cp\*Co(CO)I<sub>2</sub> (4.8 mg, 0.01 mmol),

AgSbF<sub>6</sub> (13.8 mg, 0.04 mmol), PhCO<sub>2</sub>Na (7.2 mg, 0.04 mmol), and DCE (2 mL) were stirred at 40 °C for 12 h in Ar as monitored by TLC. The resulting mixture was concentrated and purified by flash chromatography on silica gel to **4f**; Yellow oil, 42.9 mg, yield: 66%. **<sup>1</sup>H NMR (400 MHz, CDCl<sub>3</sub>)** δ 8.91 (s, 1H), 8.26 (d, *J* = 4.4 Hz, 1H), 7.53 (d, *J* = 7.6 Hz, 1H), 7.45-7.40 (m, 1H), 7.21-7.34 (m, 2H), 7.26 (t, *J* = 6.0 Hz, 2H), 7.19-7.11 (m, 2H), 3.94 (t, *J* = 4.8 Hz, 2H), 3.50 (s, 1H), 3.41 (d, *J* = 4.0 Hz, 1H), 2.53 (s, 3H), 2.09-1.91 (m, 4H) ppm. **<sup>13</sup>C NMR (100 MHz, CDCl<sub>3</sub>)** δ 193.2, 167.9, 136.7, 135.7, 134.5, 132.9, 131.4, 130.5, 129.4, 127.1, 126.1, 124.9, 124.6, 123.7, 53.8, 52.9, 26.3, 24.5, 20.2 ppm. **HRMS m/z (ESI)**: calcd. for C<sub>19</sub>H<sub>20</sub>N<sub>2</sub>OSNa [M+Na]<sup>+</sup> 347.1189, found: 347.1178.

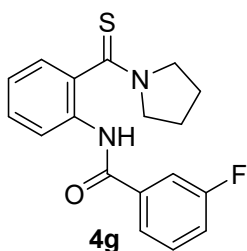

**23) 3-Fluoro-N-(2-(pyrrolidine-1-carbonothioyl)phenyl)benz**

**-amide(4g)**. The reaction of phenyl(pyrrolidin-1-yl)methanethione (**1a**) (0.2 mmol, 38.3 mg), 3-(3-fluorophenyl)-1,4,2-dioxazol-5-one (**2h**) (0.24 mmol, 43.5 mg), Cp\*Co(CO)I<sub>2</sub> (4.8 mg, 0.01 mmol),

AgSbF<sub>6</sub> (13.8 mg, 0.04 mmol), PhCO<sub>2</sub>Na (7.2 mg, 0.04 mmol), and DCE (2 mL) were stirred at 40 °C for 12 h in Ar as monitored by TLC. The resulting mixture was concentrated and purified by flash chromatography on silica gel to **4g**; Yellow oil,

46.6 mg, yield: 71%.  $^1\text{H NMR}$  (400 MHz,  $\text{CDCl}_3$ )  $\delta$  9.92 (s, 1H), 8.33 (d,  $J = 8.0$  Hz, 1H), 7.69 (d,  $J = 5.2$  Hz, 2H), 7.49-7.38 (m, 2H), 7.23 (d,  $J = 7.2$  Hz, 1H), 7.15 (d,  $J = 6.0$  Hz, 2H), 3.97 (s, 2H), 3.56 (s, 1H), 3.37 (s, 1H), 2.08-1.89 (m, 4H) ppm.  $^{13}\text{C NMR}$  (100 MHz,  $\text{CDCl}_3$ )  $\delta$  193.0, 164.1, 163.8 (d,  $^4J_{\text{C-F}} = 2.4$  Hz), 161.6, 136.7, 136.6, 133.3, 130.5, 129.7, 125.0, 124.3, 123.4, 122.5 (d,  $^4J_{\text{C-F}} = 3.1$  Hz), 119.0 (d,  $^2J_{\text{C-F}} = 21.0$  Hz), 114.9 (d,  $^2J_{\text{C-F}} = 22.4$  Hz), 54.2, 53.1, 26.2, 24.4;  $^{19}\text{F NMR}$  (377 MHz,  $\text{CDCl}_3$ )  $\delta$  -111.9 ppm (reference:  $\text{PhCF}_3$ ). **HRMS m/z (ESI):** calcd. for  $\text{C}_{18}\text{H}_{18}\text{FN}_2\text{OS}$   $[\text{M}+\text{H}]^+$  339.1118, found: 339.1113.

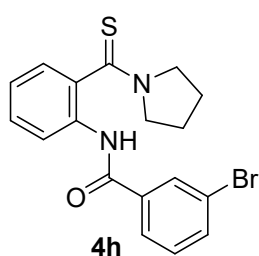

**24) 3-Chloro-N-(2-(pyrrolidine-1-carbonothioyl)phenyl)benzamide (4h).**

The reaction of phenyl(pyrrolidin-1-yl)methanethione (**1a**) (0.2 mmol, 38.3 mg), 3-(3-bromophenyl)-1,4,2-dioxazol-5-one (**2i**) (0.24 mmol, 47.4 mg),  $\text{Cp}^*\text{Co}(\text{CO})\text{I}_2$  (4.8 mg, 0.01 mmol),  $\text{AgSbF}_6$  (13.8 mg, 0.04 mmol),  $\text{PhCO}_2\text{Na}$  (7.2 mg, 0.04 mmol), and DCE (2 mL) were stirred at 40 °C for 12 h in Ar as monitored by TLC. The resulting mixture was concentrated and purified by flash chromatography on silica gel to **4h**; Yellow oil, 57.6 mg, yield: 74%.  $^1\text{H NMR}$  (400 MHz,  $\text{CDCl}_3$ )  $\delta$  9.92 (s, 1H), 8.31 (d,  $J = 8.4$  Hz, 1H), 7.81 (d,  $J = 8.0$  Hz, 2H), 7.62 (d,  $J = 8.0$  Hz, 2H), 7.39 (t,  $J = 6.8$  Hz, 1H), 7.15 (d,  $J = 6.4$  Hz, 2H), 3.97 (d,  $J = 6.0$  Hz, 2H), 3.55 (s, 1H), 3.36 (s, 1H), 2.07-1.89 (m, 4H) ppm.  $^{13}\text{C NMR}$  (100 MHz,  $\text{CDCl}_3$ )  $\delta$  193.0, 164.1, 133.3, 133.2, 133.1, 132.0, 129.7, 128.9, 126.7, 125.0, 124.2, 123.3, 54.2, 53.1, 26.2, 24.4 ppm. **HRMS m/z (ESI):** calcd. for  $\text{C}_{18}\text{H}_{17}\text{N}_2\text{BrOSNa}$   $[\text{M}+\text{Na}]^+$  389.0318, found: 389.0313.

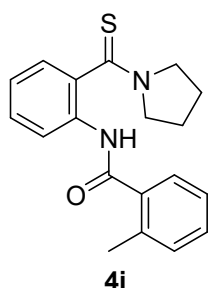

**25) 2-Methyl-N-(2-(pyrrolidine-1-carbonothioyl)phenyl)benzamide (4i).**

**-amide (4i).** The reaction of phenyl(pyrrolidin-1-yl)methanethione (**1a**) (0.2 mmol, 38.3 mg), 3-(*o*-tolyl)-1,4,2-dioxazol-5-one (**2j**) (0.24 mmol, 42.5 mg), Cp\*Co(CO)I<sub>2</sub> (4.8 mg, 0.01 mmol), AgSbF<sub>6</sub> (13.8 mg, 0.04 mmol), PhCO<sub>2</sub>Na (7.2 mg, 0.04 mmol), and DCE (2 mL) were stirred at 40 °C for 12 h in Ar as monitored by TLC. The resulting mixture was concentrated and purified by flash chromatography on silica gel to **4i**; Yellow oil, 48.8 mg, yield: 75%. <sup>1</sup>H NMR (400 MHz, CDCl<sub>3</sub>) δ 9.71 (s, 1H), 8.32 (d, *J* = 8.4 Hz, 1H), 7.77 (s, 1H), 7.71 (dd, *J* = 6.4, 2.0 Hz, 1H), 7.42-7.35 (m, 3H), 7.15-7.12 (m, 2H), 3.97 (dd, *J* = 4.8, 2.0 Hz, 1H), 3.53 (s, 1H), 3.36 (d, *J* = 4.8 Hz, 1H), 2.43 (s, 3H), 2.09-1.89 (s, 4H) ppm. <sup>13</sup>C NMR (100 MHz, CDCl<sub>3</sub>) δ 193.3, 165.3, 138.7, 134.3, 133.7, 133.4, 132.7, 129.6, 128.7, 128.2, 124.9, 124.2, 124.1, 123.5, 54.0, 53.0, 26.2, 24.4, 21.4 ppm. HRMS *m/z* (ESI): calcd. for C<sub>19</sub>H<sub>20</sub>N<sub>2</sub>OSNa [M+Na]<sup>+</sup> 347.1189, found: 347.1168.

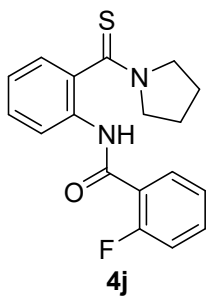

**26) 2-Fluoro-*N*-(2-(pyrrolidine-1-carbonothioyl)phenyl)**

**-benzamide(4j).** The reaction of phenyl(pyrrolidin-1-yl)methanethione (**1a**) (0.2 mmol, 38.3 mg), 3-(2-fluorophenyl)-1,4,2-dioxazol-5-one (**2k**) (0.24 mmol, 43.5 mg), Cp\*Co(CO)I<sub>2</sub> (4.8 mg,

0.01 mmol), AgSbF<sub>6</sub> (13.8 mg, 0.04 mmol), PhCO<sub>2</sub>Na (7.2 mg, 0.04 mmol), and DCE (2 mL) were stirred at 40 °C for 12 h in Ar as monitored by TLC. The resulting mixture was concentrated and purified by flash chromatography on silica gel to **4j**; Yellow oil, 21.7 mg, yield: 33%. <sup>1</sup>H NMR (400 MHz, CDCl<sub>3</sub>) δ 9.09 (d, *J* = 11.2 Hz, 1H), 8.30 (d, *J* = 8.4 Hz, 1H), 8.10 (t, *J* = 2.8 Hz, 1H), 7.50 (dd, *J* = 12.8, 6.8 Hz, 1H), 7.28 (dd, *J* = 8.0, 1.2 Hz, 1H), 7.30 (t, *J* = 7.6 Hz, 1H), 7.21-7.14 (m, 3H), 4.00 (t, *J* = 2.8 Hz, 2H), 3.44 (t, *J* = 4.8 Hz, 1H), 3.35 (t, *J* = 5.6 Hz, 1H), 2.10-1.91 (m, 4H) ppm.

$^{13}\text{C}$  NMR (100 MHz,  $\text{CDCl}_3$ )  $\delta$  193.2, 161.6, 161.5, 159.0, 135.3, 133.7, 133.6, 132.1, 132.0, 130.1, 129.1, 128.4, 125.0, 123.6, 121.7, 121.6, 116.4, 116.2, 53.3, 52.8, 26.2, 24.5 ppm.  $^{19}\text{F}$  NMR (377 MHz,  $\text{CDCl}_3$ )  $\delta$  -113.6 ppm (reference:  $\text{PhCF}_3$ ).  
**HRMS m/z (ESI):** calcd. for  $\text{C}_{18}\text{H}_{18}\text{FN}_2\text{OS}$   $[\text{M}+\text{H}]^+$  339.1118, found: 339.1110.

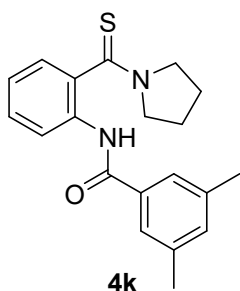

**27) 3,5-Dimethyl-N-(2-(pyrrolidine-1-carbonothioyl)phenyl)**

**-benzamide (4k).** The reaction of phenyl(pyrrolidin-1-yl)methanethione (**1a**) (0.2 mmol, 38.3 mg), 3-(3,5-dimethylphenyl)-1,4,2-dioxazol-5-one (**2l**) (0.24 mmol, 45.9 mg),

$\text{Cp}^*\text{Co}(\text{CO})\text{I}_2$  (4.8 mg, 0.01 mmol),  $\text{AgSbF}_6$  (13.8 mg, 0.04 mmol),  $\text{PhCO}_2\text{Na}$  (7.2 mg, 0.04 mmol), and DCE (2 mL) were stirred at 40 °C for 12 h in Ar as monitored by TLC. The resulting mixture was concentrated and purified by flash chromatography on silica gel to **4k**; Yellow oil, 50.9 mg, yield: 75%.  $^1\text{H}$  NMR (400 MHz,  $\text{CDCl}_3$ )  $\delta$  9.62 (s, 1H), 8.30 (d,  $J = 8.0$  Hz, 1H), 7.53 (s, 2H), 7.41-7.37 (m, 1H), 7.18 (s, 1H), 7.15-7.12 (m, 3H), 3.97 (dd,  $J = 12.4, 5.2$  Hz, 2H), 3.53 (d,  $J = 7.6$  Hz, 1H), 3.35 (s, 1H), 2.39 (s, 6H), 2.01-1.87 (m, 4H) ppm.  $^{13}\text{C}$  NMR (100MHz,  $\text{CDCl}_3$ )  $\delta$  193.3, 165.5, 138.4, 134.3, 133.7, 133.5, 133.3, 129.5, 125.0, 124.9, 124.0, 123.4, 53.9, 53.0, 26.2, 24.4, 21.2 ppm. **HRMS m/z (ESI):** calcd. for  $\text{C}_{20}\text{H}_{23}\text{N}_2\text{OS}$   $[\text{M}+\text{H}]^+$  339.1526, found: 339.1511.

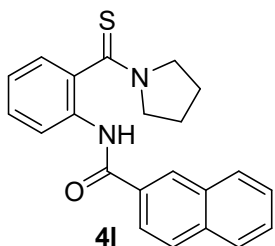

**28) N-(2-(pyrrolidine-1-carbonothioyl)phenyl)-2-naphth**

**-amide (4l).** The reaction of Phenyl(pyrrolidin-1-yl)methanethione (**1a**) (0.2 mmol, 38.3 mg), 3-(naphthalen-2-yl)-1,4,2-dioxazol-5-one (**2m**) (0.24 mmol, 51.2 mg),  $\text{Cp}^*\text{Co}(\text{CO})\text{I}_2$

(4.8 mg, 0.01 mmol), AgSbF<sub>6</sub> (13.8 mg, 0.04 mmol), PhCO<sub>2</sub>Na (7.2 mg, 0.04 mmol), and DCE (2 mL) were stirred at 40 °C for 12 h in Ar as monitored by TLC. The resulting mixture was concentrated and purified by flash chromatography on silica gel to **4l**; Yellow oil, 67.0 mg, yield: 93%. <sup>1</sup>H NMR (400 MHz, CDCl<sub>3</sub>) δ 9.96 (s, 1H), 8.48 (s, 1H), 8.38 (d, *J* = 8.0 Hz, 1H), 8.01-7.88 (m, 4H), 7.61-7.54 (m, 2H), 7.44-7.40 (m, 1H), 7.16 (dd, *J* = 5.6, 3.2 Hz, 3.98 (t, *J* = 5.6 Hz, 2H), 3.56 (d, *J* = 6.8 Hz, 1H), 3.39 (s, 1H), 2.06-1.86 (m, 4H); <sup>13</sup>C NMR (100 MHz, CDCl<sub>3</sub>) δ 193.3, 165.2, 135.0, 133.6, 133.5, 132.6, 131.5, 129.7, 129.3, 128.7, 128.2, 127.9, 127.7, 126.78, 125.0, 124.2, 123.6, 123.5, 54.1, 53.1, 24.2, 24.4 ppm. HRMS *m/z* (ESI): calcd. for C<sub>22</sub>H<sub>20</sub>N<sub>2</sub>OSNa [M+Na]<sup>+</sup> 383.1189, found: 383.1170.

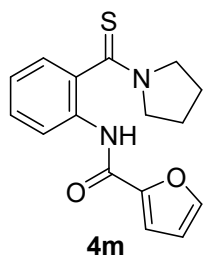

**29) N-(2-(pyrrolidine-1-carbonothioyl)phenyl)furan-2-car**

**-boxamide (4m).** The reaction of phenyl(pyrrolidin-1-yl)methanethione (**1a**) (0.2 mmol, 38.3 mg), 3-(furan-2-yl)-1,4,2-dioxazol-5-one (**2n**) (0.24 mmol, 36.7 mg), Cp\*Co(CO)I<sub>2</sub> (4.8 mg,

0.01 mmol), AgSbF<sub>6</sub> (13.8 mg, 0.04 mmol), PhCO<sub>2</sub>Na (7.2 mg, 0.04 mmol), and DCE (2 mL) were stirred at 40 °C for 12 h in Ar as monitored by TLC. The resulting mixture was concentrated and purified by flash chromatography on silica gel to **4m**; Yellow oil, 24.6 mg, yield: 41%. <sup>1</sup>H NMR (400 MHz, CDCl<sub>3</sub>) δ 9.93 (s, 1H), 8.26 (d, *J* = 8.4 Hz, 1H), 7.53 (s, 1H), 7.39-7.35 (m, 1H), 7.20 (d, *J* = 3.2 Hz, 1H), 7.14 (d, *J* = 4.0 Hz, 2H), 3.99 (t, *J* = 7.2 Hz, 2H), 3.50 (t, *J* = 7.2 Hz, 1H), 3.33 (d, *J* = 4.4 Hz, 1H), 2.10-1.89 (m, 4H) ppm. <sup>13</sup>C NMR (100 MHz, CDCl<sub>3</sub>) δ 168.9, 165.1, 137.7, 134.5, 131.8, 128.7, 127.8, 127.2, 124.0, 122.6, 122.0, 50.4, 46.5, 26.4, 24.2 ppm. HRMS *m/z* (ESI): calcd. for C<sub>12</sub>H<sub>17</sub>N<sub>2</sub>O<sub>2</sub>S [M+H]<sup>+</sup> 301.1005, found: 301.0999.



#### 4. Structural modification of Adapalene

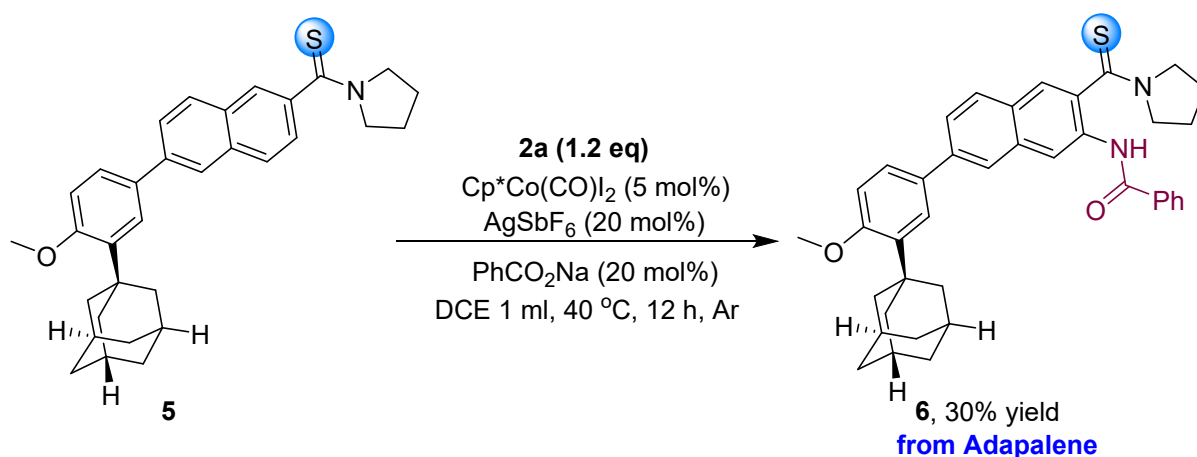

The reaction of (6-(3-((3*R*,5*R*,7*R*)-adamantan-1-yl)-4-methoxyphenyl) naphthalen-2-yl) (pyrrolidin-1-yl)methanethione (**5**) (0.1 mmol, 41.2 mg), 1,4,2-dioxazol-5-one (**2b**) (0.12 mmol, 19.5 mg), Cp\*Co(CO)I<sub>2</sub> (2.4 mg, 0.005 mmol), AgSbF<sub>6</sub> (6.9 mg, 0.02 mmol), PhCO<sub>2</sub>Na (3.6 mg, 0.04 mmol), in 2 mL DCE at 40 °C under Ar for 12 h as monitored by TLC. The resulting mixture was concentrated and purified by flash chromatography on silica gel to afford 17.8 mg (30%) of **6** as solid. **<sup>1</sup>H NMR (400 MHz, CDCl<sub>3</sub>)** δ 9.94 (s, 1H), 8.94 (s, 1H), 8.06-8.00 (dd, *J* = 17.2, *J* = 7.2 Hz, 3H), 7.79 (d, *J* = 8.8 Hz, 1H), 7.71 (d, *J* = 8.0 Hz, 1H), 7.62 (d, *J* = 2.0 Hz, 2H), 7.57-7.50 (m, 4H), 7.00 (d, *J* = 8.4 Hz, 1H), 4.08-4.12 (dd, *J* = 18.8 Hz, *J* = 11.2, 2H), 3.91 (d, *J* = 6.8 Hz, 3H), 3.65 (d, *J* = 4.0 Hz, 1H), 3.40 (s, 1H), 2.22 (t, *J* = 8.0 Hz, 6H), 2.11 (s, 4H), 2.01 (d, *J* = 4.8 Hz, 2H), 1.84 (s, 6H) ppm. **<sup>13</sup>C NMR (100 MHz, CDCl<sub>3</sub>)** δ 193.2, 165.2, 158.8, 140.2, 138.9, 134.5, 134.1, 132.8, 132.5, 132.0, 130.8, 128.8, 128.4, 128.0, 127.3, 125.9, 125.6, 125.5, 124.9, 124.0, 120.6, 112.1, 55.1, 54.4, 53.3, 40.6, 37.2, 37.1, 29.7, 29.3, 29.1, 26.2, 24.5 ppm. **HRMS m/z (ESI):** calcd. for C<sub>39</sub>H<sub>40</sub>N<sub>2</sub>O<sub>2</sub>SNa [M+H]<sup>+</sup> 623.2703, found: 623.2720.

#### 5. Gram-scale reaction

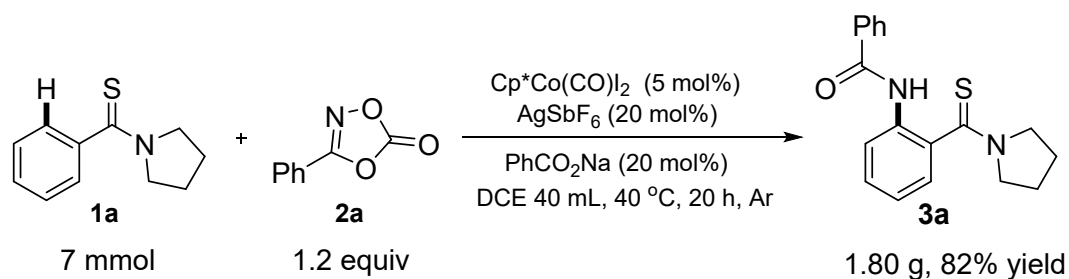

The reaction of phenyl(pyrrolidin-1-yl)methanethione (**1a**) (7 mmol, 1.34 g), 3-phenyl-1,4,2-dioxazol-5-one (**2a**) (8.4 mmol, 1.37 g), Cp\*Co(CO)I<sub>2</sub> (168 mg, 0.35 mmol), AgSbF<sub>6</sub> (483 mg, 1.4 mmol), PhCO<sub>2</sub>Na (252 mg, 1.4 mmol), and DCE (40 mL) were stirred at 40 °C for 20 h in Ar as monitored by TLC. The resulting mixture was concentrated and purified by flash chromatography on silica gel to **3a**; Yellow solid, 1.80 g, yield: 82%.

## 6. Transformation of amidated product

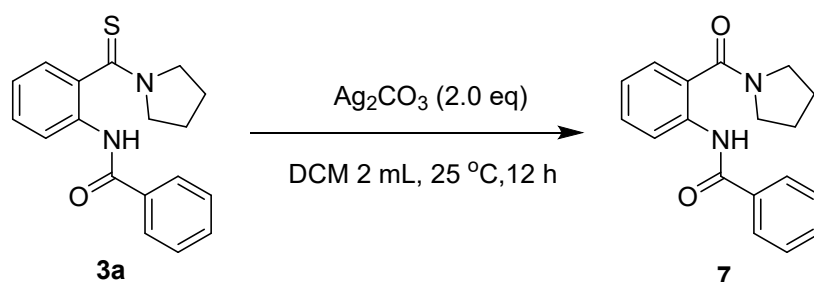

**Synthesis of 7:** **3a** (0.1 mmol), Ag<sub>2</sub>CO<sub>3</sub> (0.2 mmol) and DCM (2 mL) was added to a 50 mL Schlenk flask, the mixture was stirred at 25 °C for 12 h. Monitored by TLC until the reaction was complete. The product was purified by flash chromatography (petroleum ether /ethyl acetate =10:1) affording **7**, 58.8 mg, 90% yield. <sup>1</sup>H NMR (400 MHz, CDCl<sub>3</sub>) δ 10.82 (s, 1H), 8.56 (d, *J* = 8.2 Hz, 1H), 7.99 (d, *J* = 6.8 Hz, 2H), 7.54-7.43 (m, 5H), 7.11 (t, *J* = 7.6 Hz, 1H), 3.67 (t, *J* = 6.0 Hz, 2H), 3.54 (t, *J* = 5.6 Hz, 2H), 1.98 (t, *J* = 6.0 Hz, 2H), 1.87 (d, *J* = 5.6 Hz, 2H) ppm. <sup>13</sup>C NMR (100 MHz, CDCl<sub>3</sub>) □ 168.9, 165.1, 137.7, 134.5, 131.8, 128.7, 127.8, 127.2, 124.0, 122.6, 122.0,



50.4, 46.5, 26.4, 24.2 ppm.

## 7. Mechanistic studies

### H/D exchange experiments

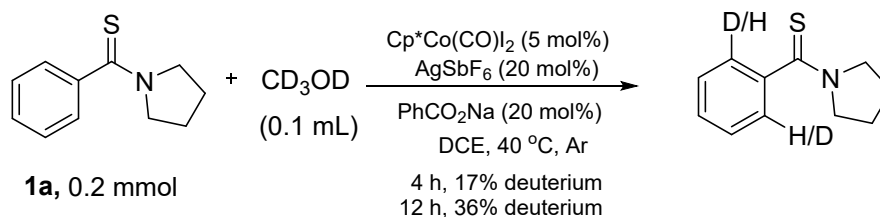

Scheme S1 H/D exchange experiment

To a 25 mL Schlenk tube was added **1a** (0.2 mmol),  $\text{CD}_3\text{OD}$  (0.1 mL),  $\text{Cp}^*\text{Co}(\text{CO})\text{I}_2$  (5 mol%),  $\text{AgSbF}_6$  (20 mol%),  $\text{PhCO}_2\text{Na}$  (20 mol%) and DCE (2 mL), were stirred at 40 °C for 4 h or 12 h in Ar. After cooling to room temperature, the solvent was removed under vacuum. The residue was purified by flash chromatography silica gel. The deuterium incorporation was estimated to be 17% for 4 h and 36% for 12 h.

4h:

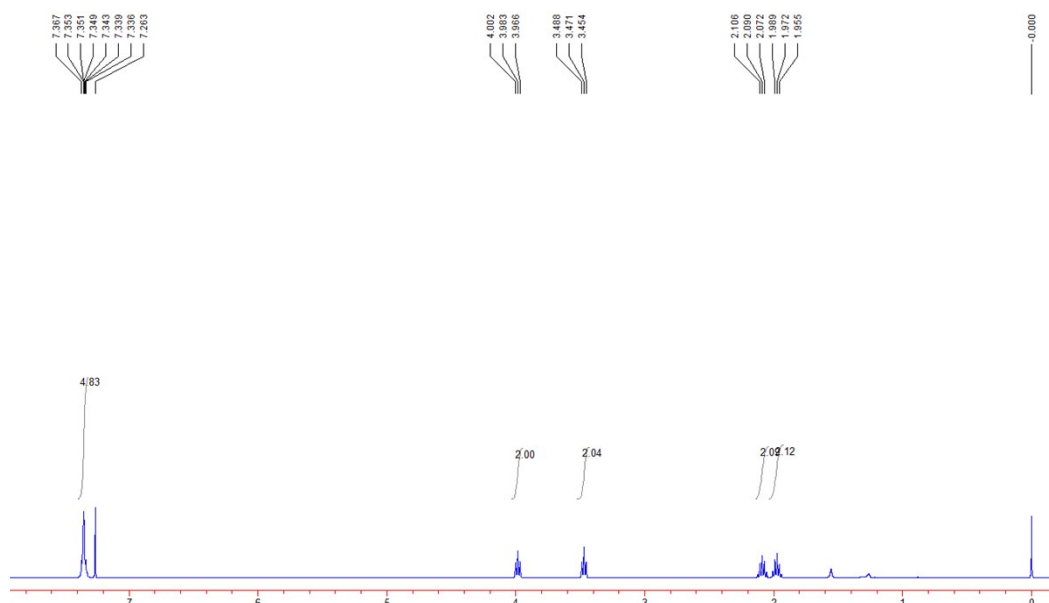

**12h:**

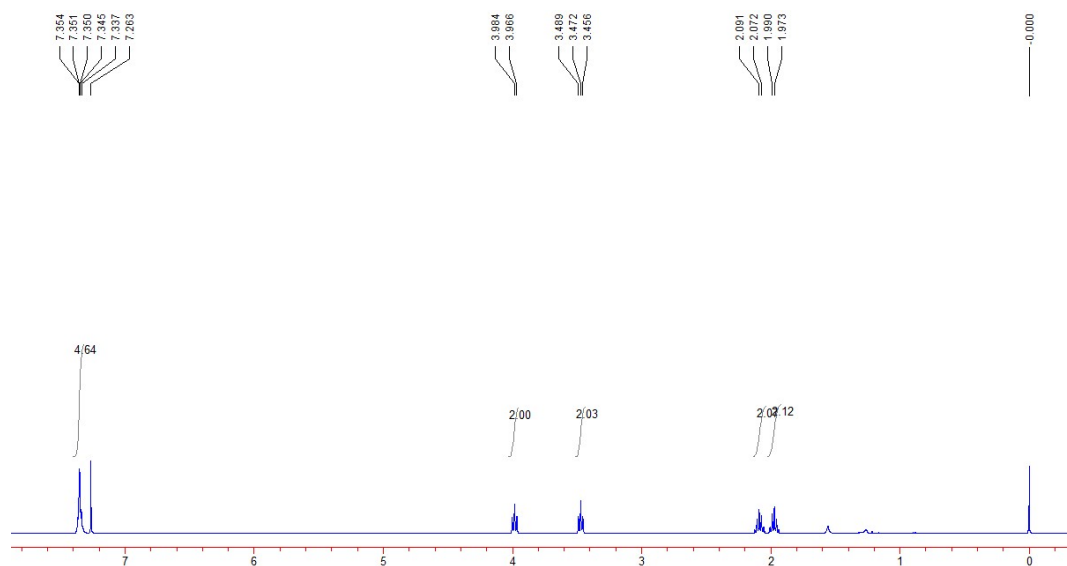

### KIE experiments

The reaction of **1a** (19.1 mg, 0.1 mmol) and **1a-d<sub>5</sub>** (19.6 mg, 0.1 mmol), Cp\*Co(CO)I<sub>2</sub> (5 mol%), AgSbF<sub>6</sub> (13.8 mg, 0.04 mmol), PhCO<sub>2</sub>Na (7.2 mg, 0.04 mmol), 3-phenyl-1,4,2-dioxazol-5-one (39.1 mg, 0.24 mmol) and DCE (2 mL) were stirred at 40 °C for 4 h in Ar. The volatiles were removed under reduced pressure. The residue was purified by silica gel column chromatography. *KIE* value ( $K_H/K_D = 2.6$ ) was determined on the basis of <sup>1</sup>H NMR analysis.

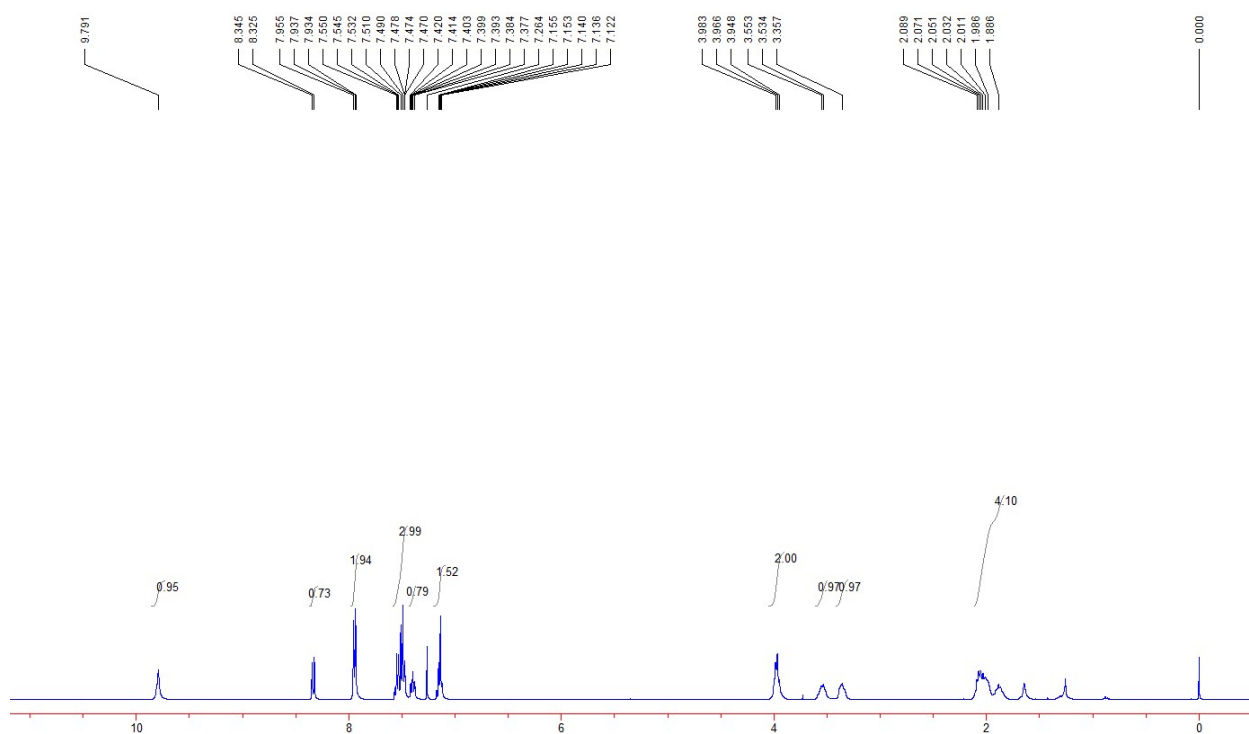

A mixture of phenyl(pyrrolidin-1-yl)methanethione (**1a**) (0.20 mmol) or deuterium-labeled compound [D1]-**1a** (0.20 mmol), 3-phenyl-1,4,2-dioxazol-5-one (**2a**) (0.24 mmol, 39.1 mg), Cp\*Co(CO)I<sub>2</sub> (5 mol%), AgSbF<sub>6</sub> (20 mol%), PhCO<sub>2</sub>Na (20 mol%) and DCE (2 mL) were added into a dry sealed tube. The reactions were stirred at 40 °C in parallel for 4 h. After cooling to room temperature, these two reactions were combined and the solvent was removed under vacuum. The residue was purified by flash chromatography silica gel. 41% starting material was recovered. *KIE* value ( $K_H/K_D = 1.9$ ) was determined on the basis of <sup>1</sup>H NMR analysis.

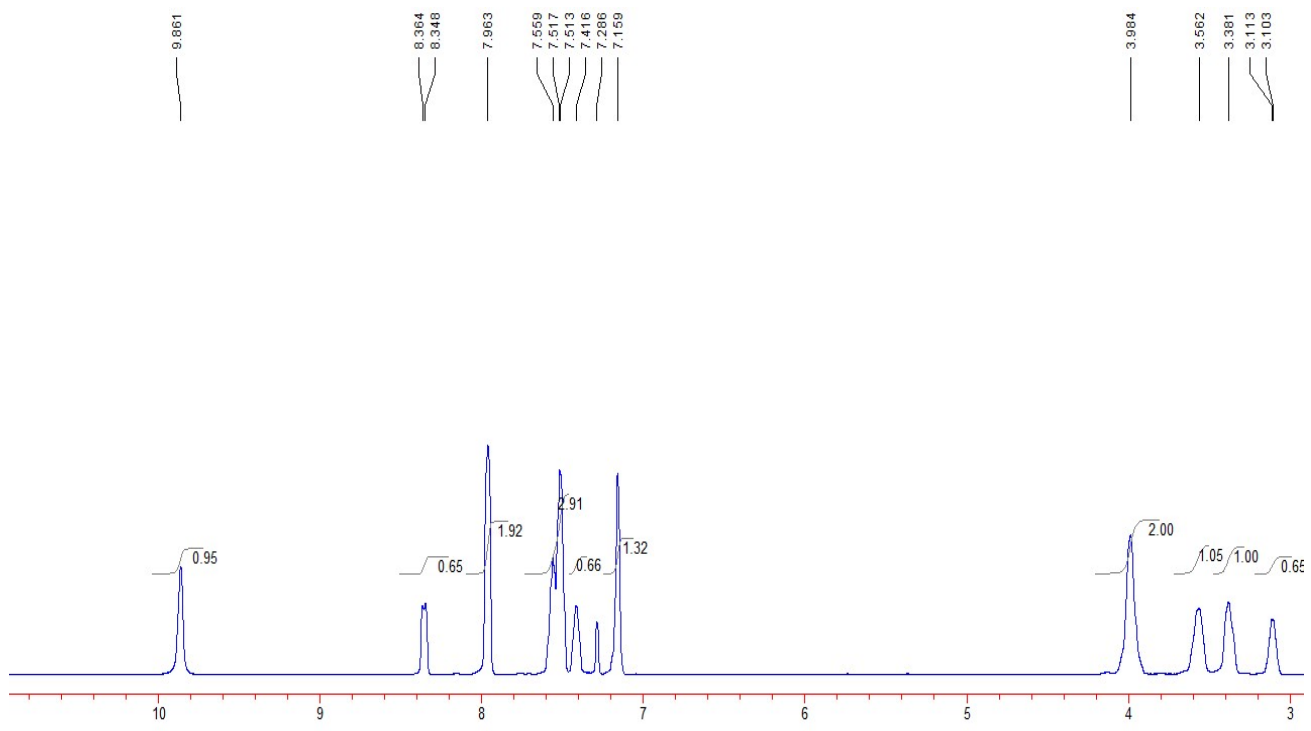

## 8. References

[1] L. Hie, N. F. Fine Nathel, T. K. Shah, E. L. Baker, X. Hong, Y.-F. Yang, P. Liu, K. N. Houk, N. K. Garg, *Nature*. **2015**, 524, 79-83.

[2] J. E. Spangler, Y. Kobayashi, P. Verma, D.-H. Wang, J.-Q. Yu, *J. Am. Chem. Soc.* **2015**, 137, 11876-11879.

## 9. $^1\text{H}$ NMR, $^{13}\text{C}$ NMR and $^{19}\text{F}$ NMR spectra for products

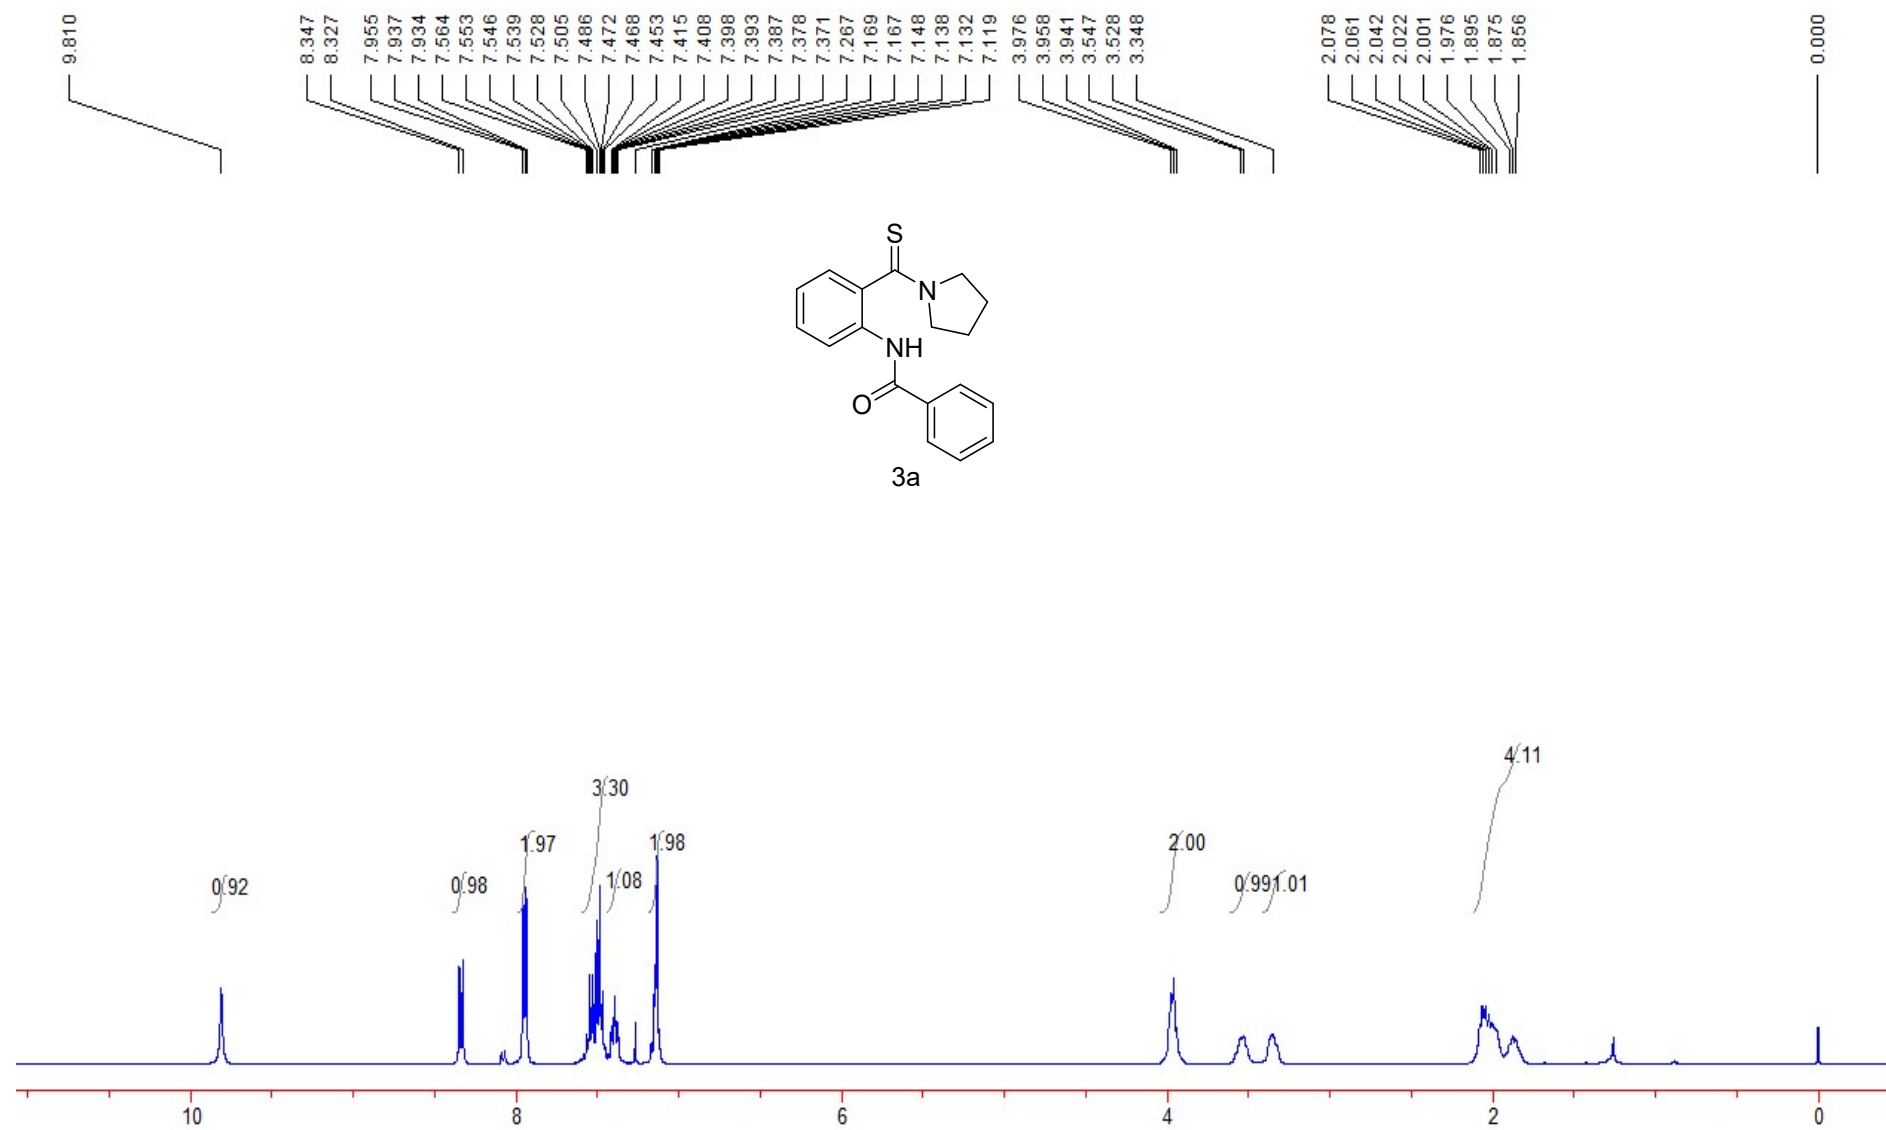

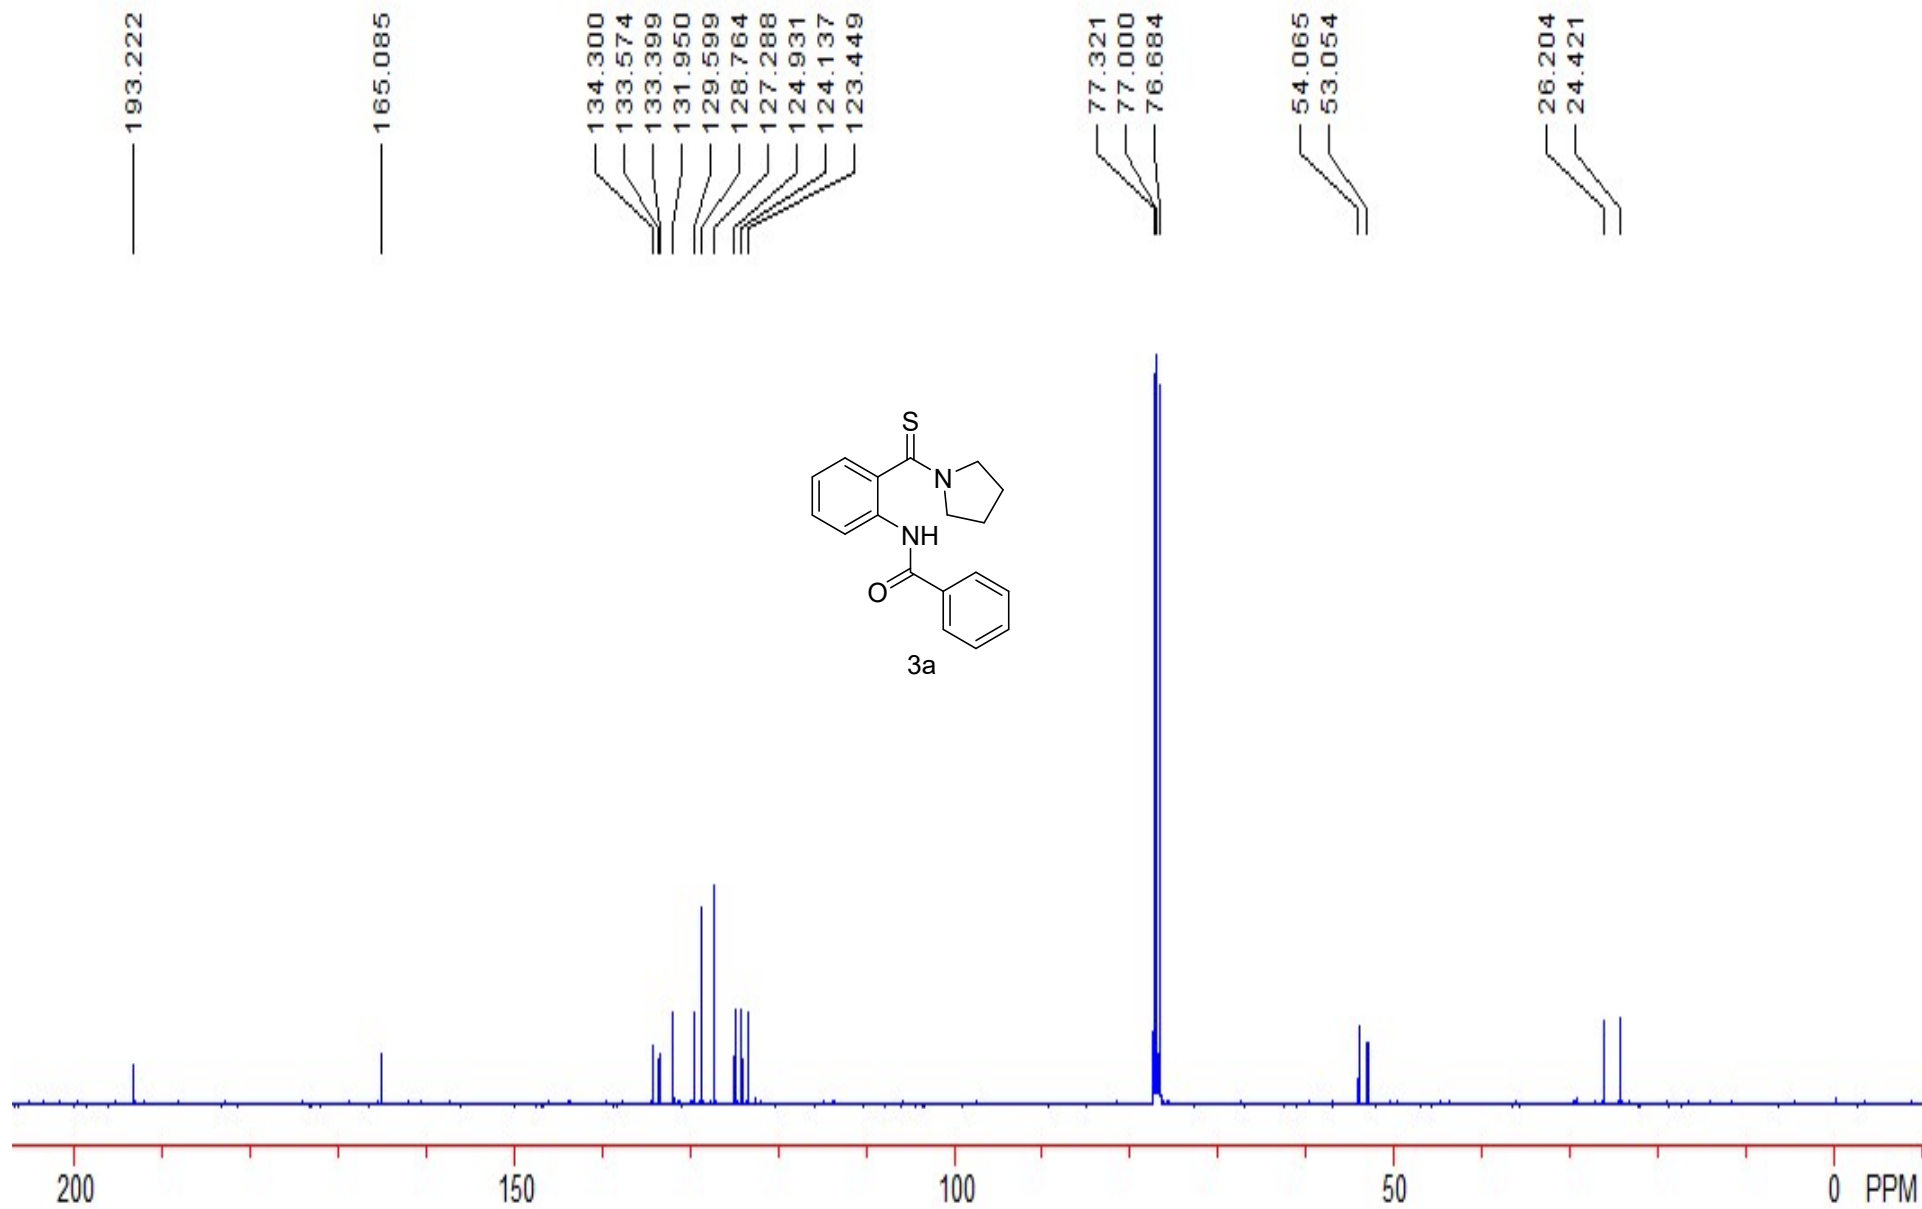



9.920

7.962  
8.185  
7.943  
7.559  
7.542  
7.525  
7.504  
7.485  
7.468  
7.265  
7.029  
7.010  
6.961  
6.942

3.958

3.550  
3.387

2.392  
2.060  
2.043  
2.020  
1.876

0.000

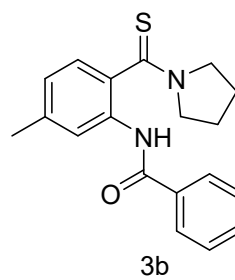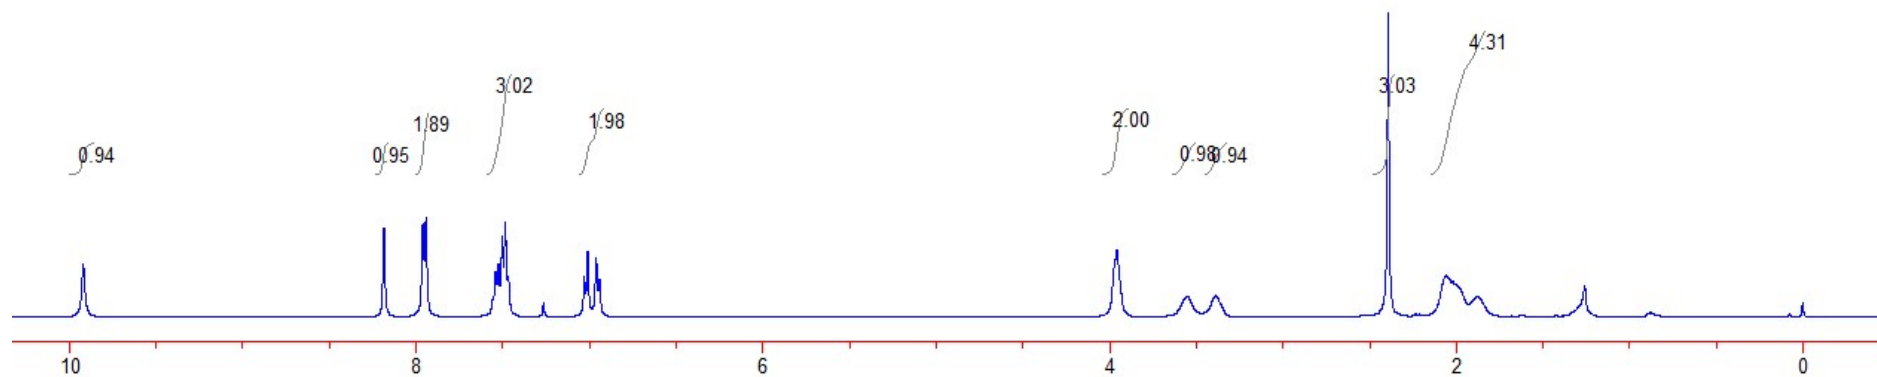

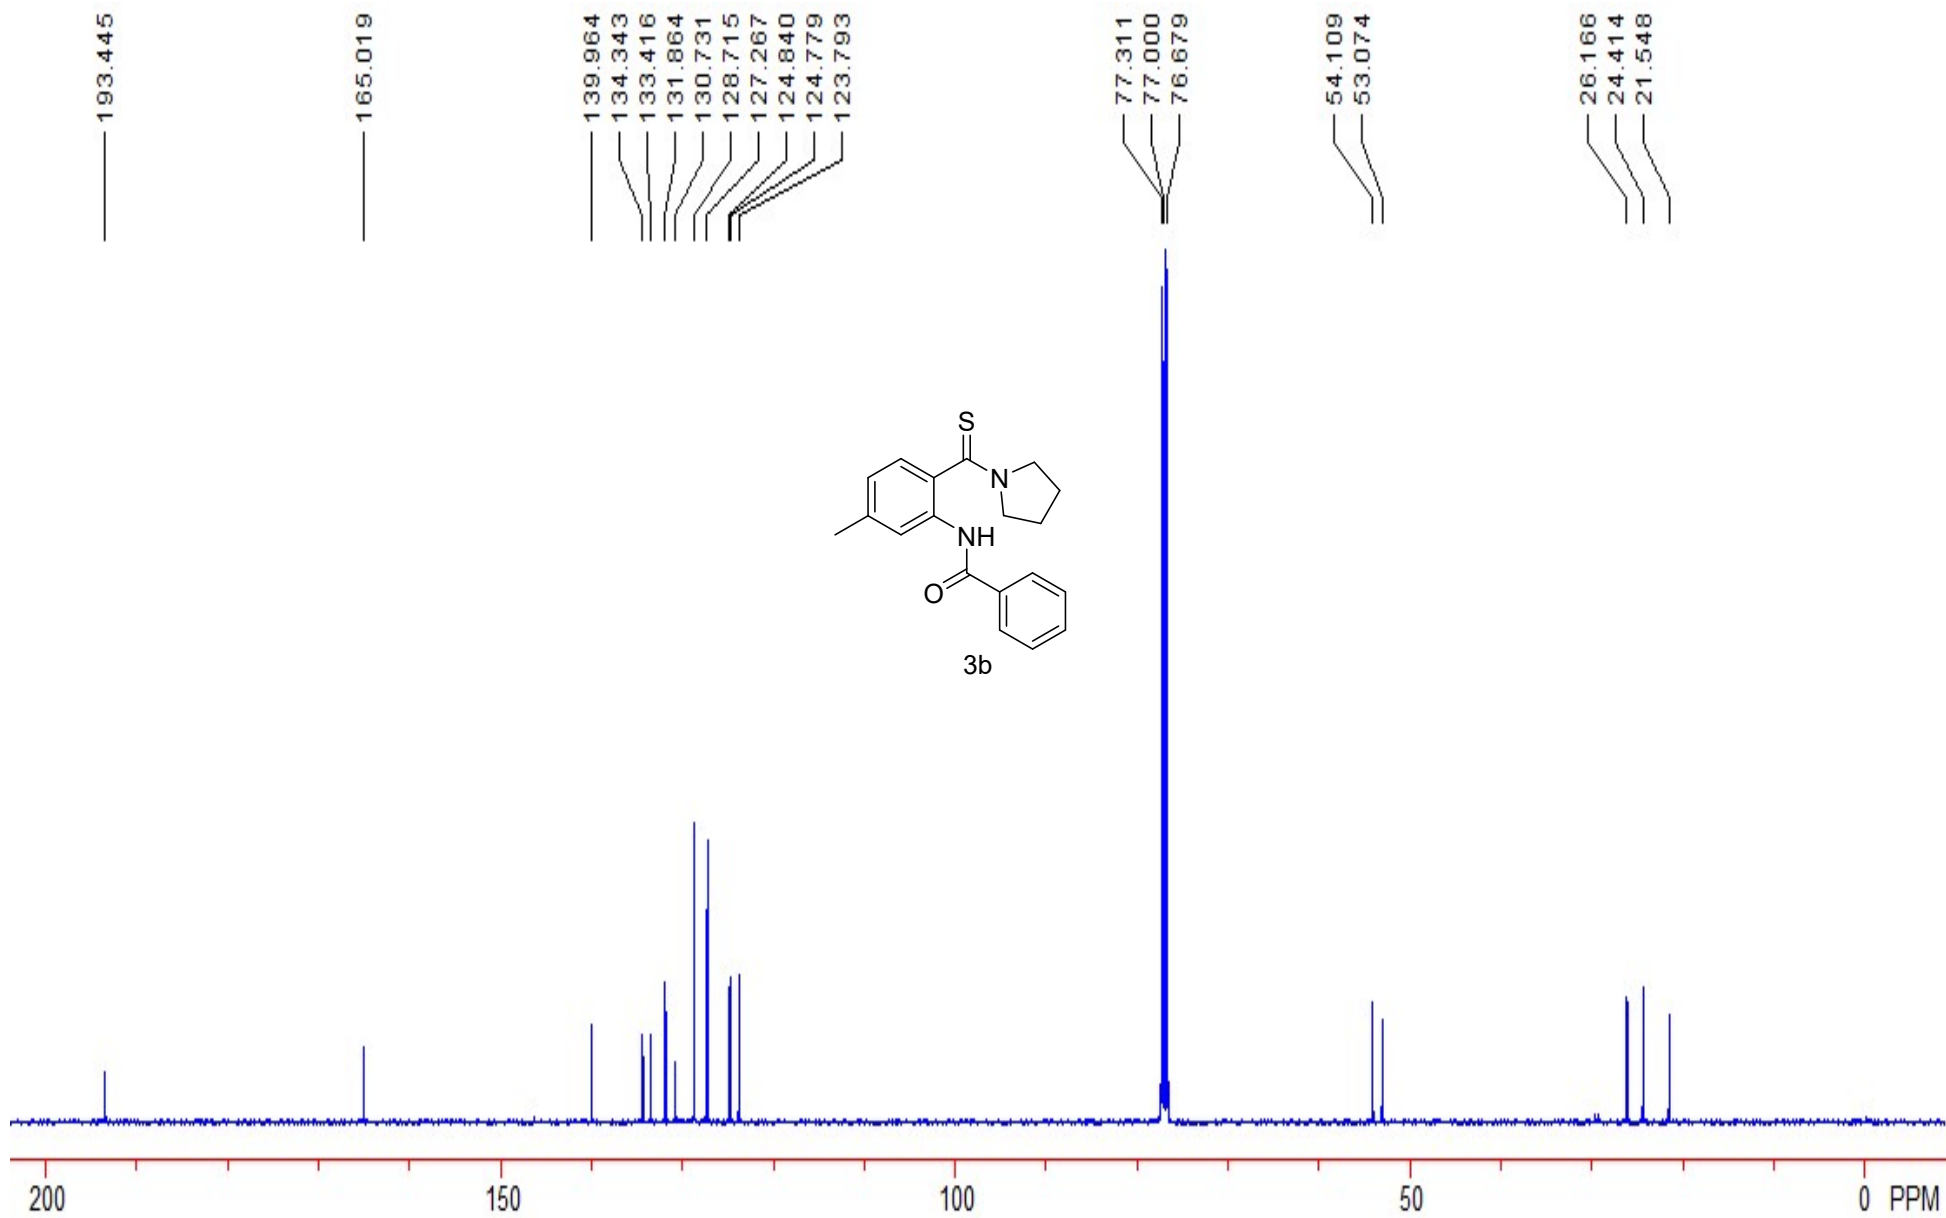

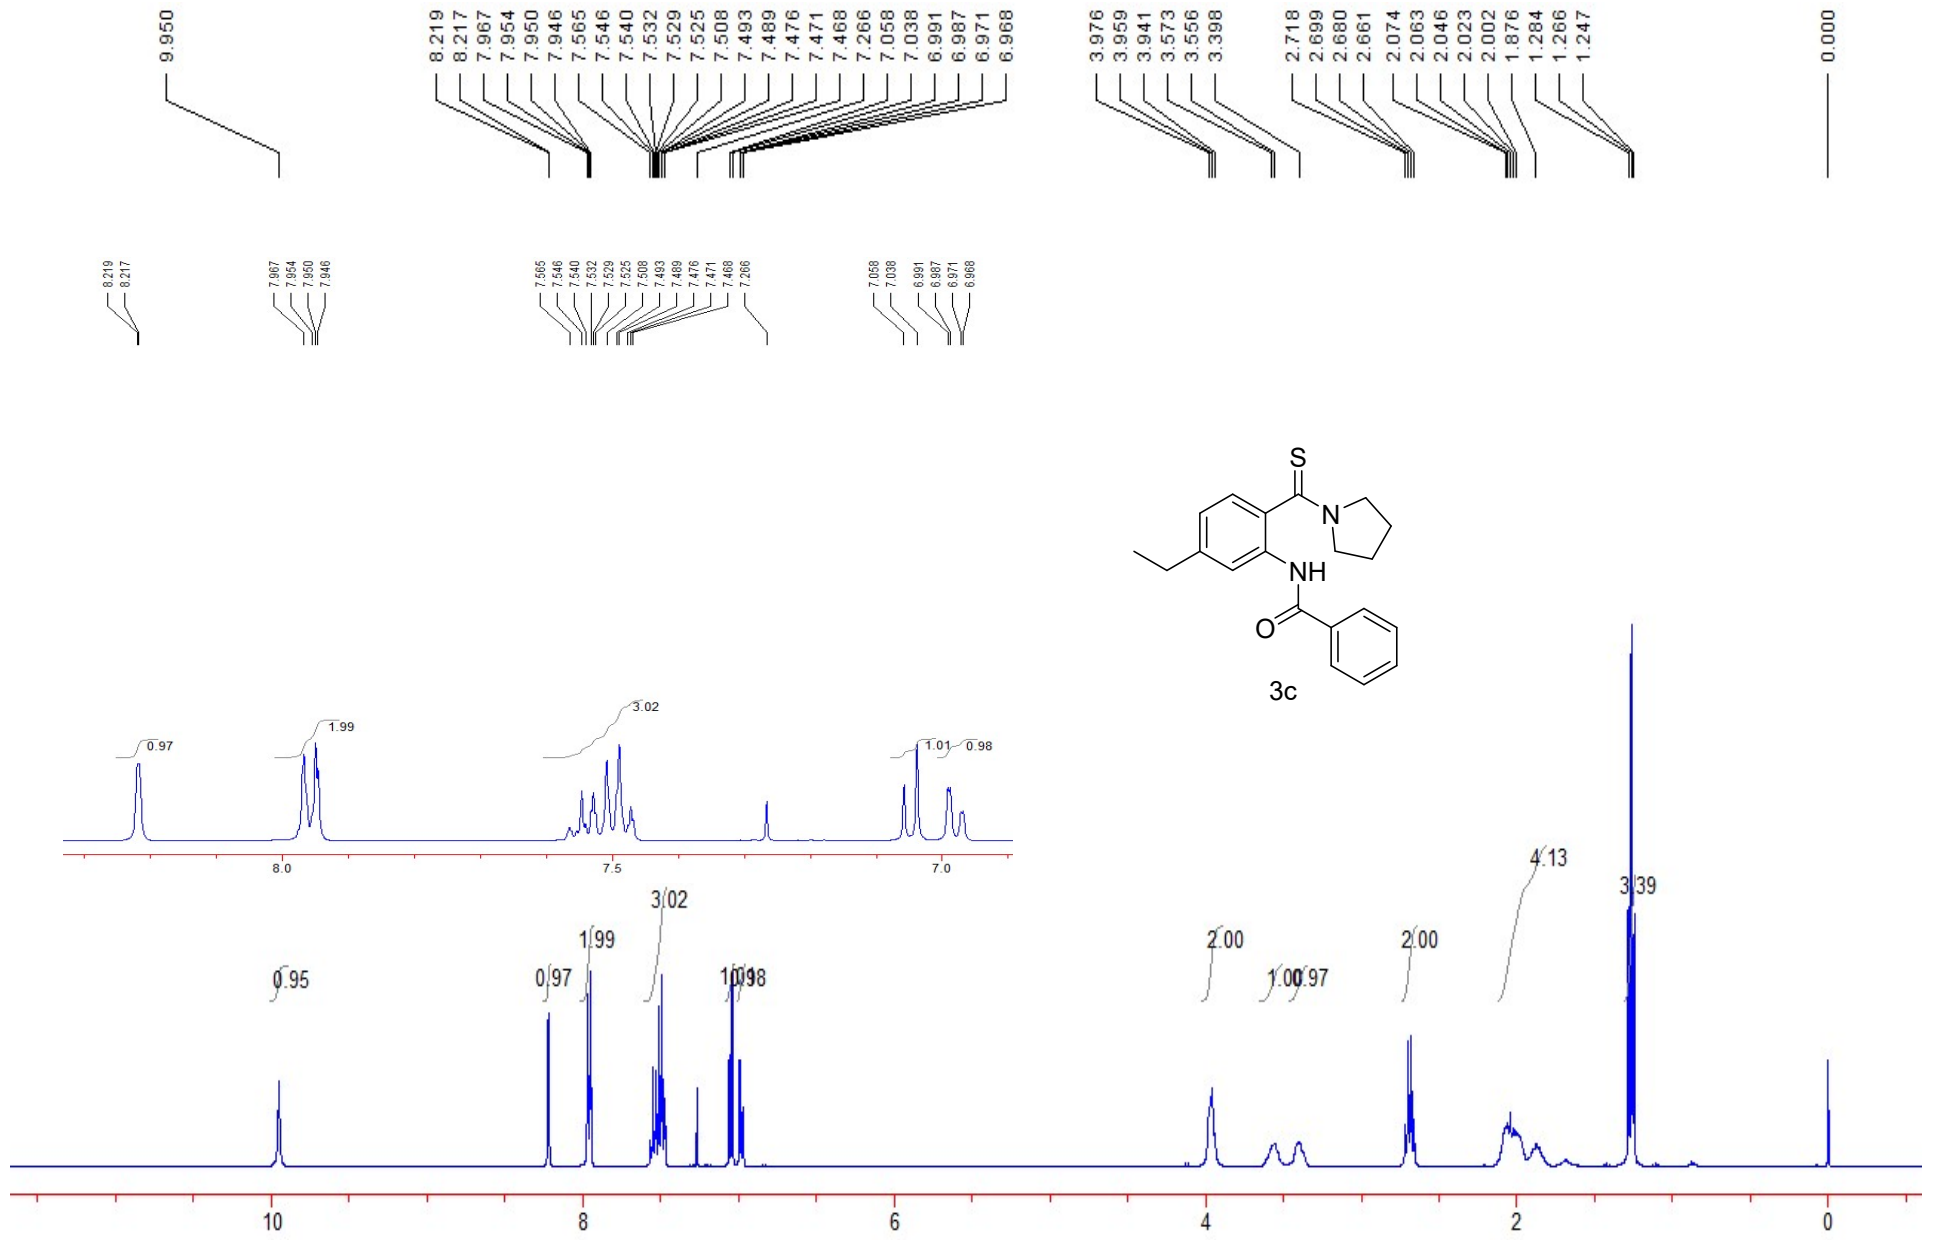

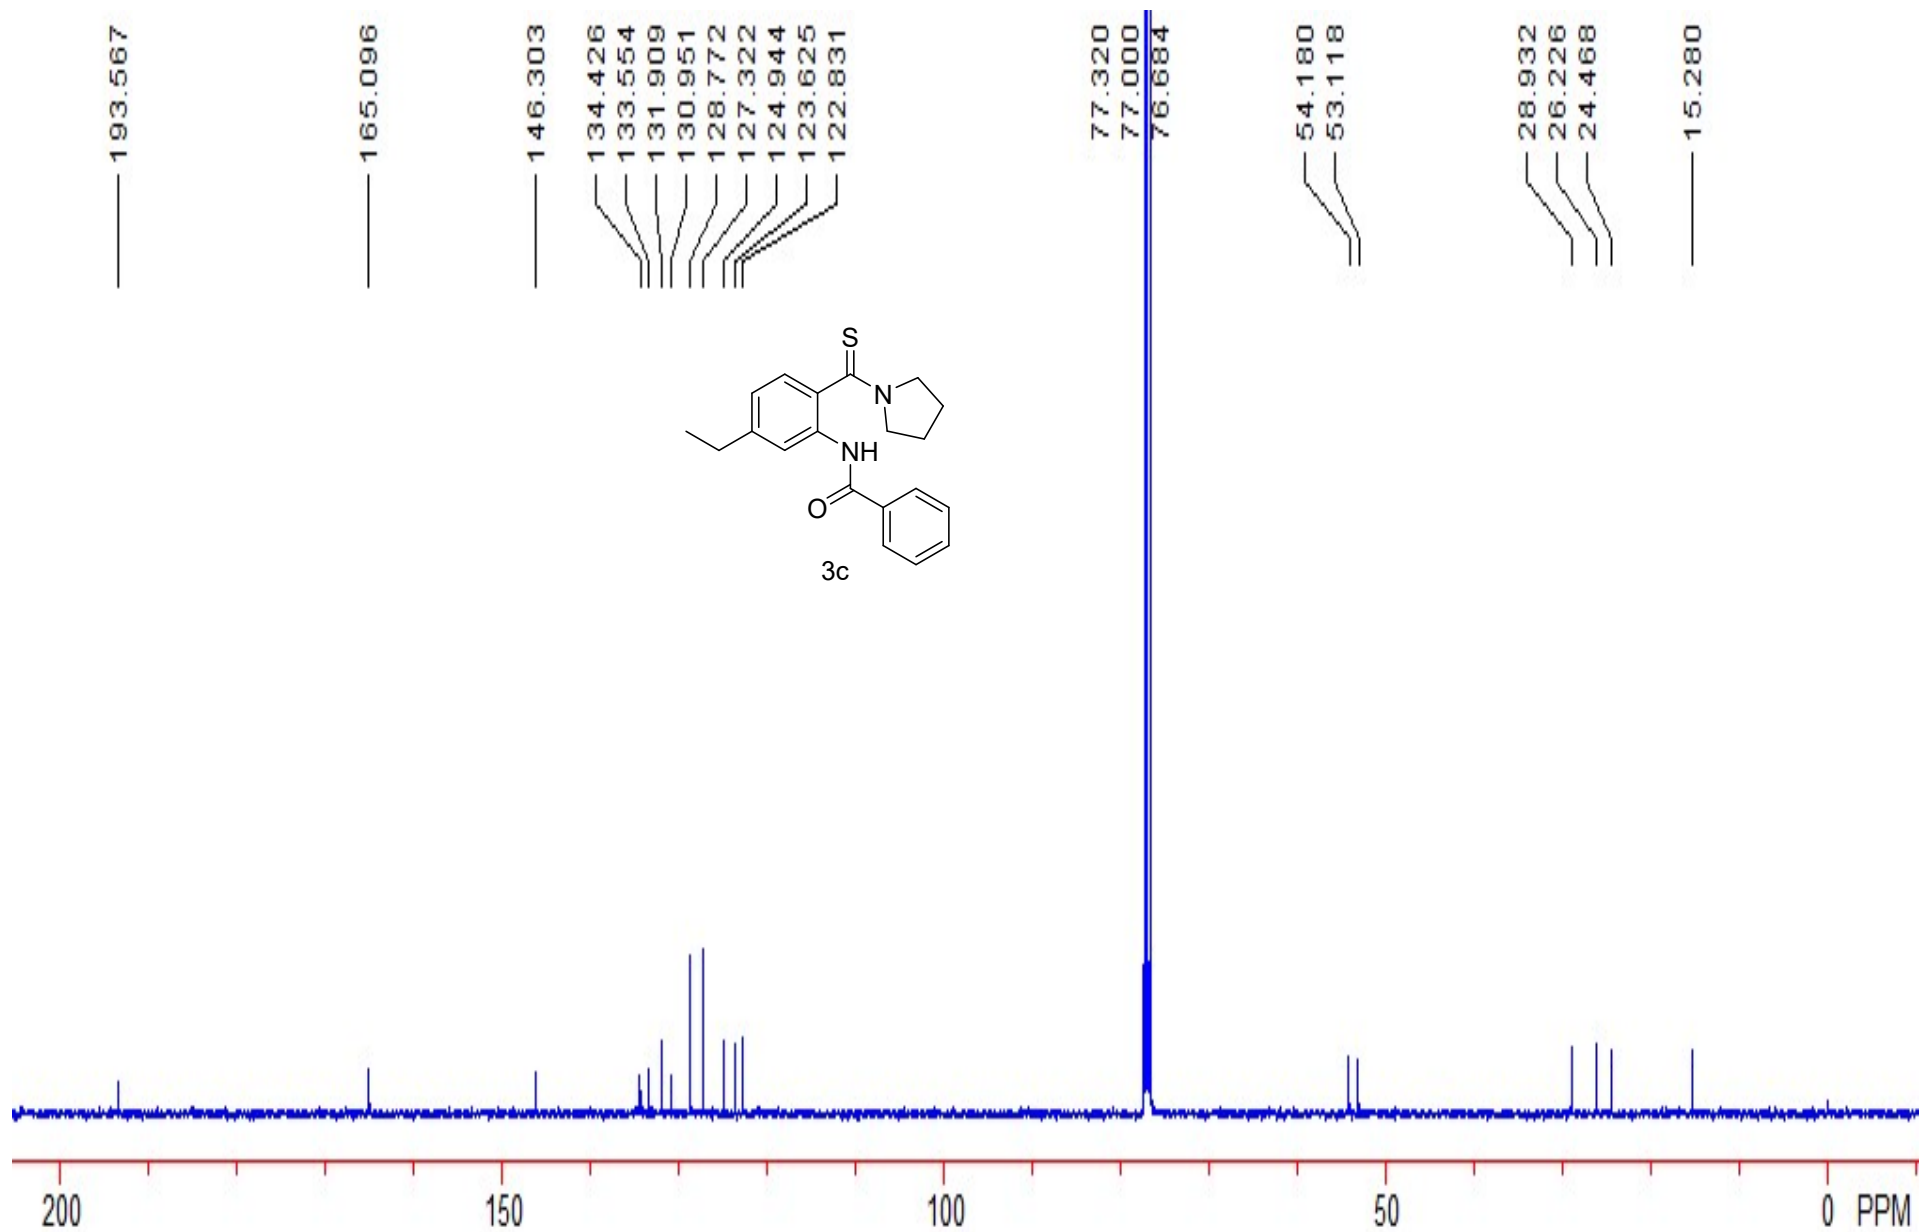

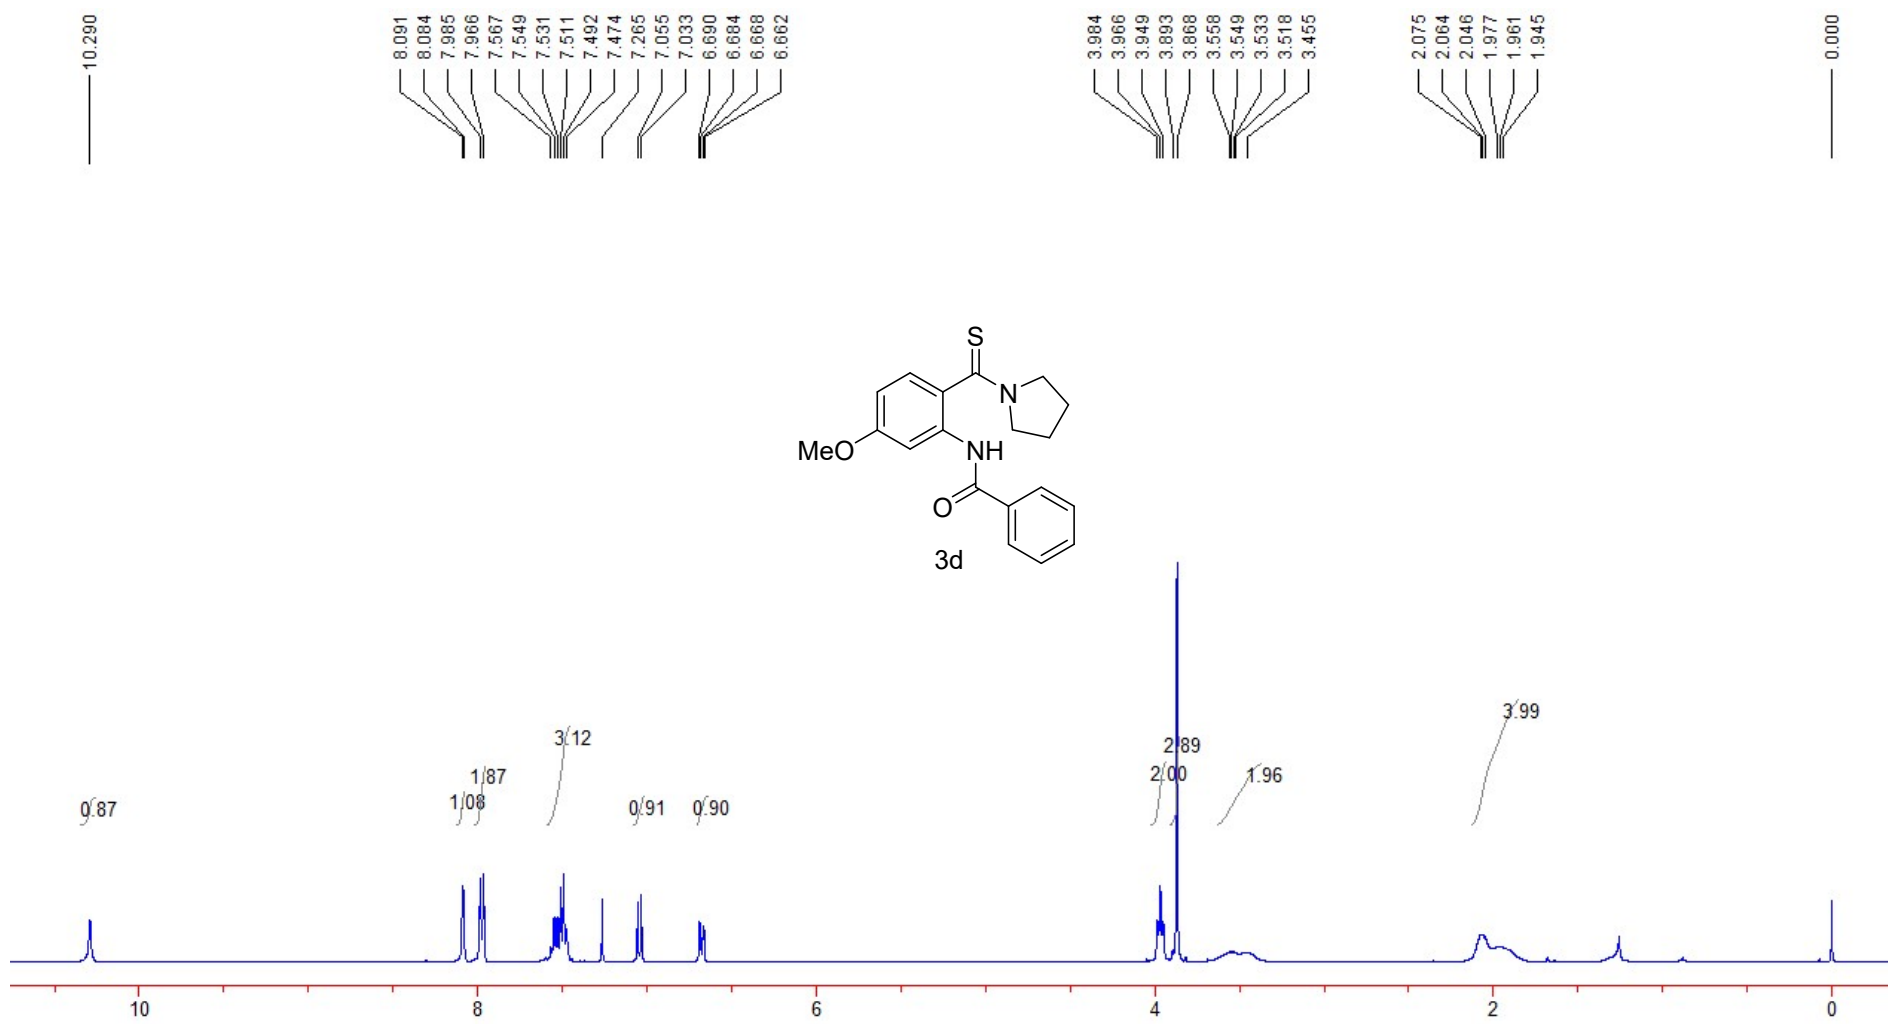

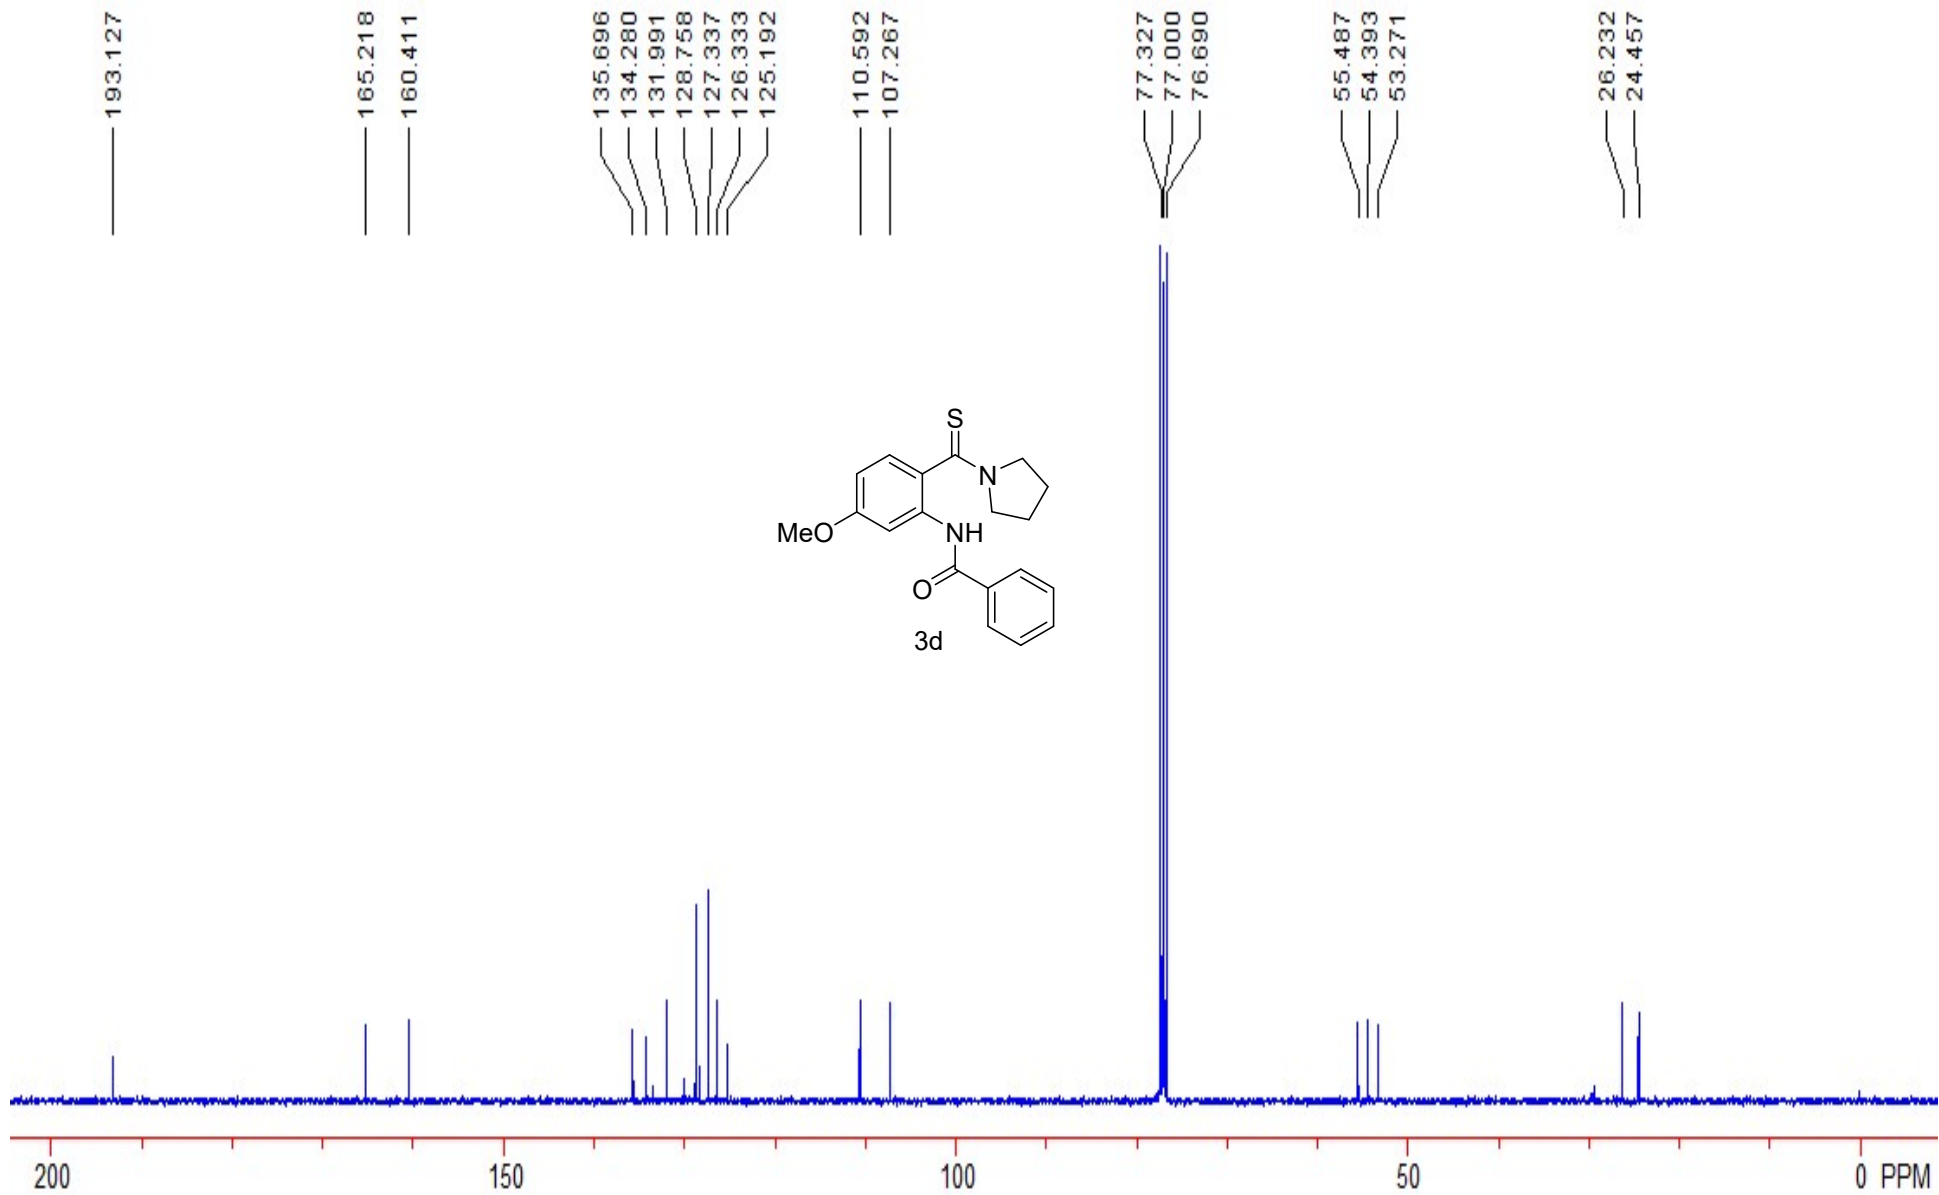

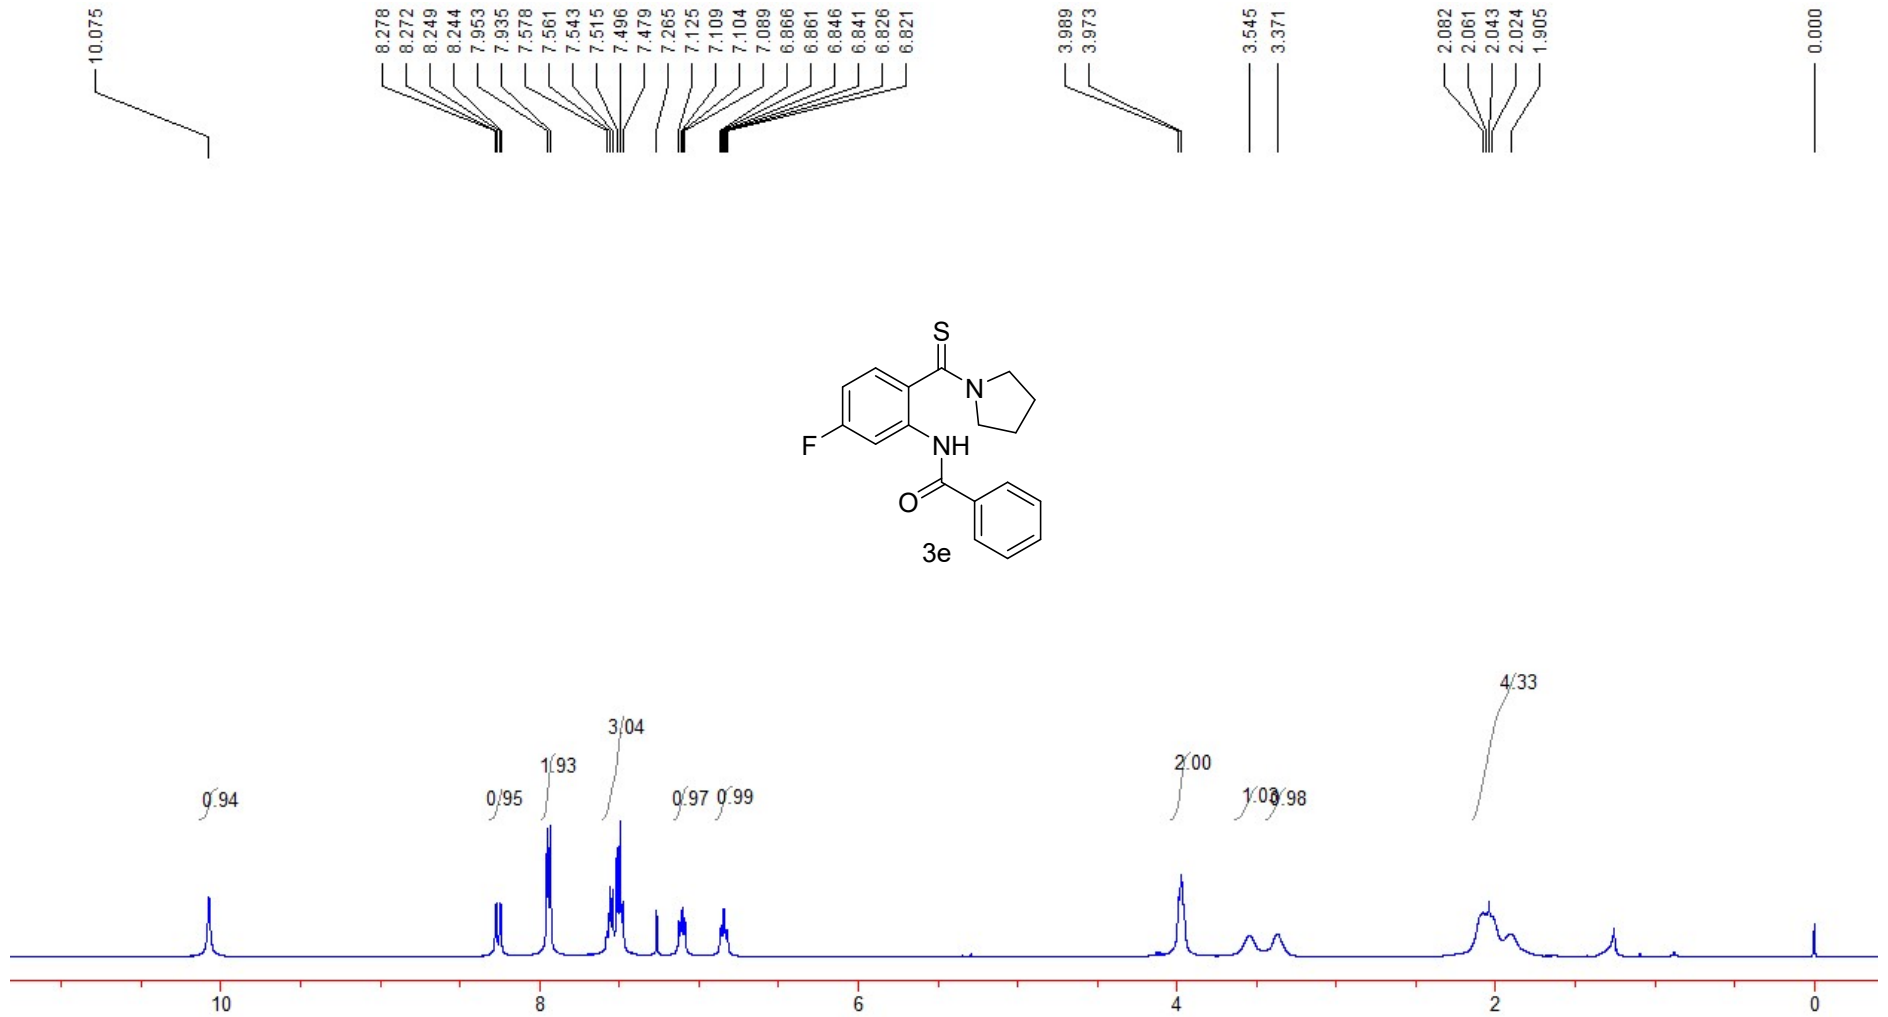

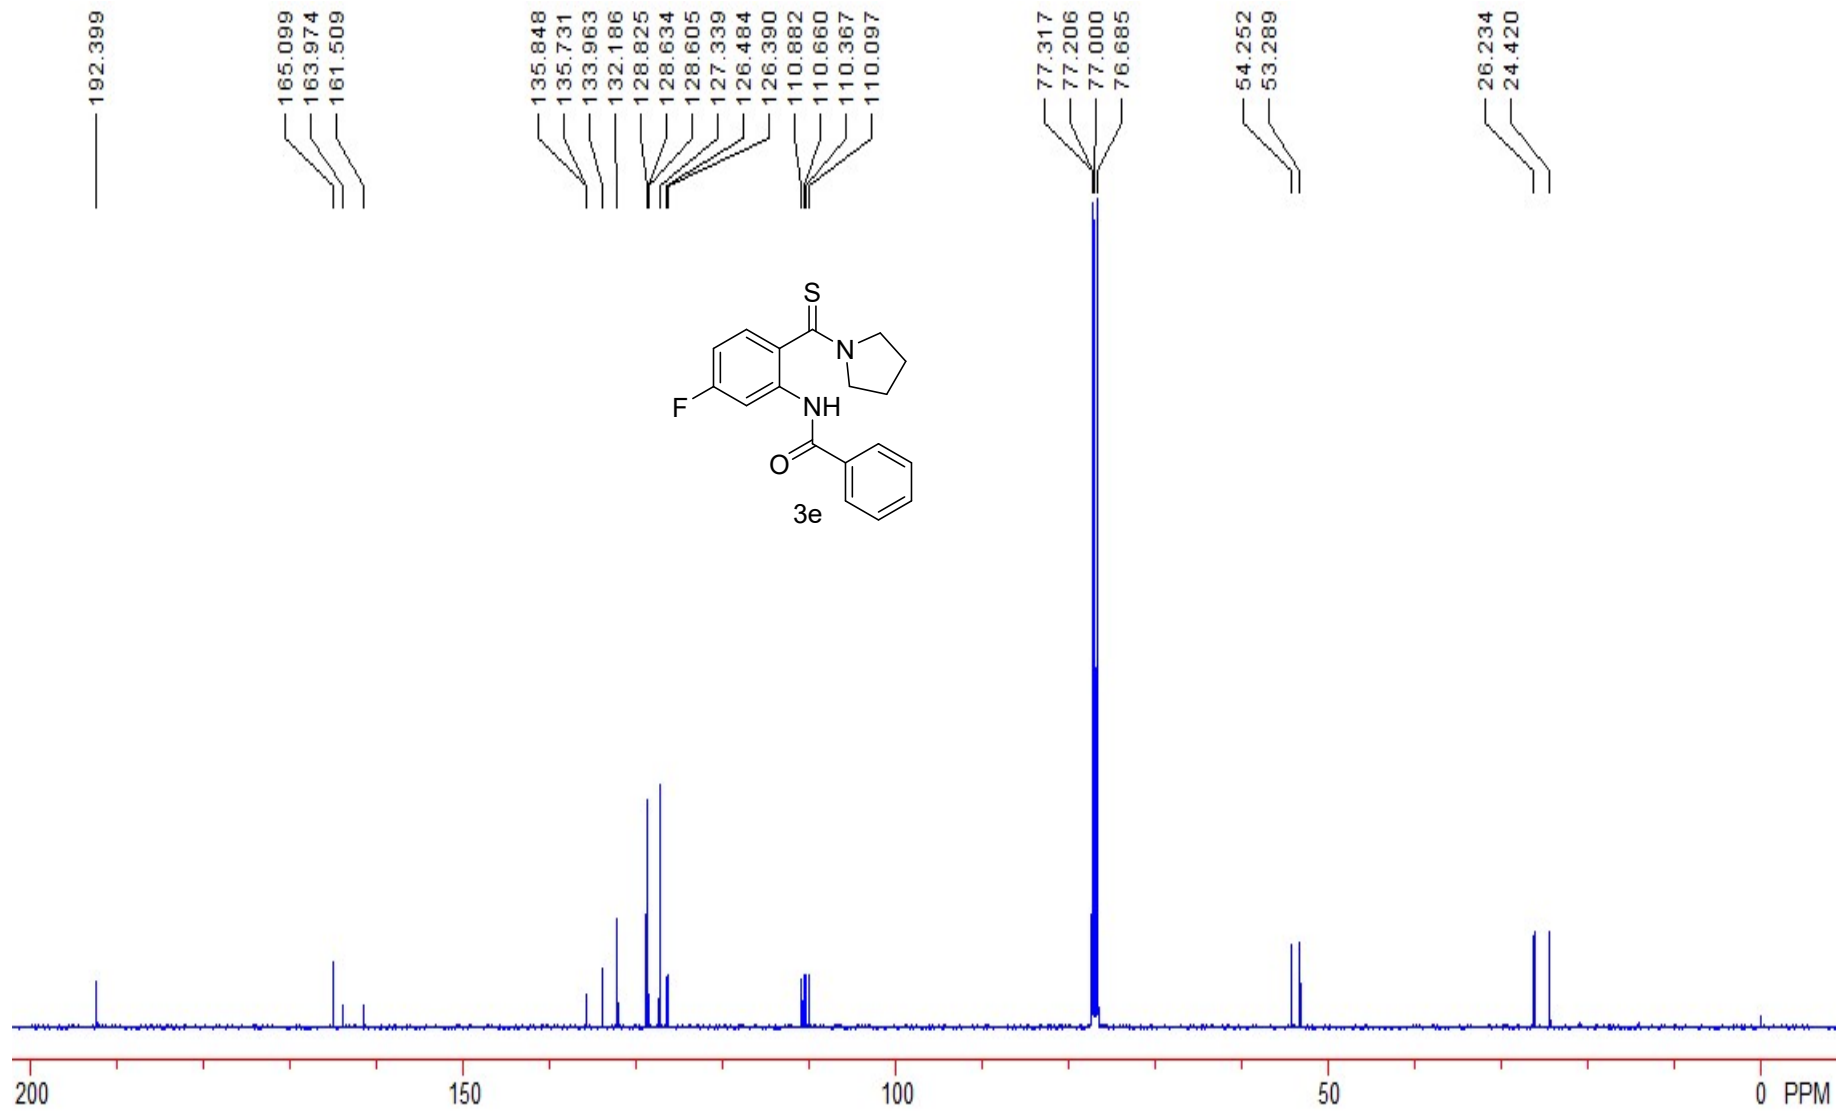



gaopeng-1.560.fid

63.20

109.20

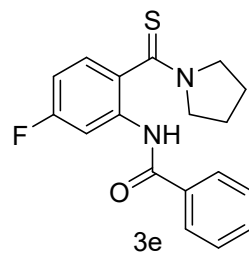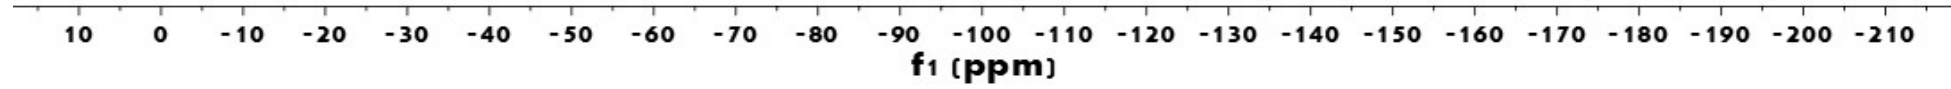

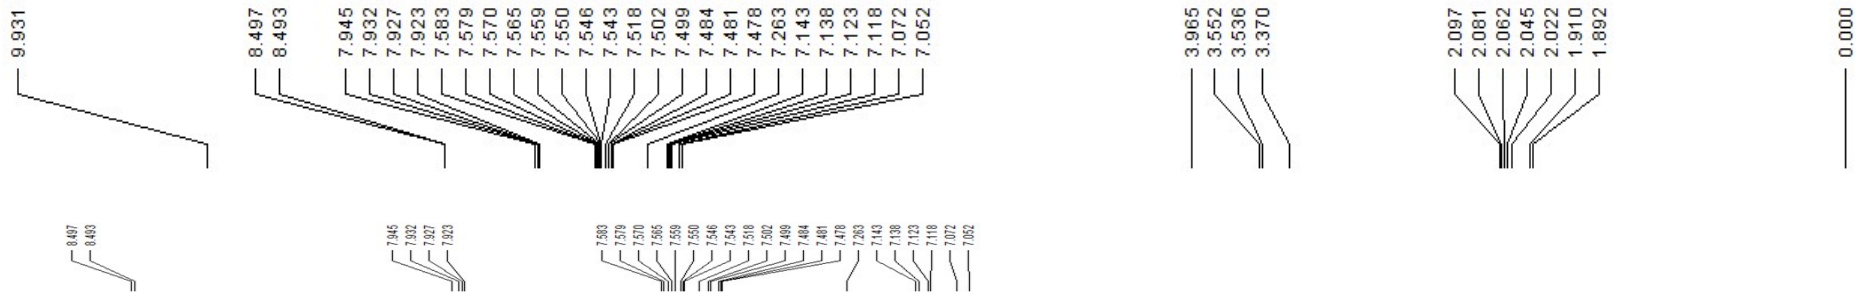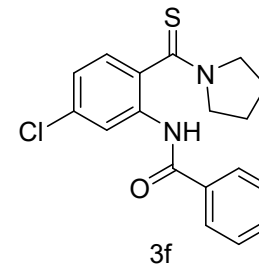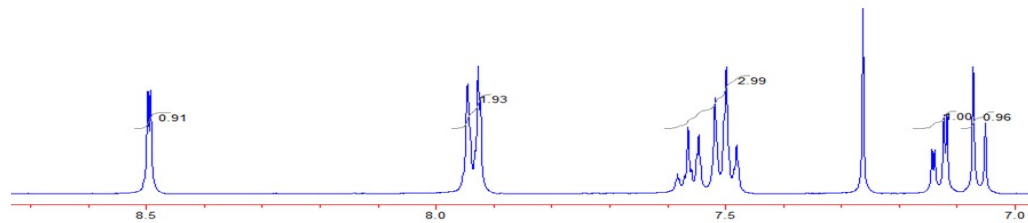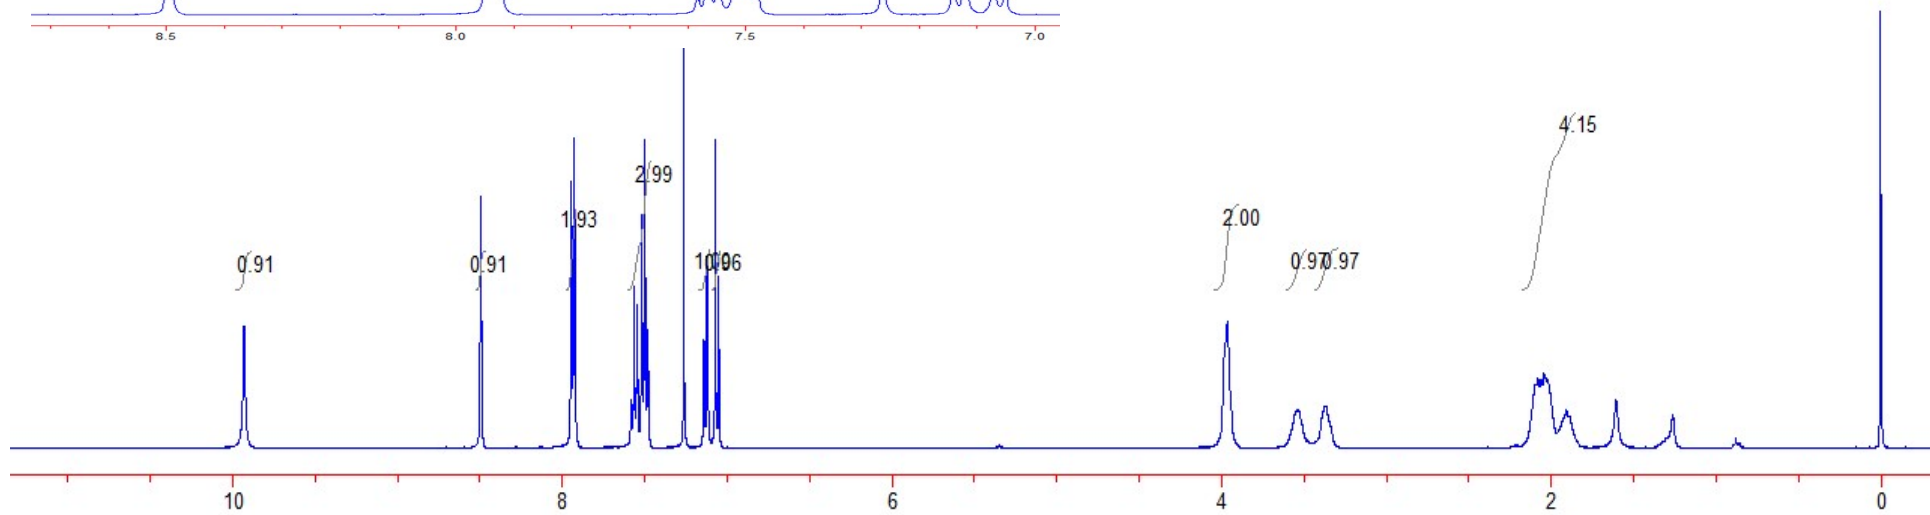

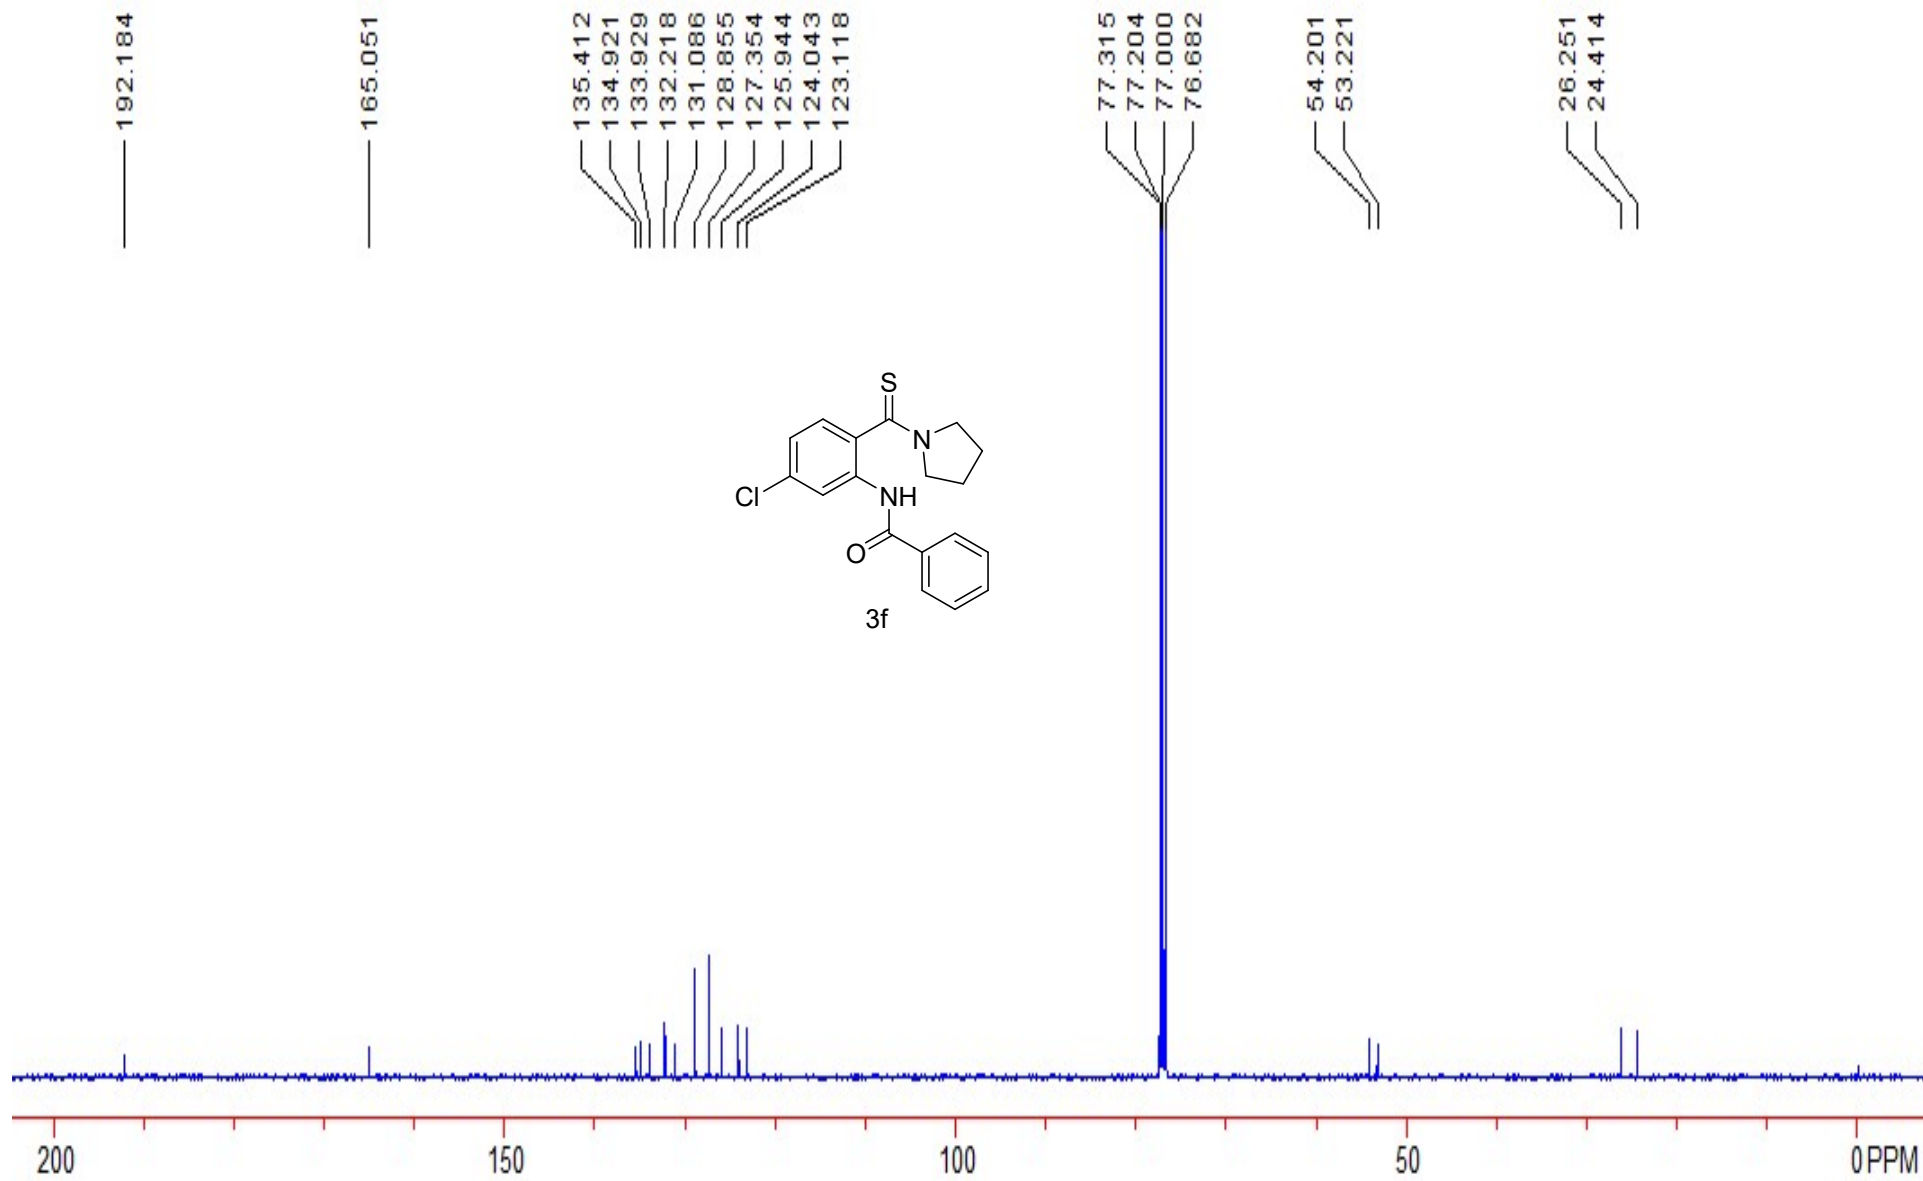

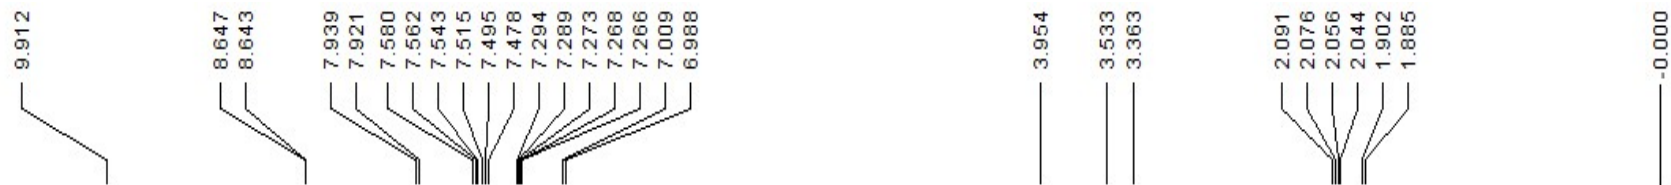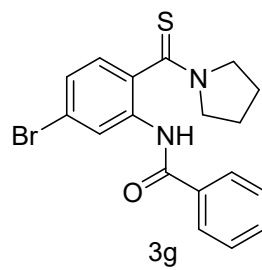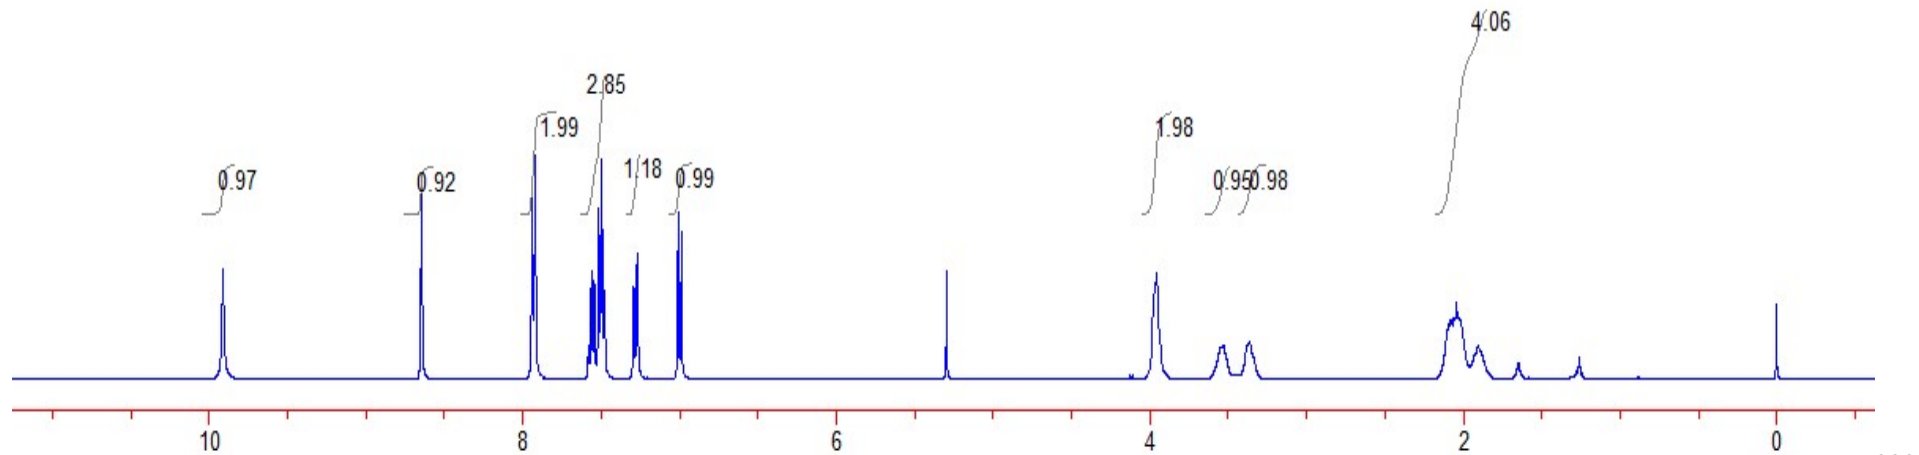

999

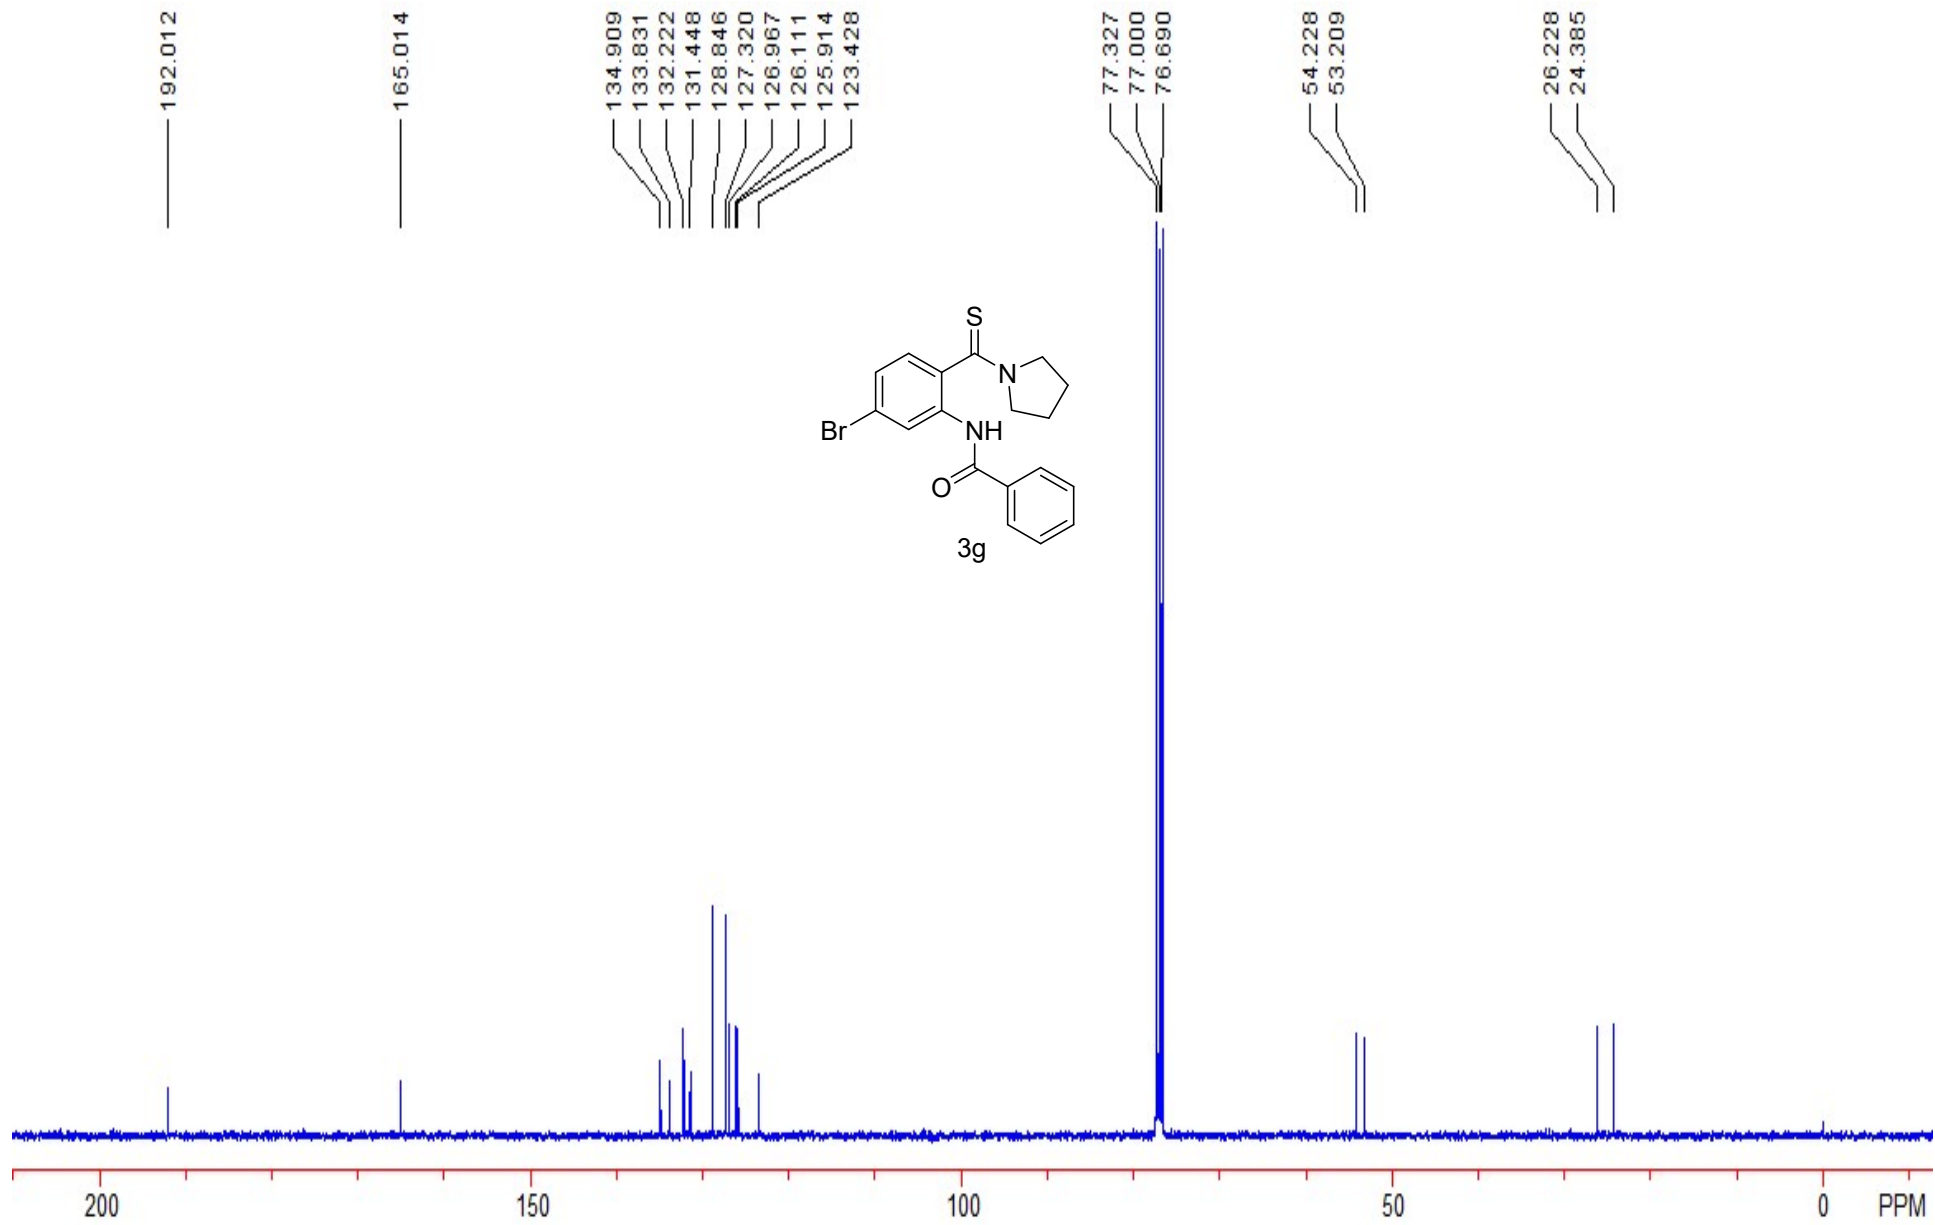

S45

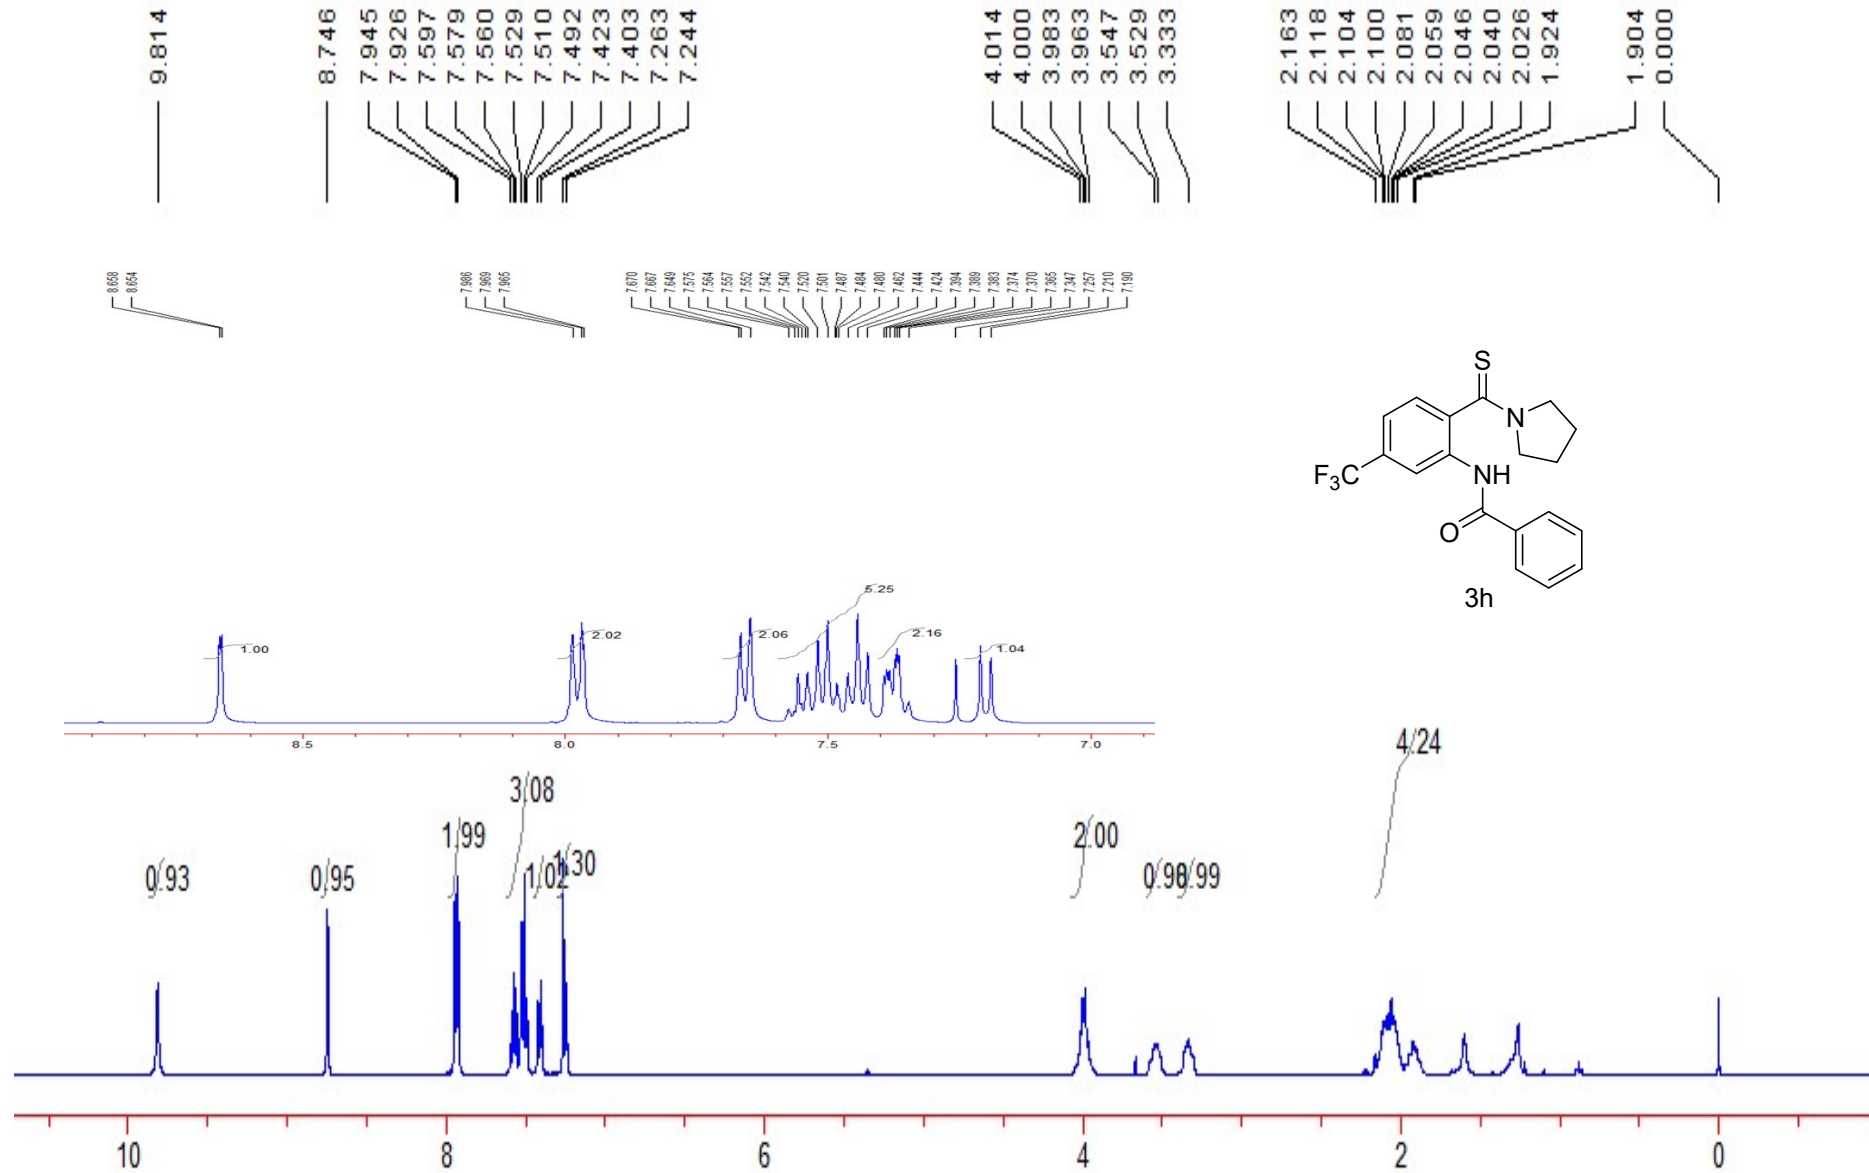

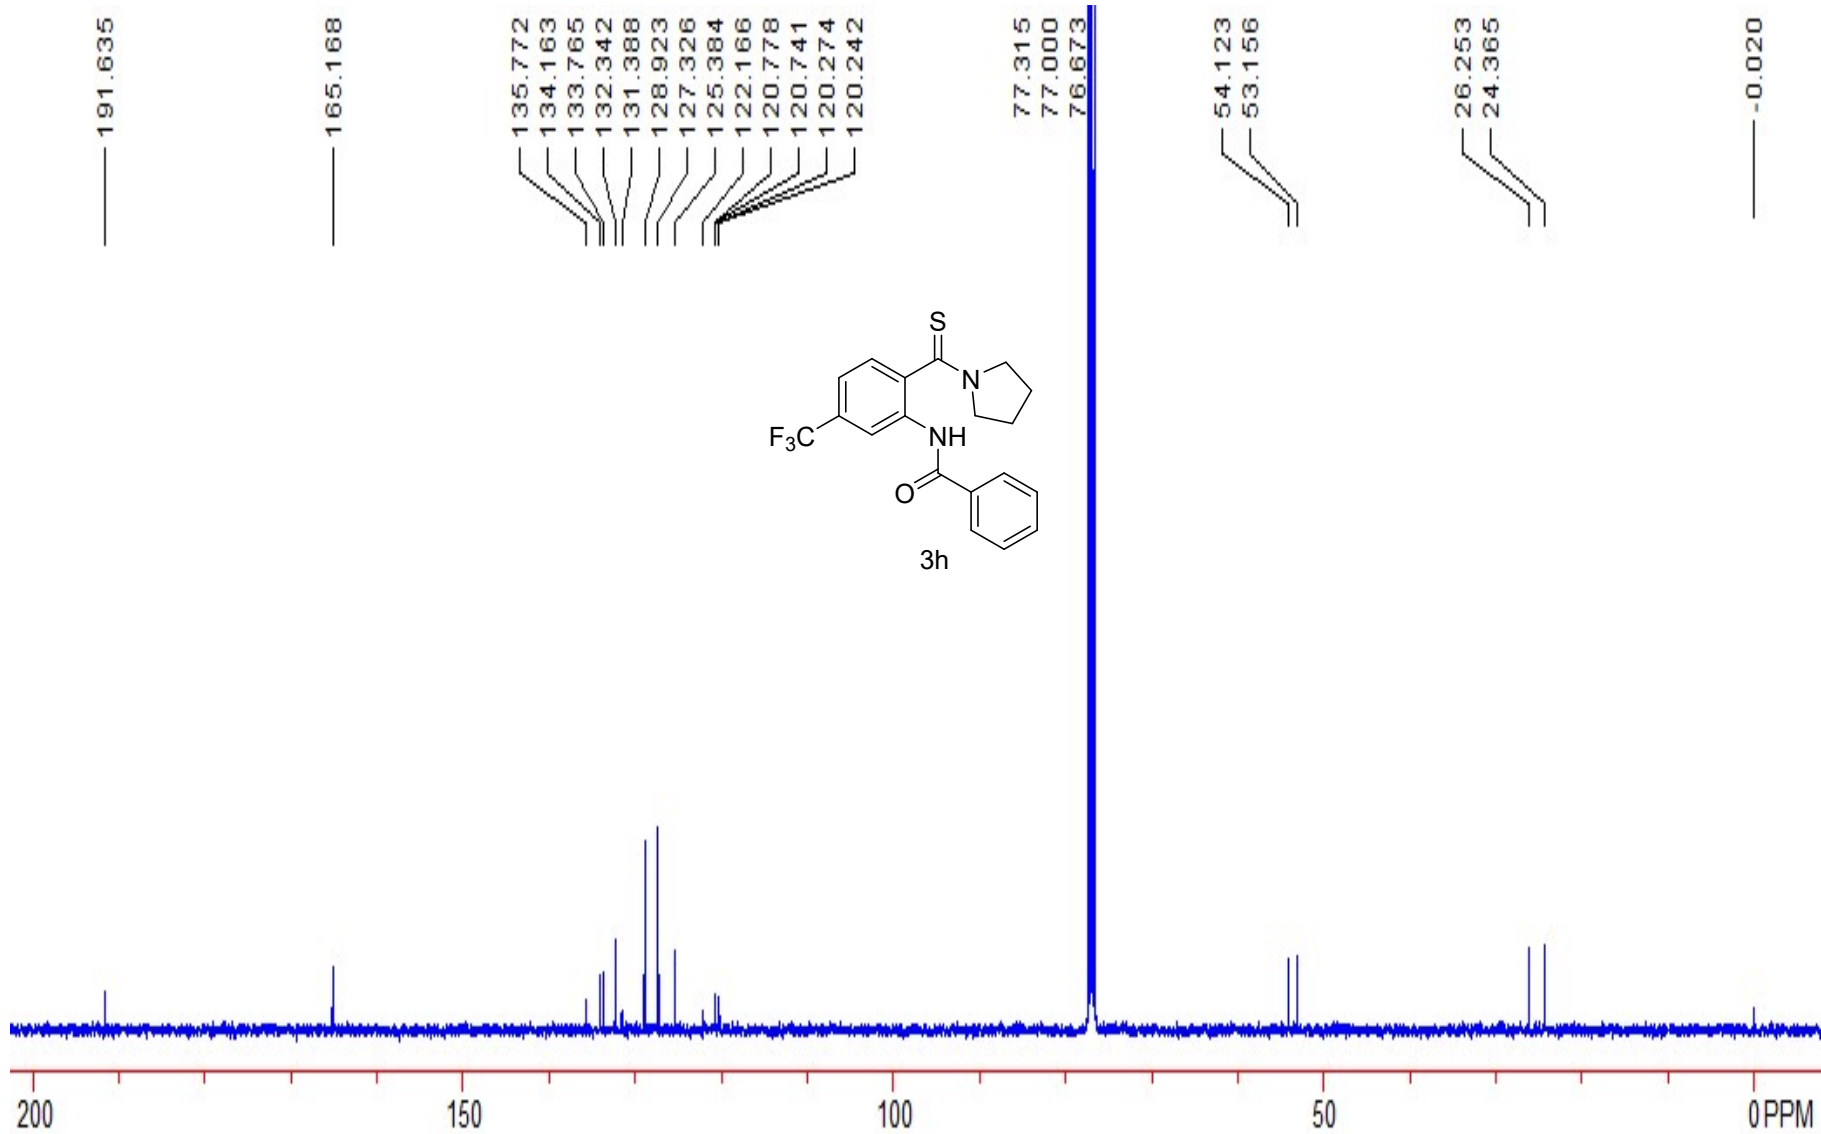

gaopeng-1.566.fid

-63.20  
-63.41

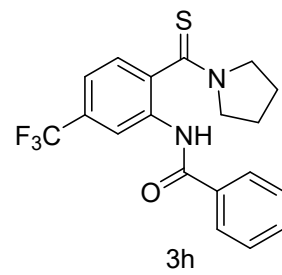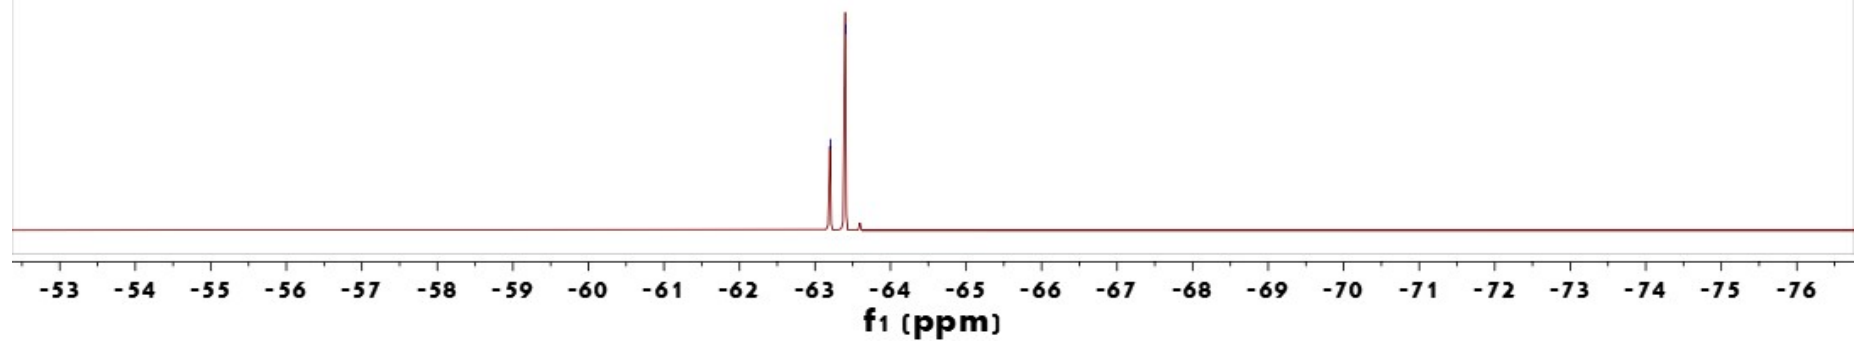



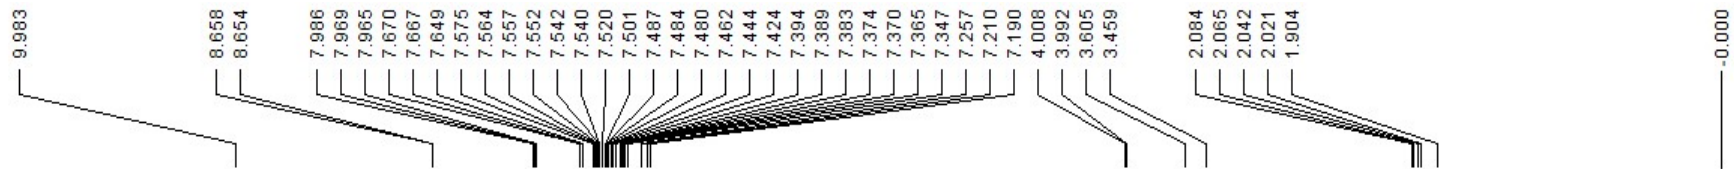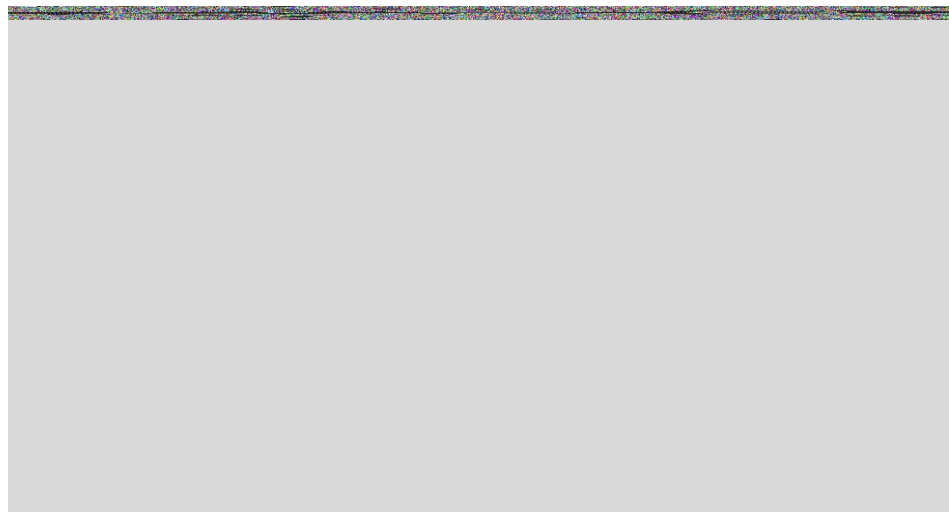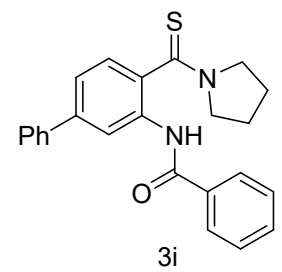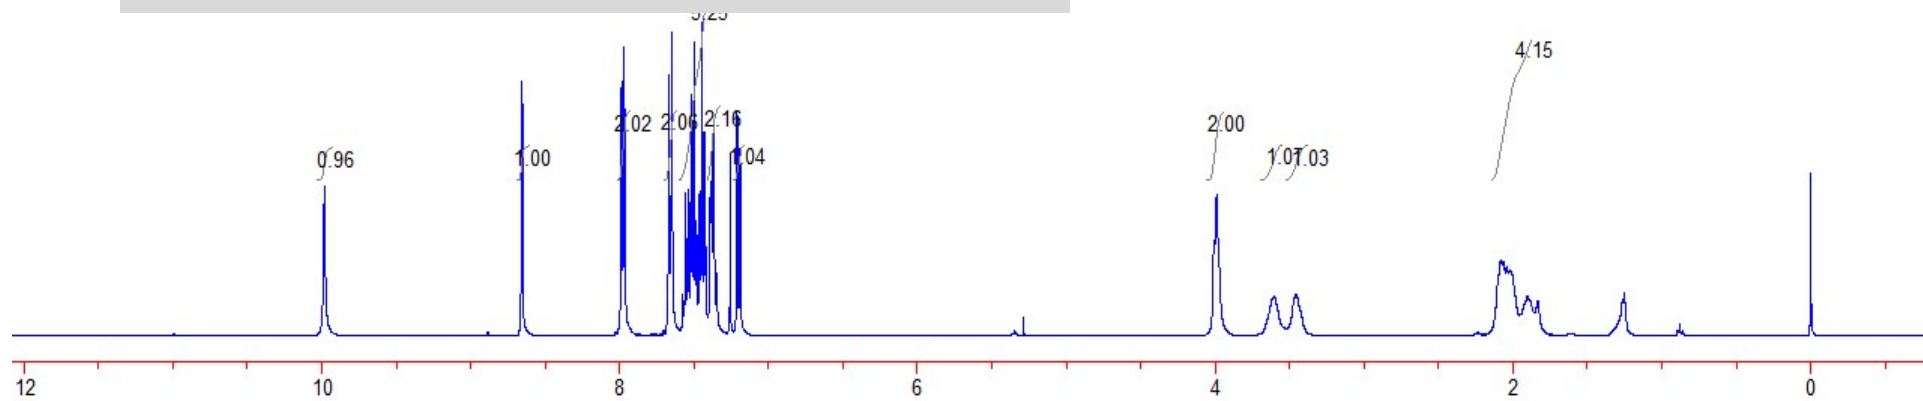

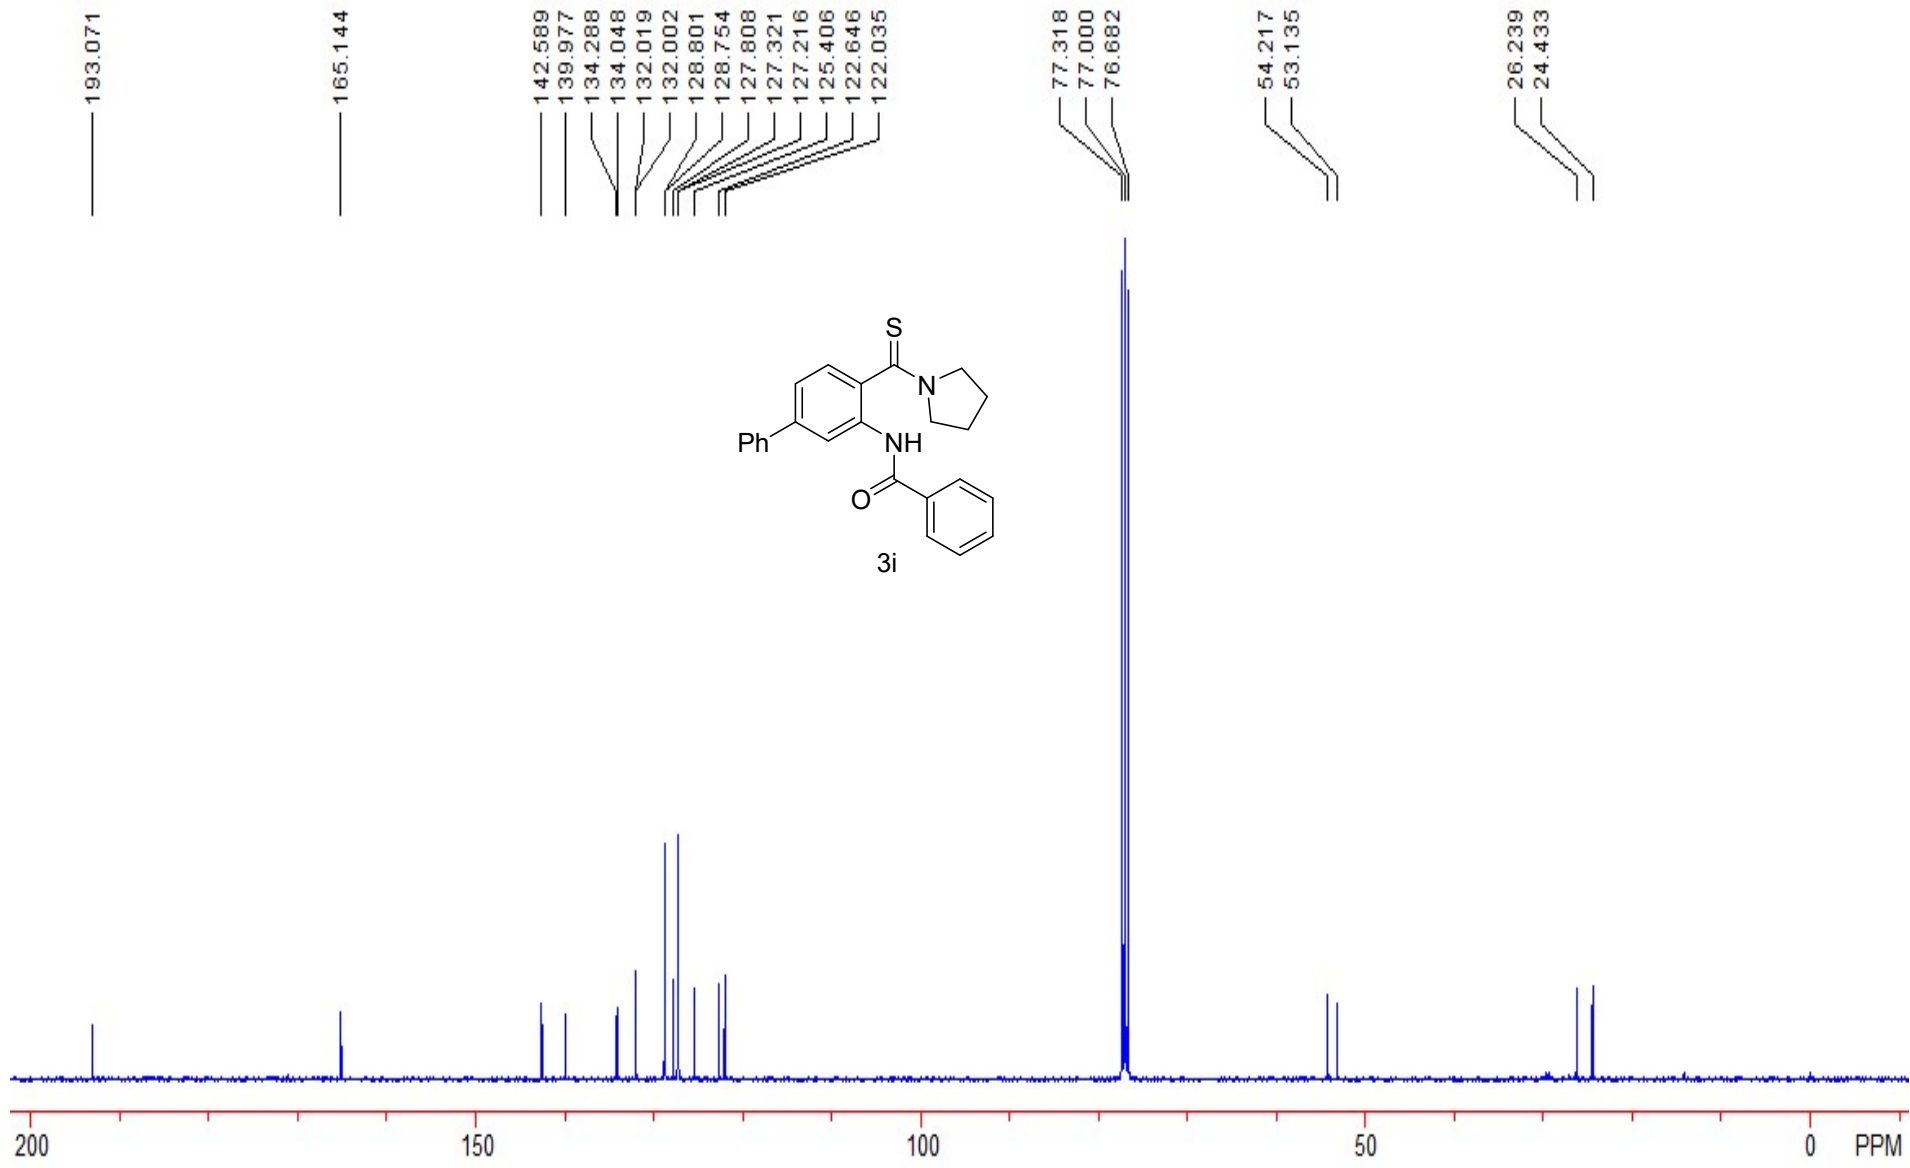

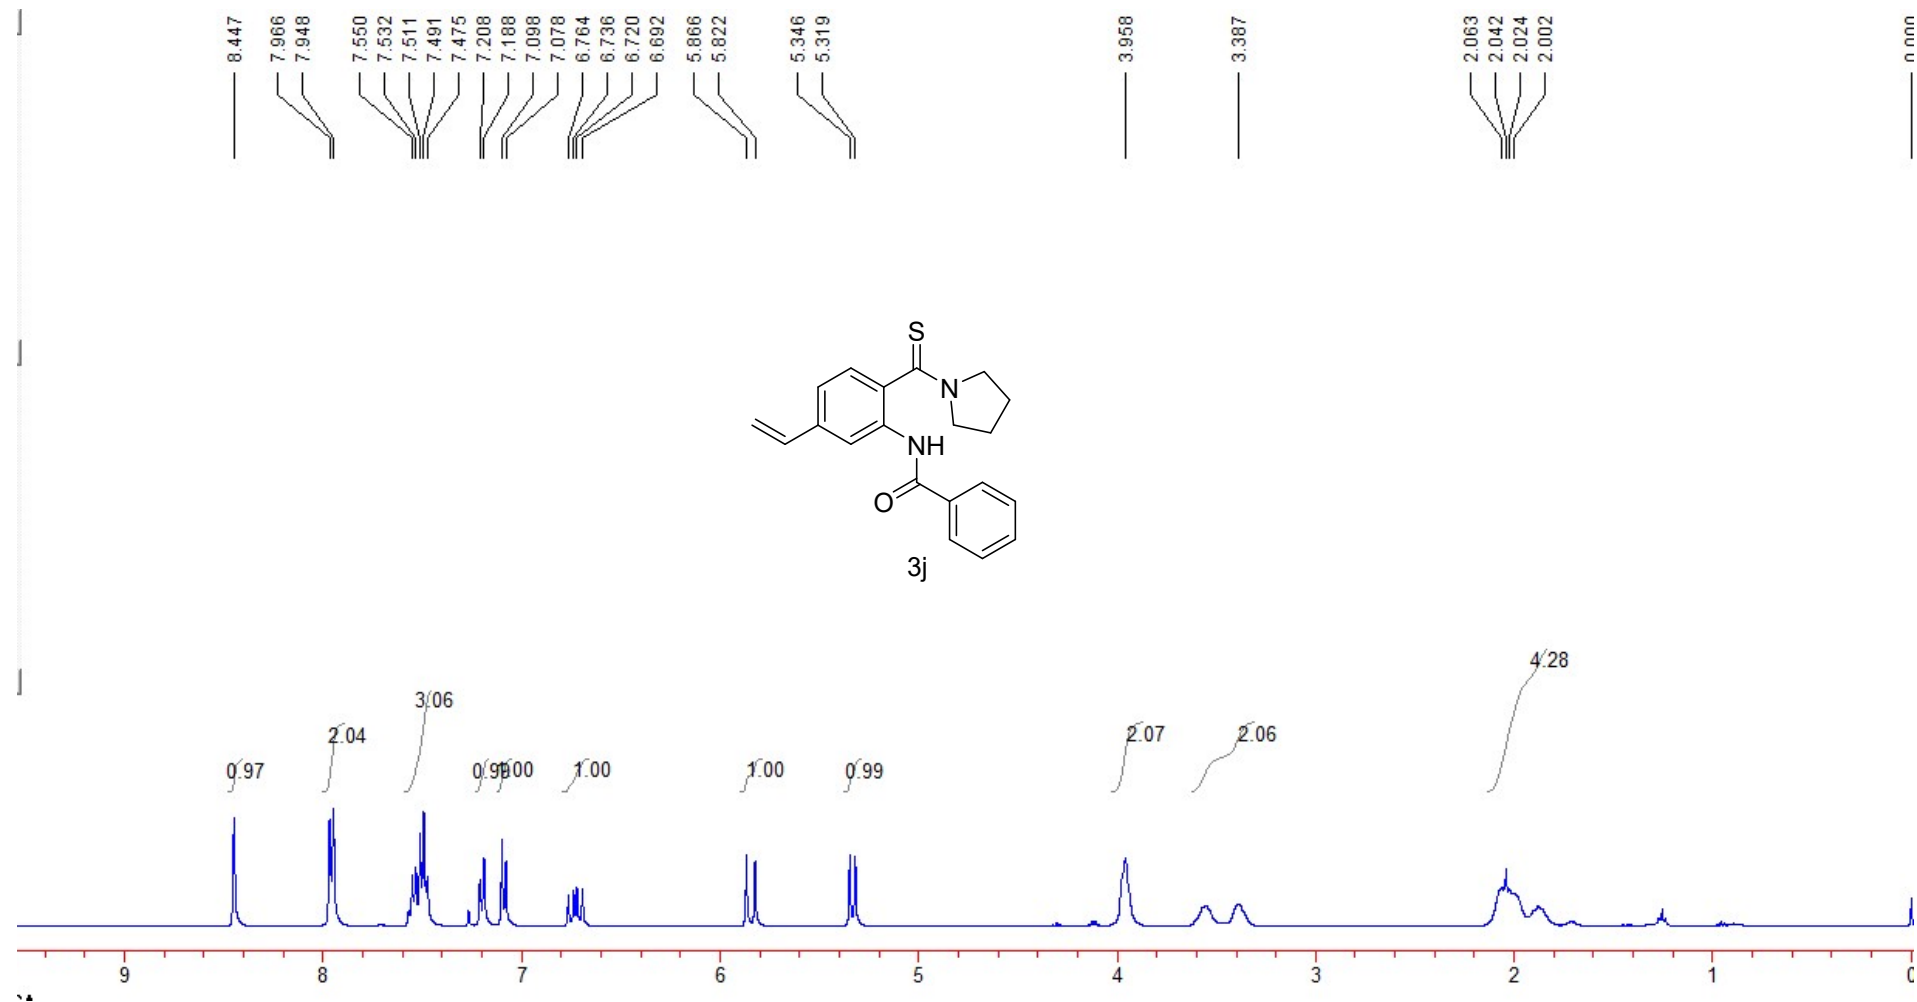

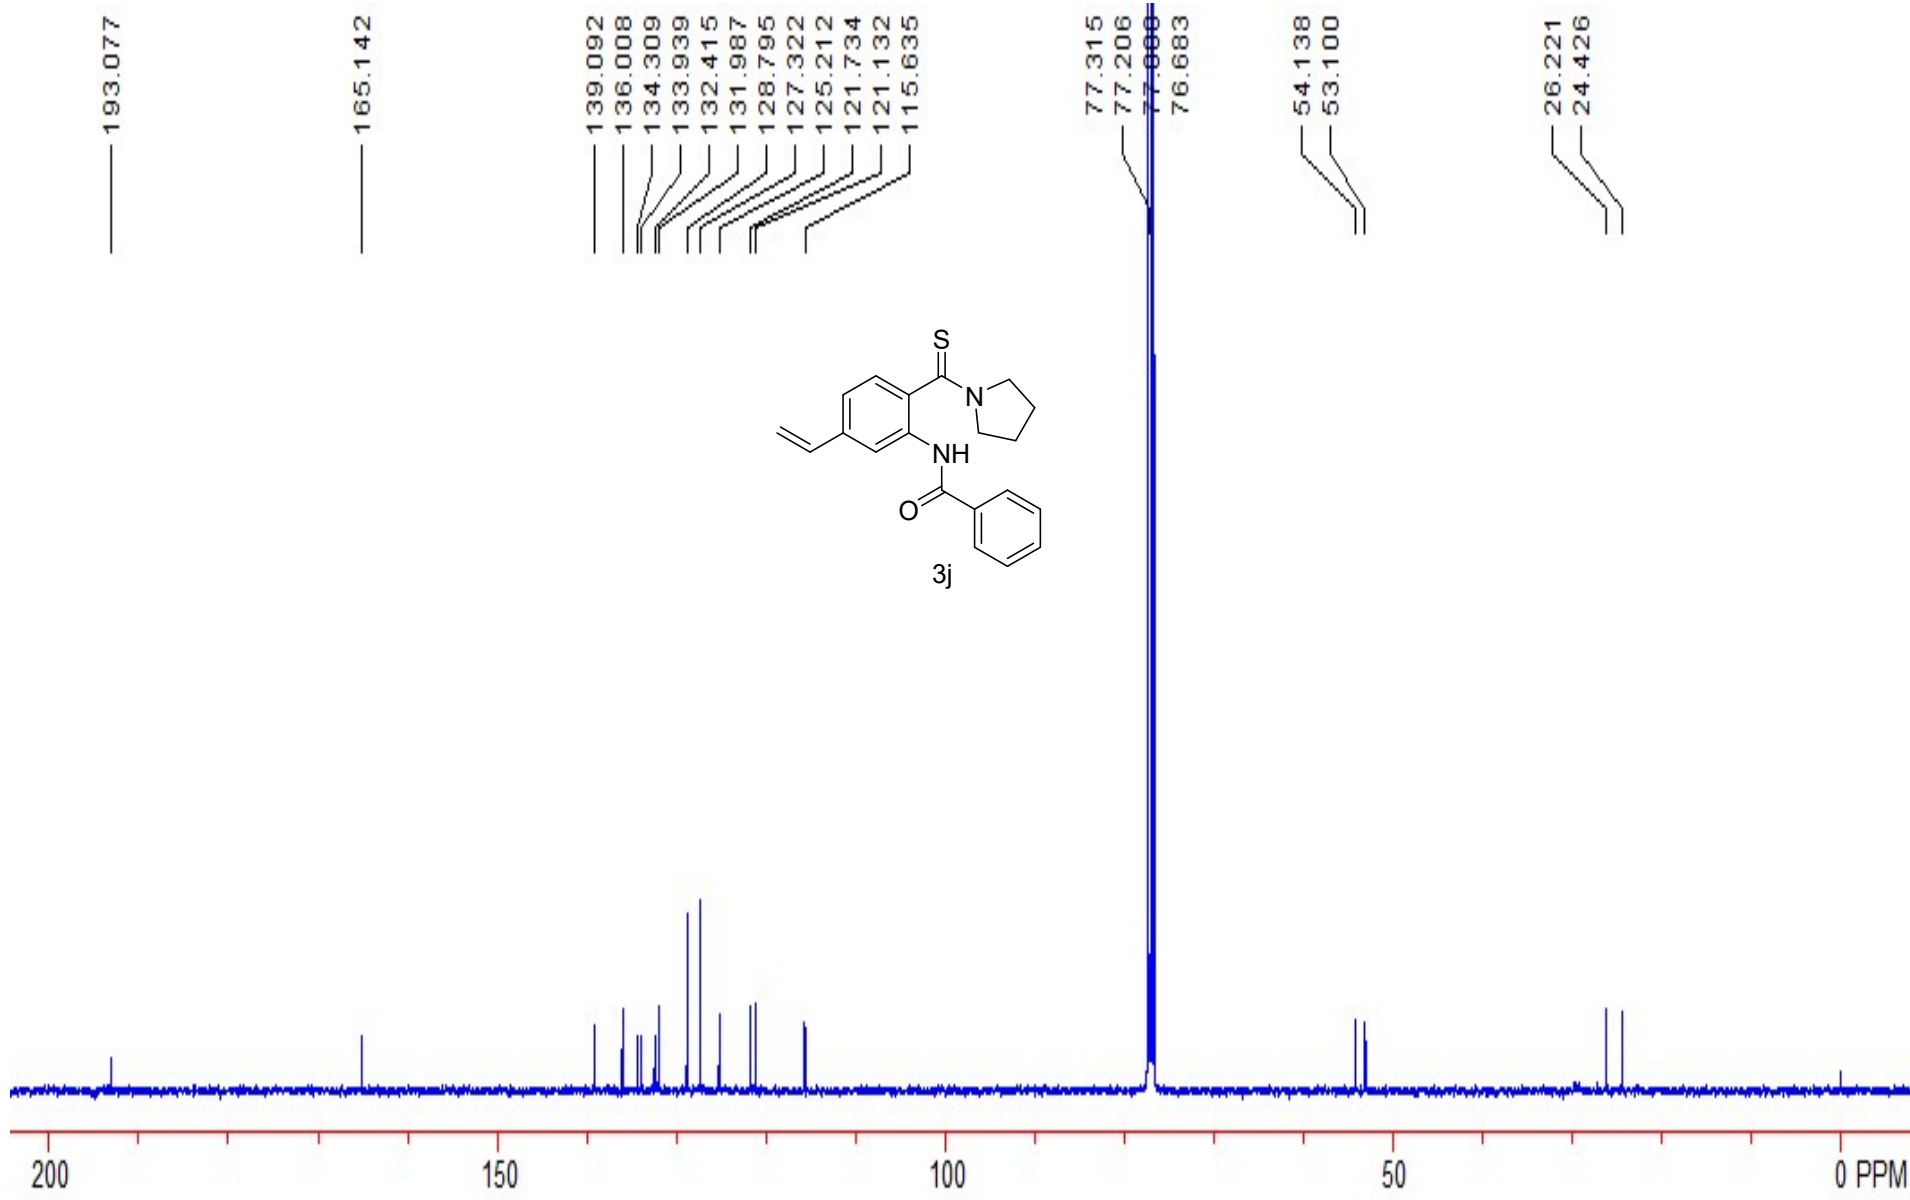

9.564

8.175  
8.154  
7.935  
7.916  
7.540  
7.522  
7.501  
7.482  
7.464  
7.264  
7.215  
7.194  
6.944

3.983  
3.970  
3.953  
3.935  
3.554  
3.534  
3.383  
3.374  
3.366

2.079  
2.334  
2.064  
2.046  
2.027  
2.008  
1.985  
1.885  
1.865

0.000

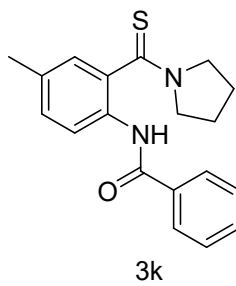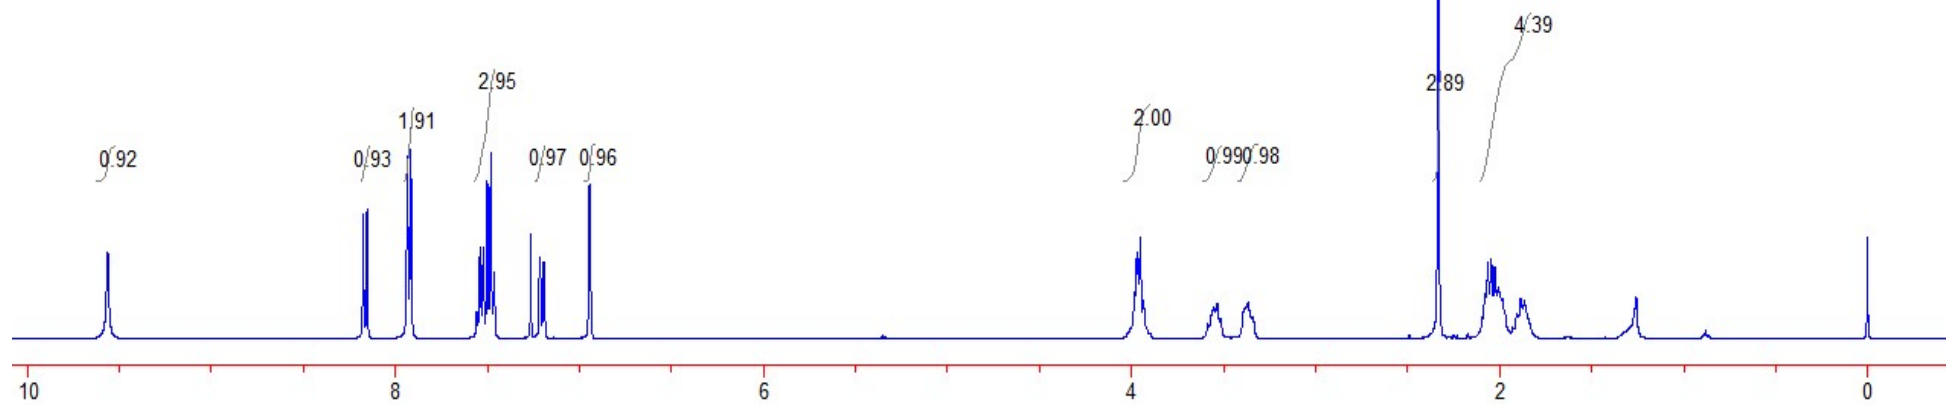

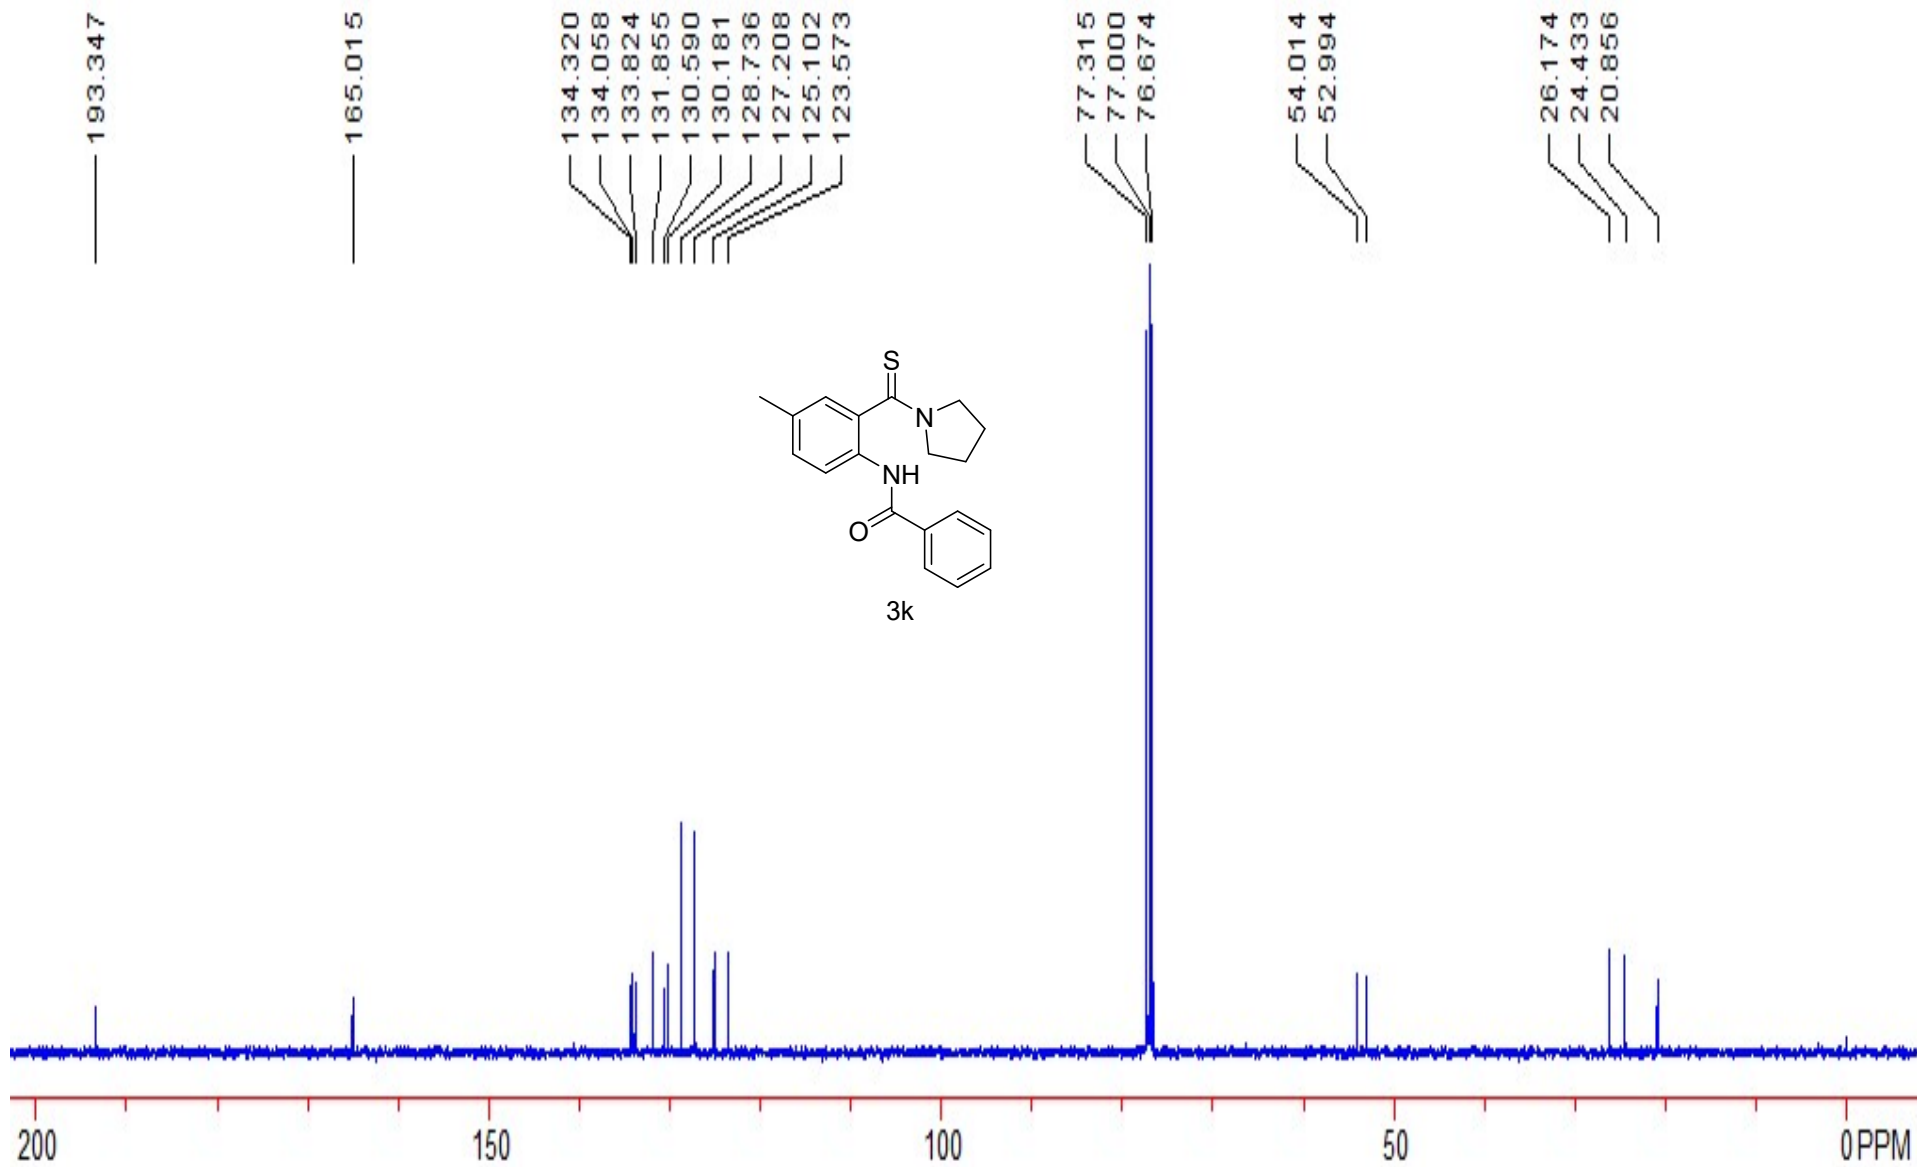

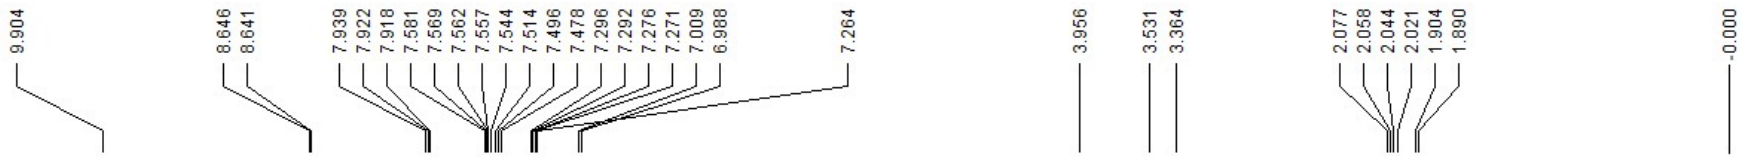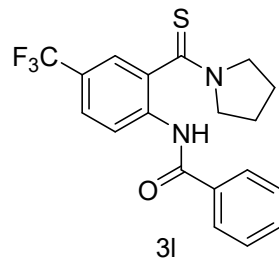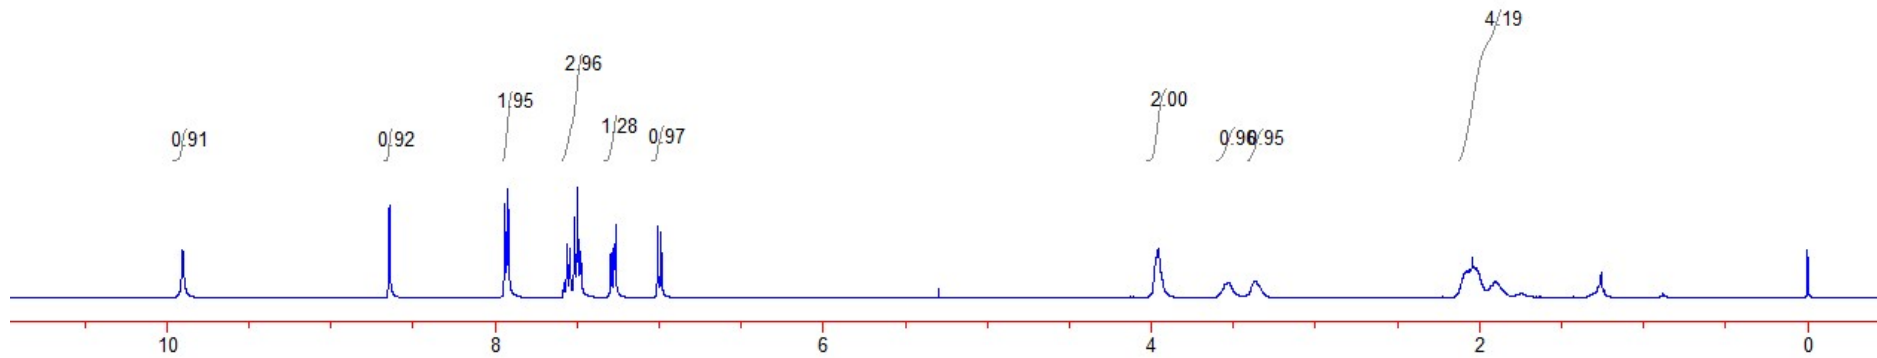

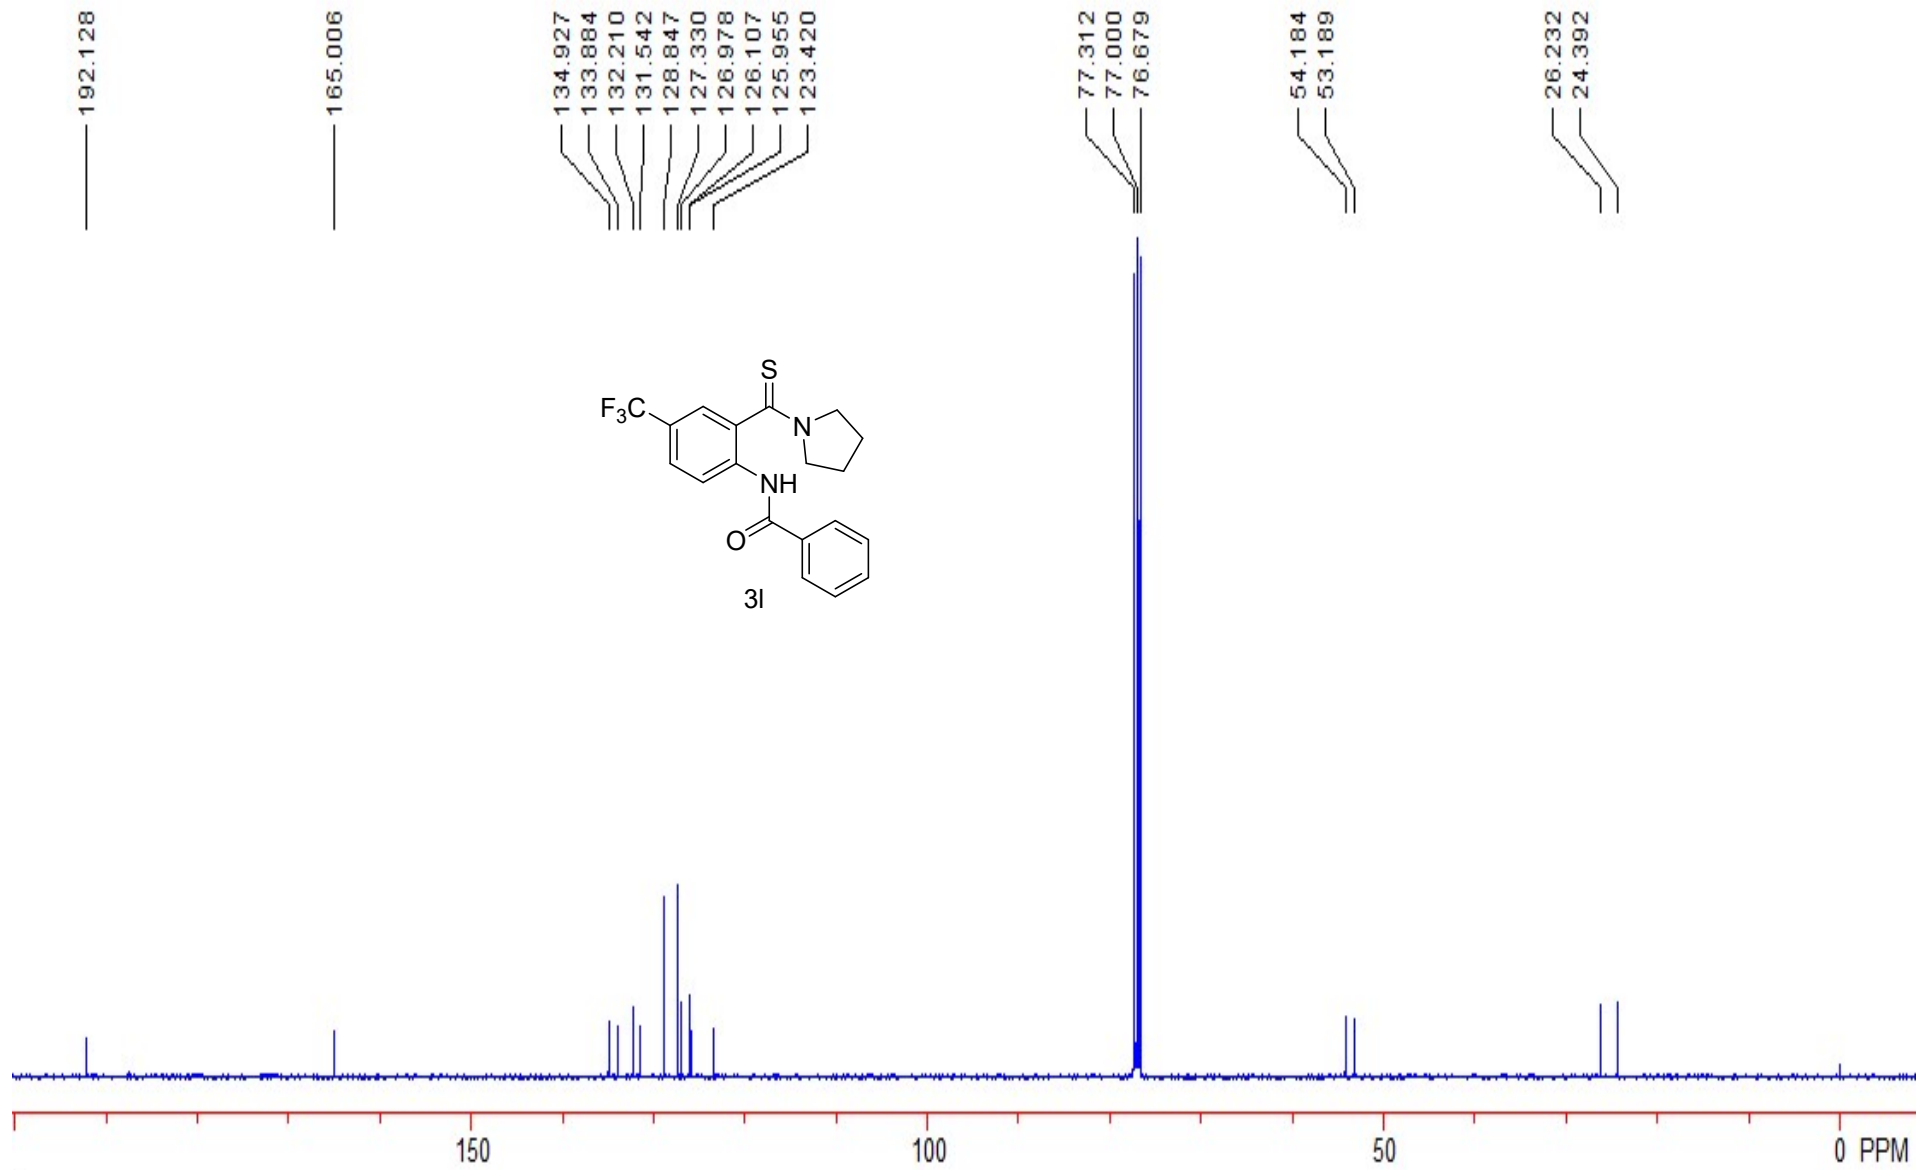



gaopeng-1.561.fid

62.63  
63.20

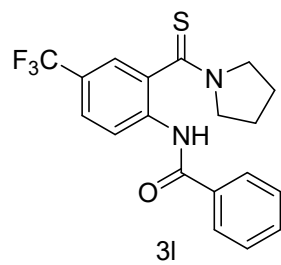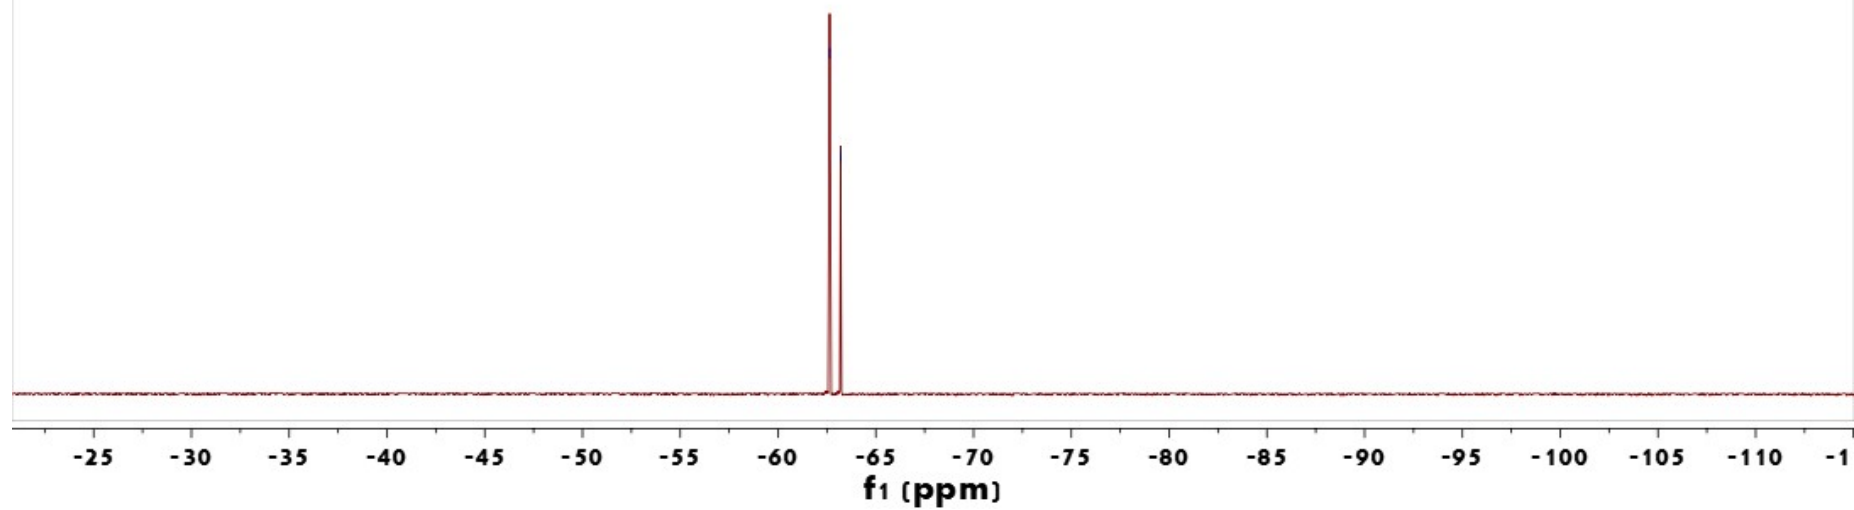

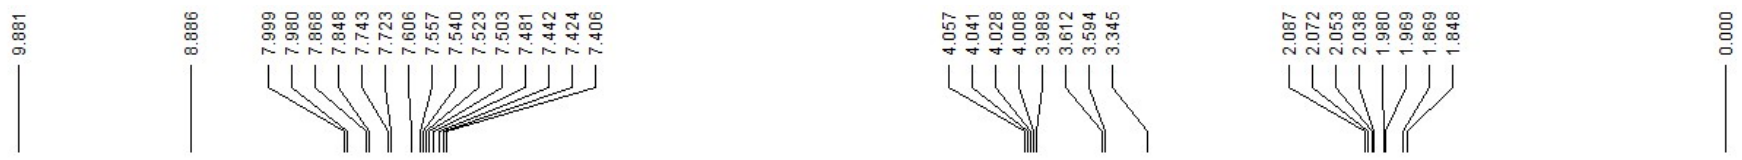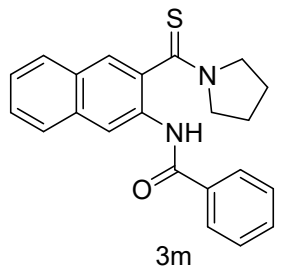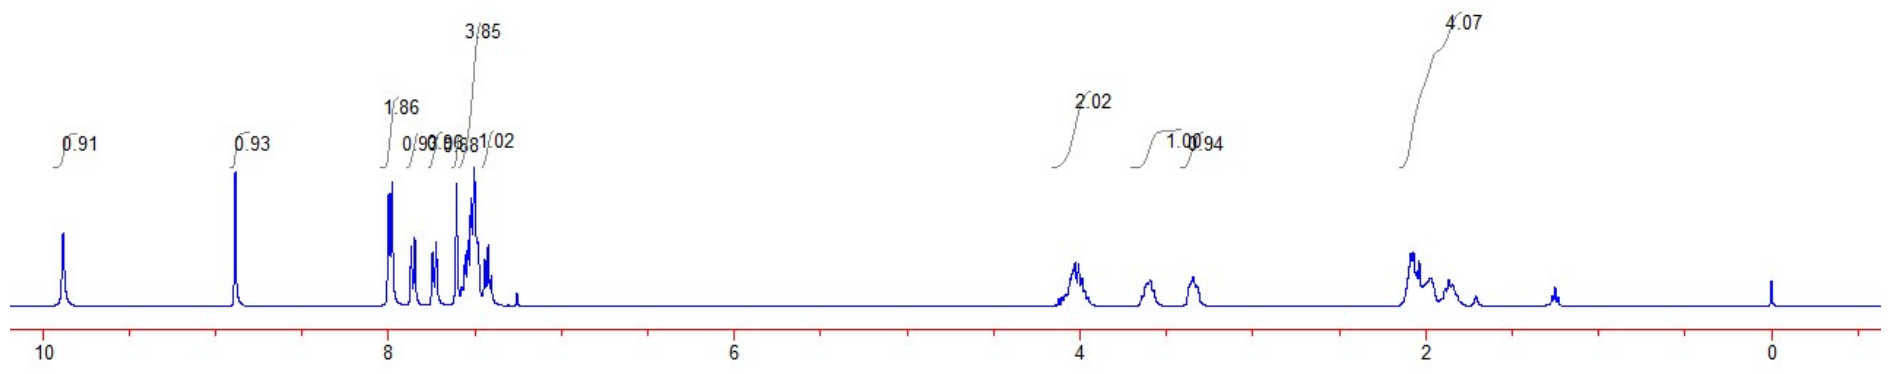

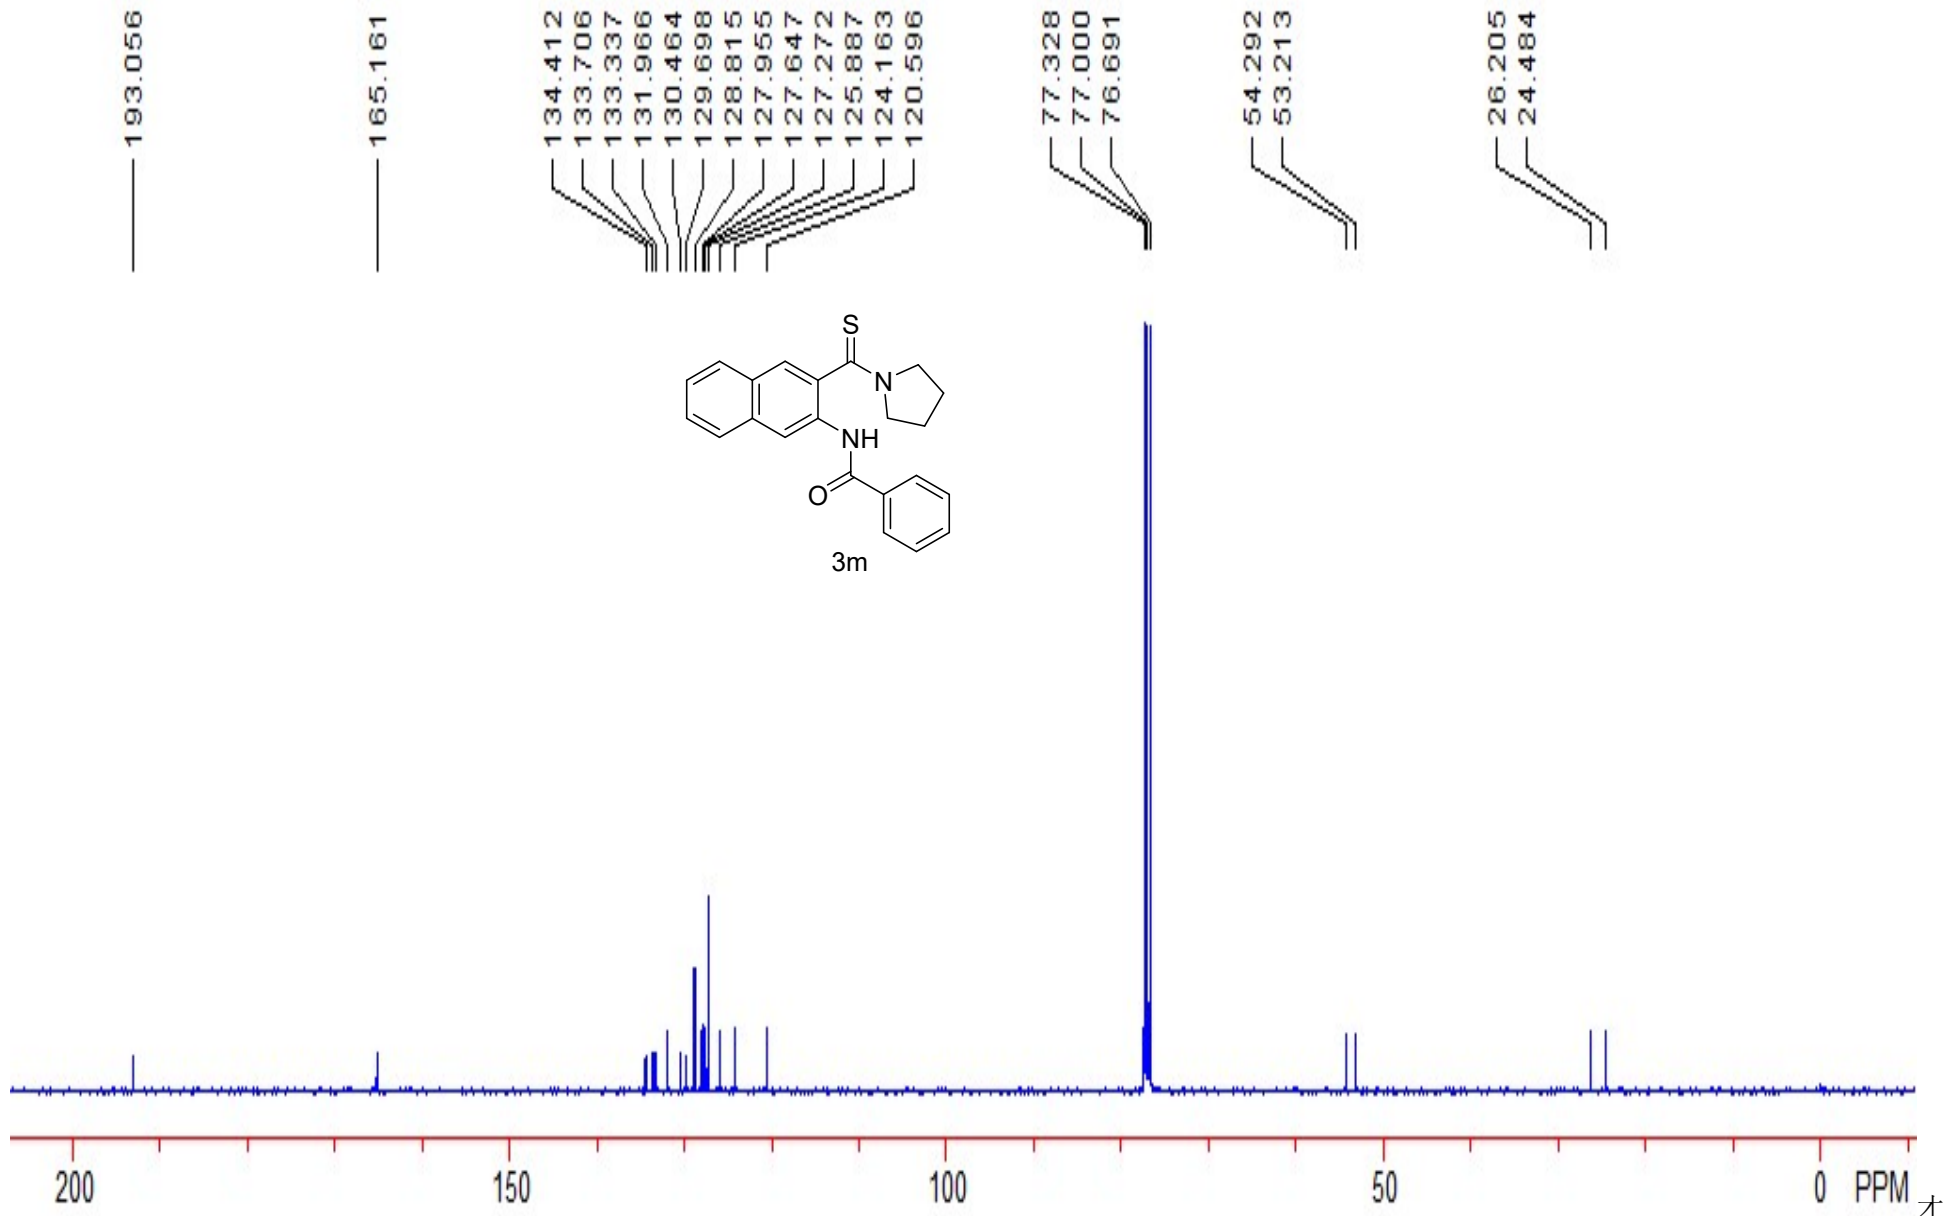

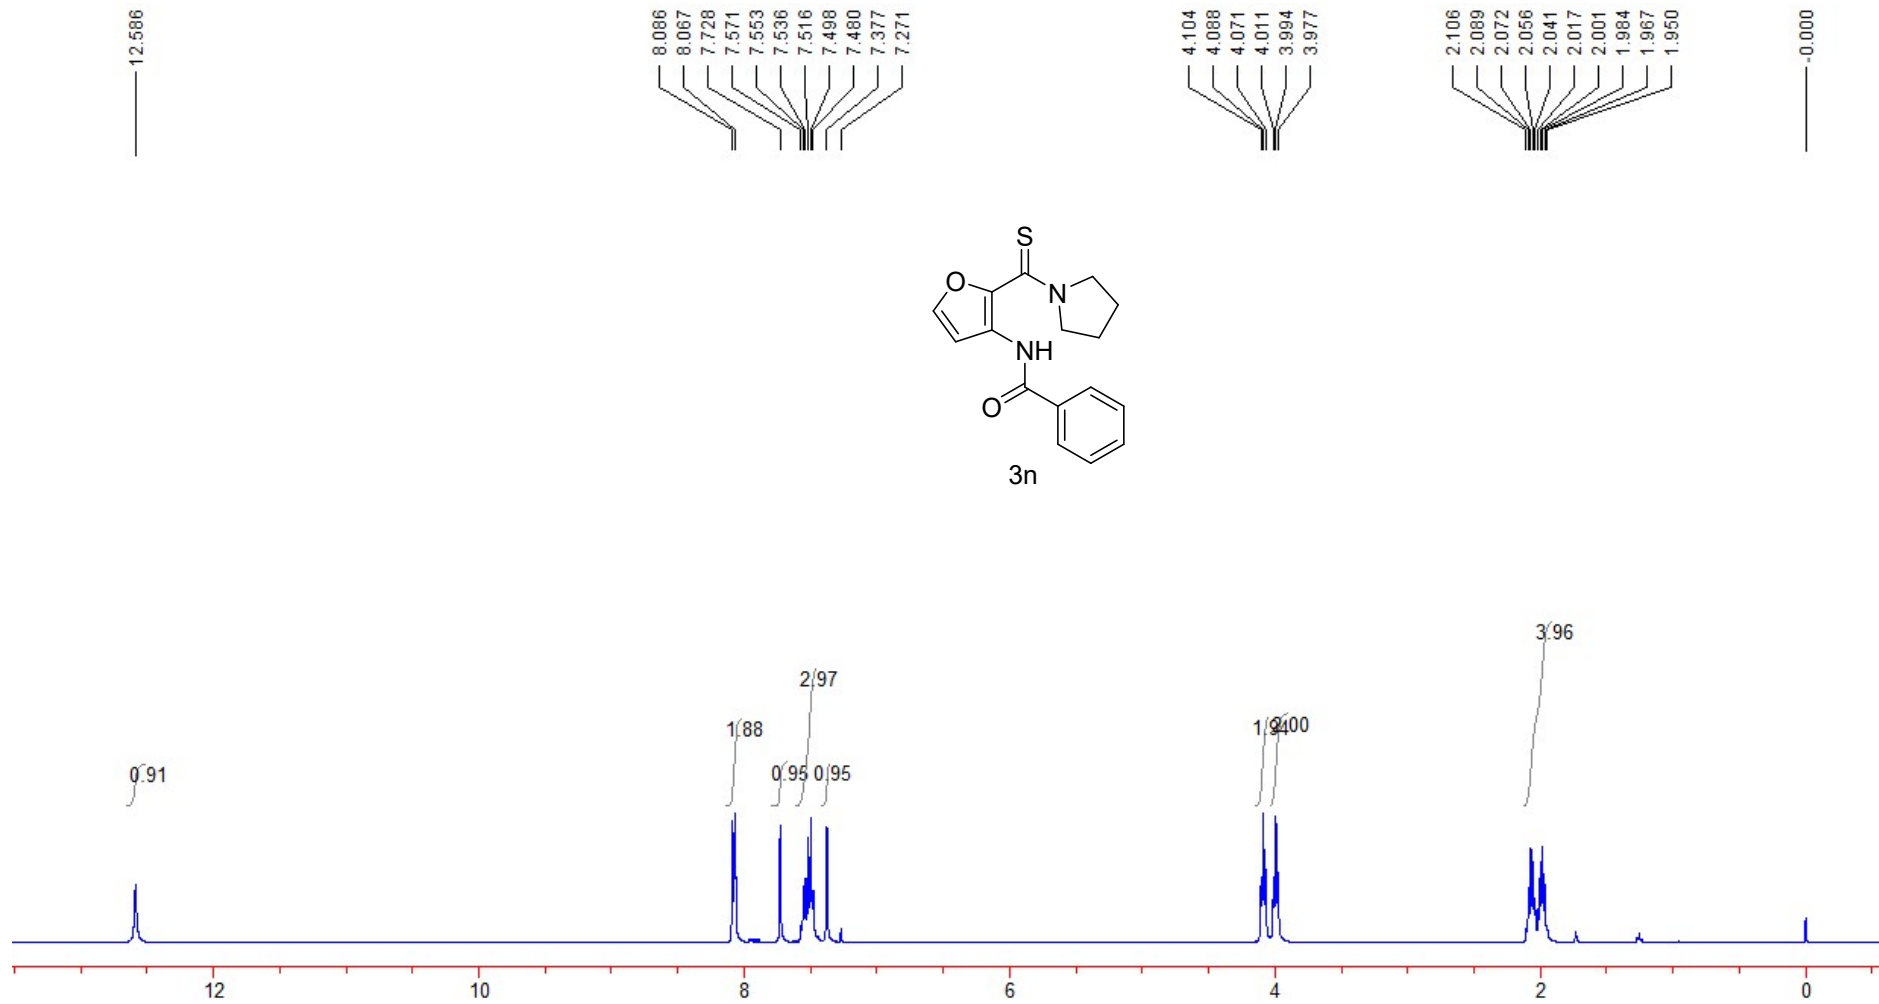

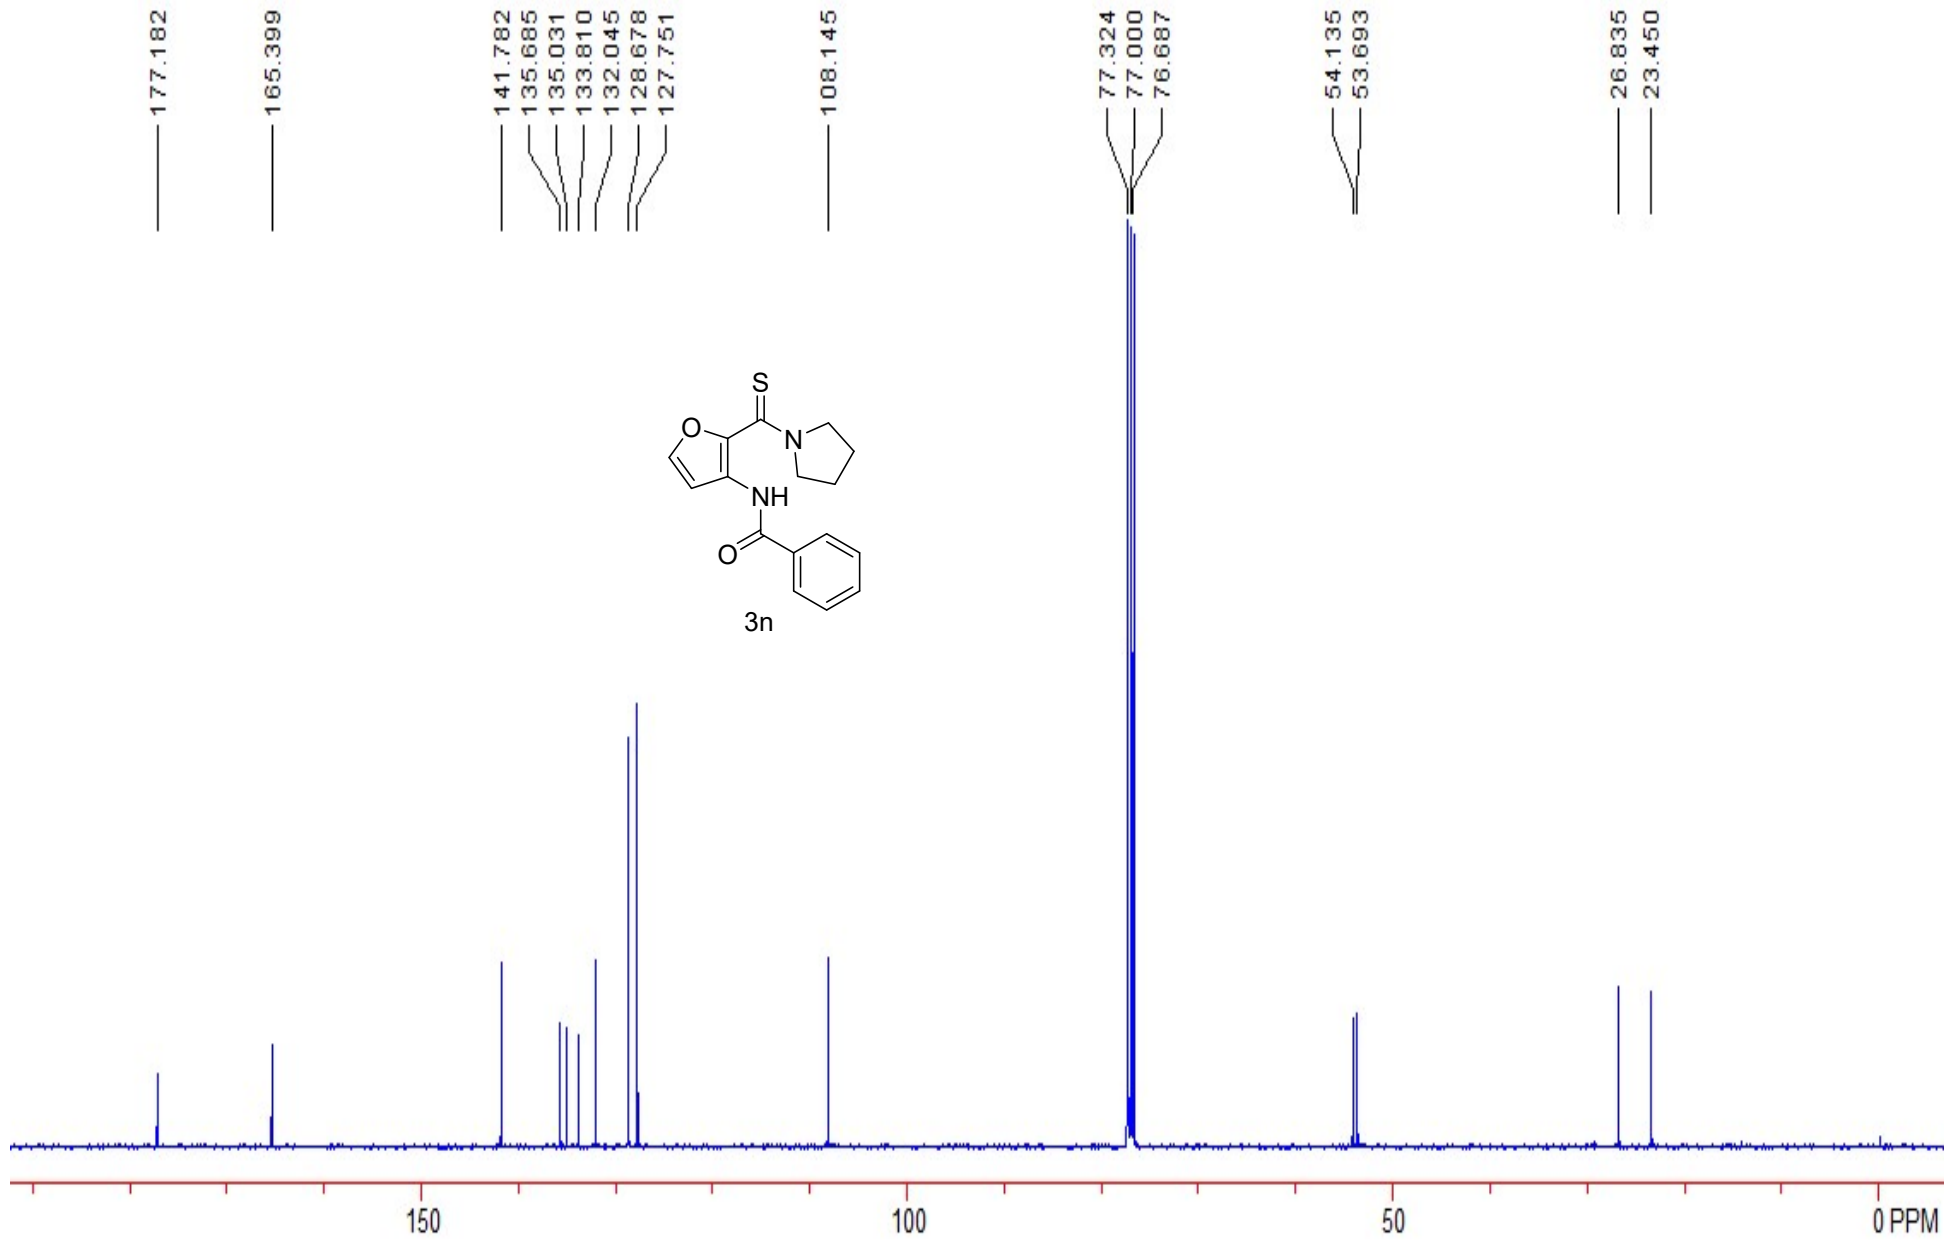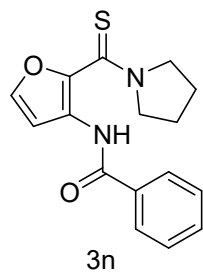

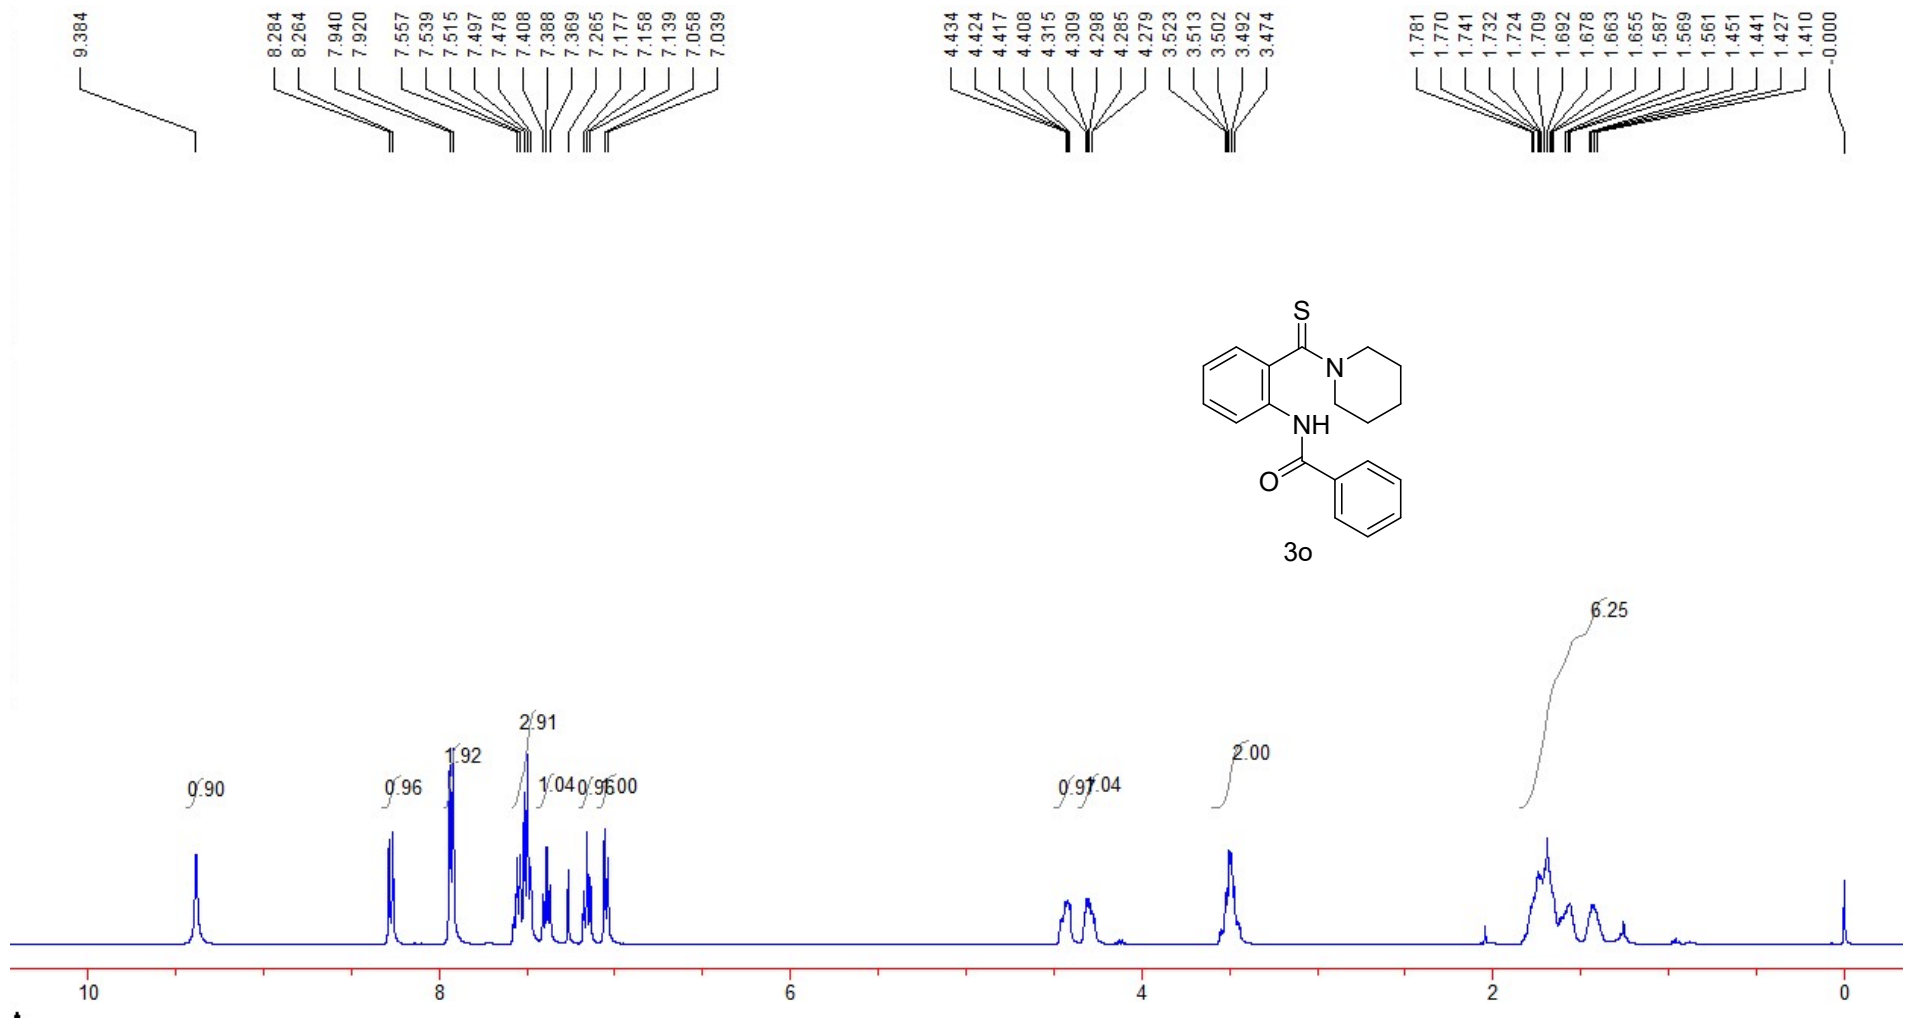

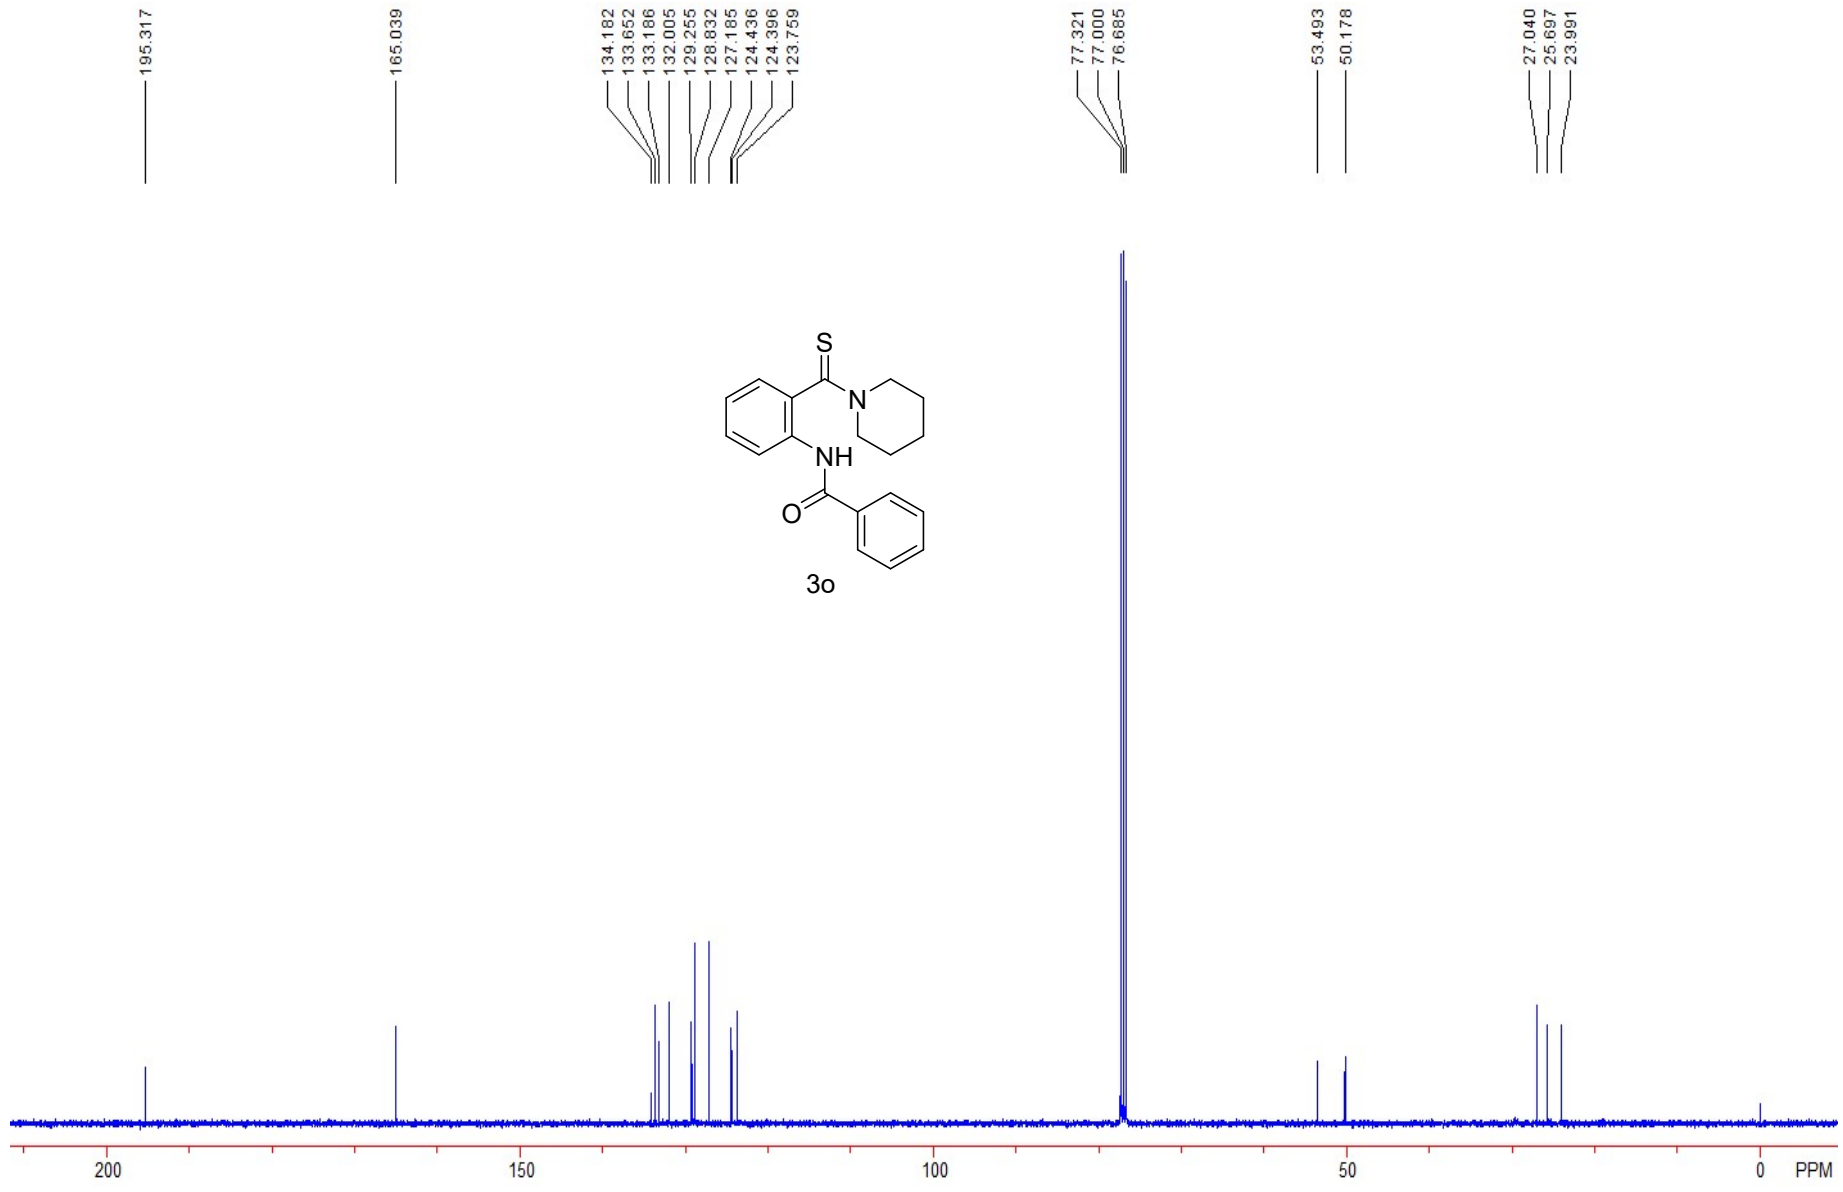

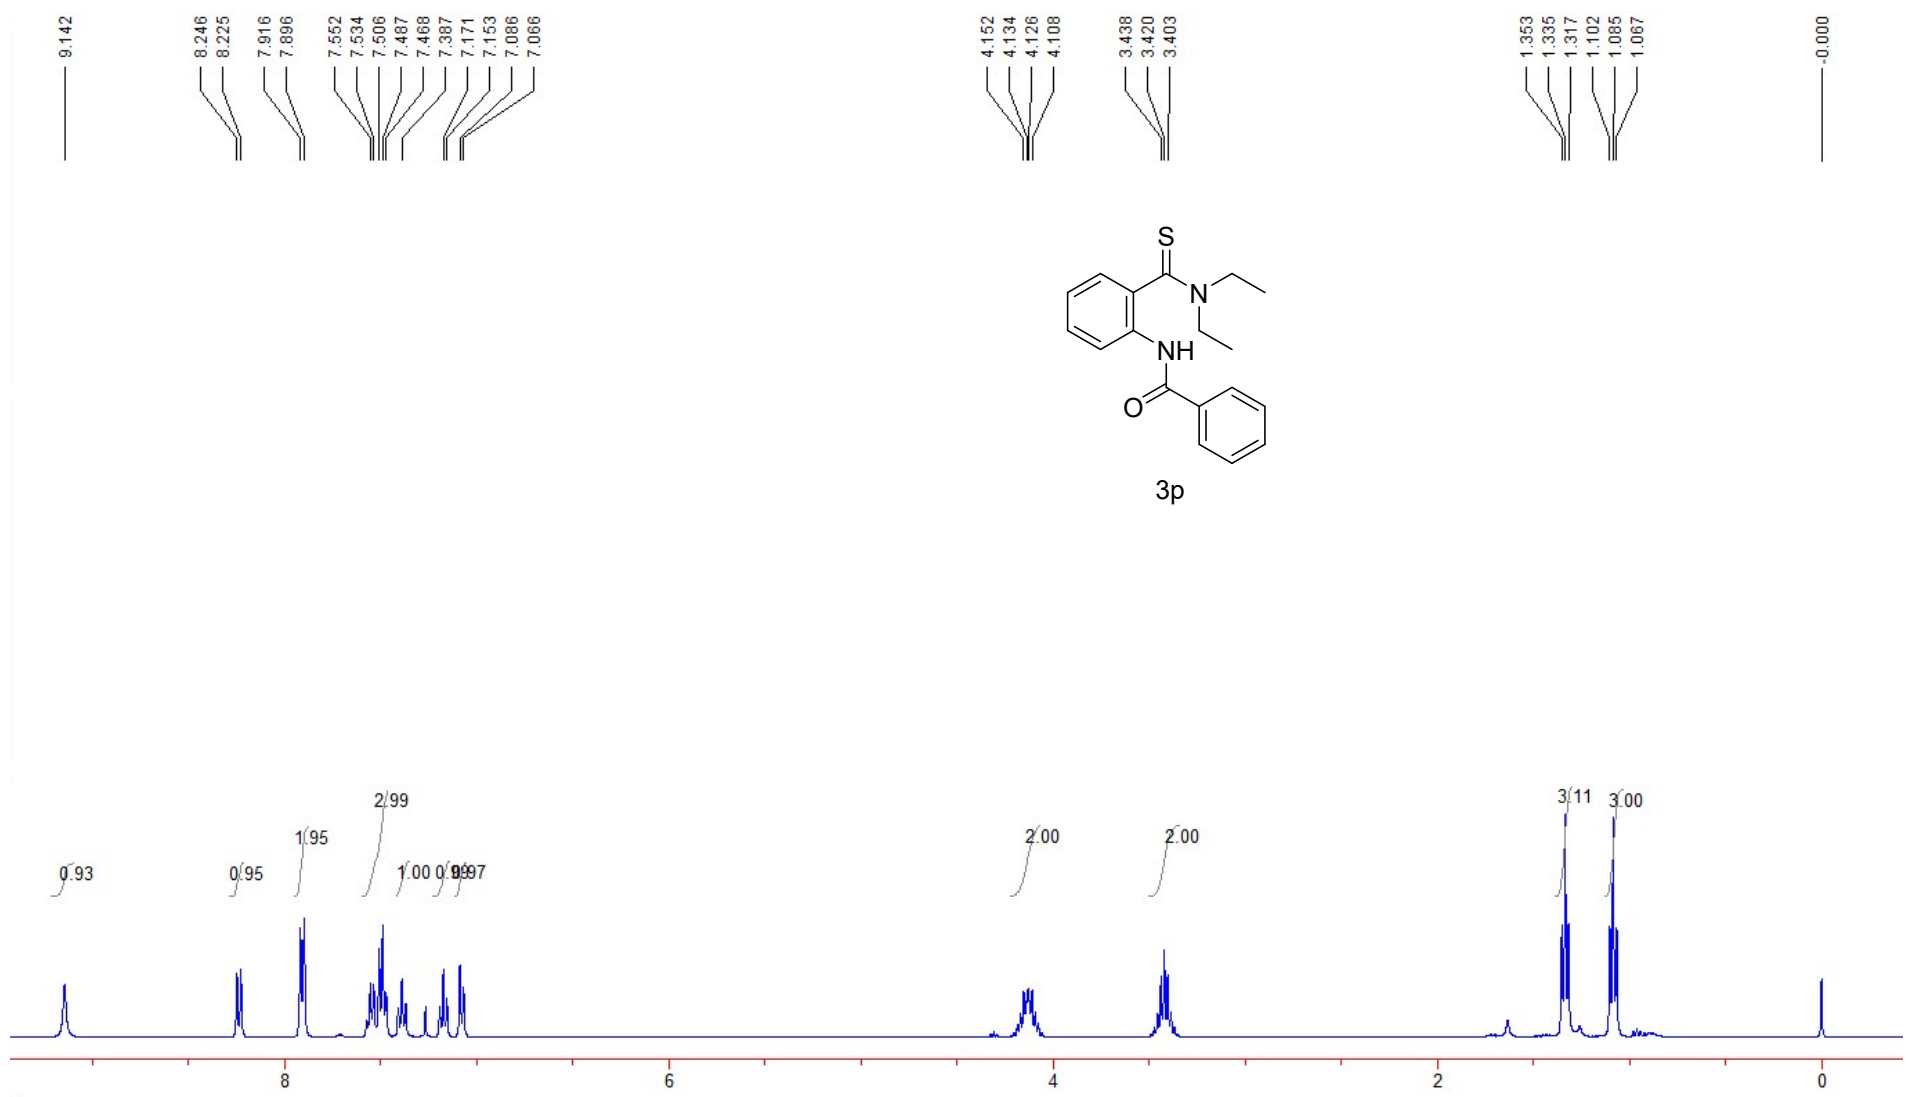



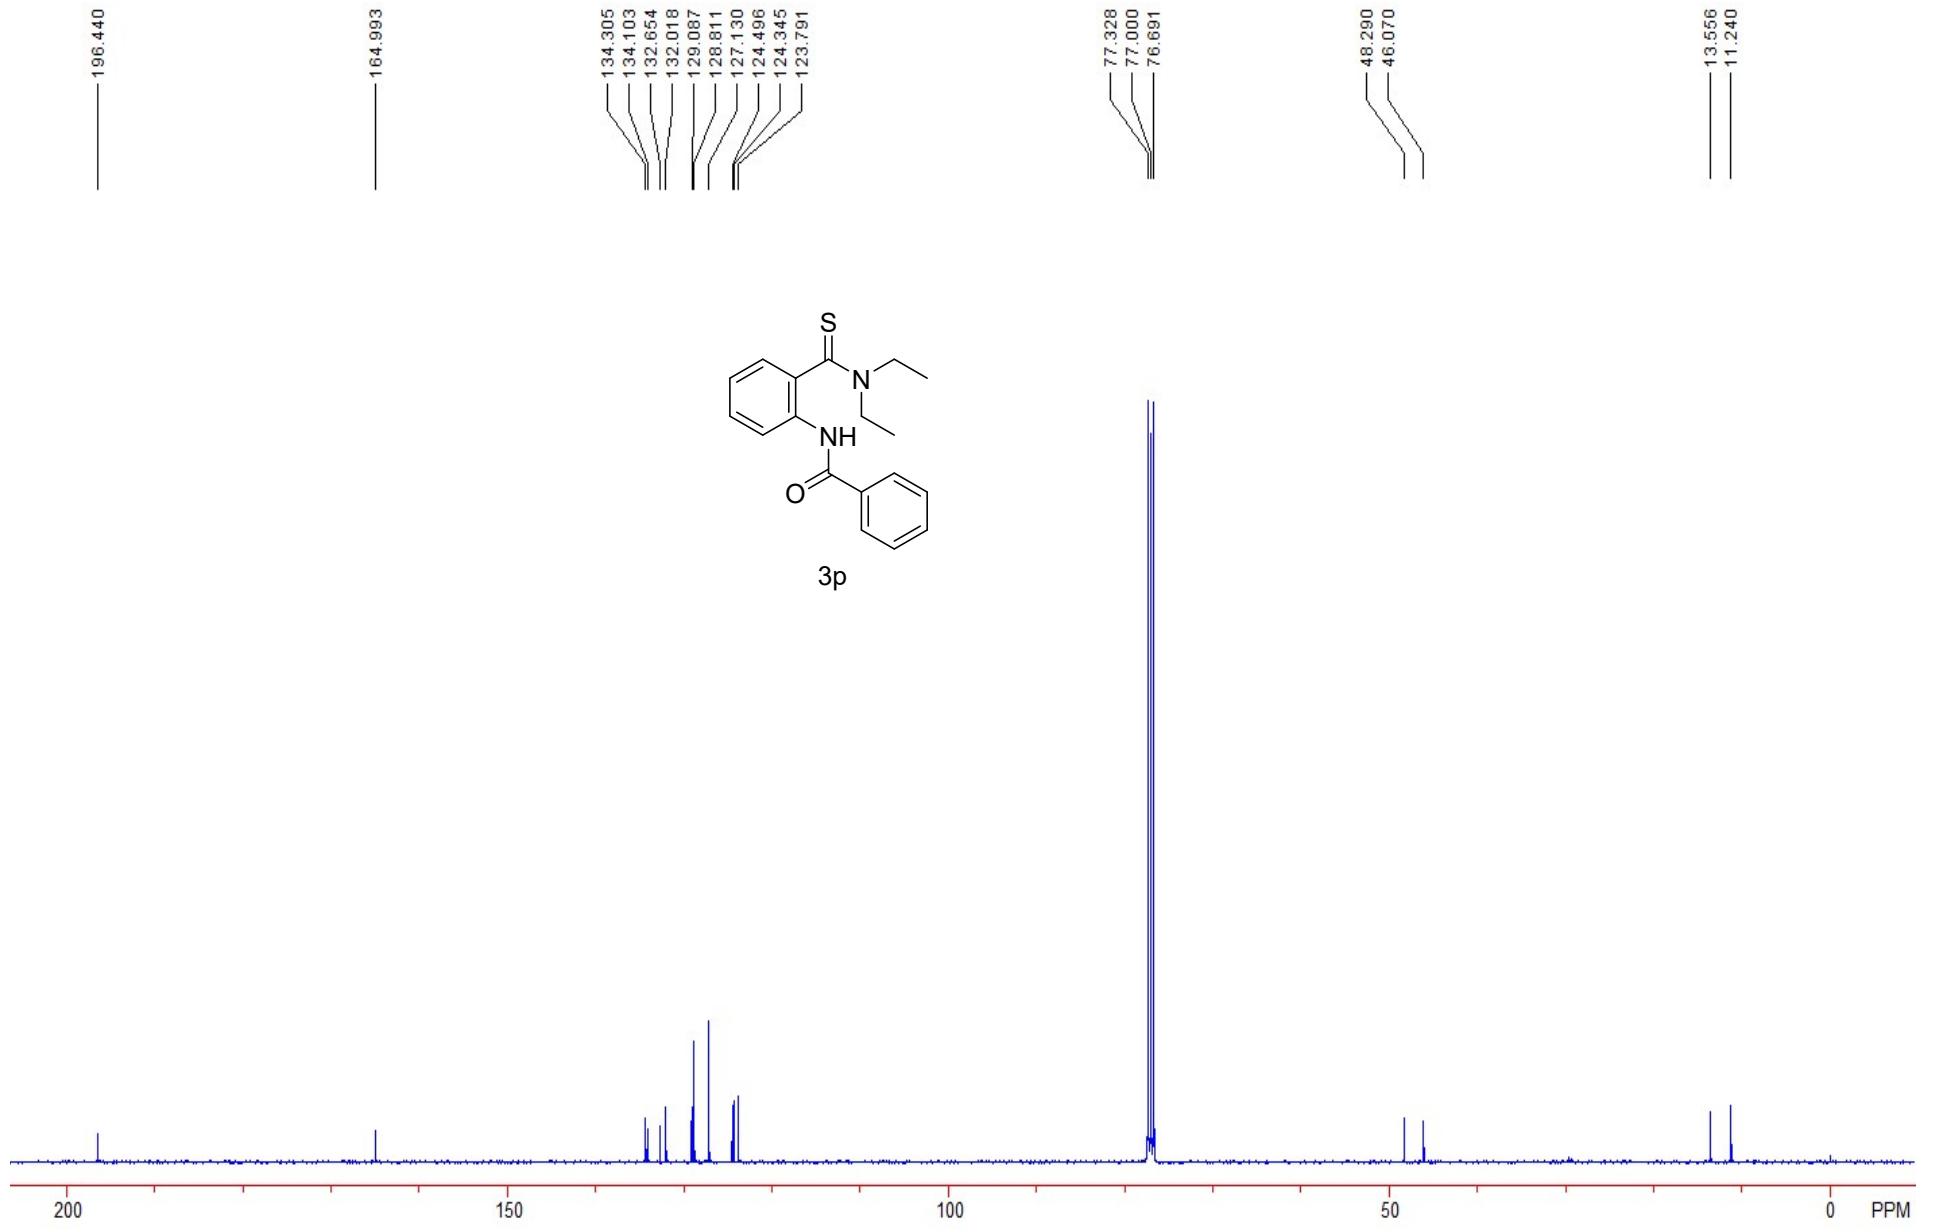

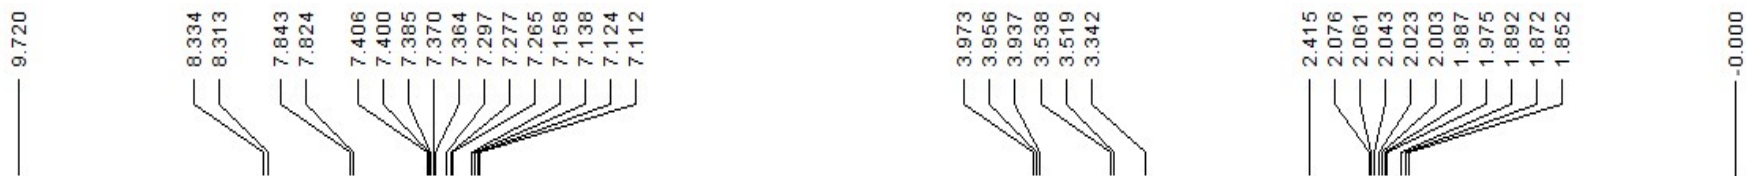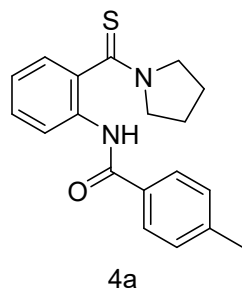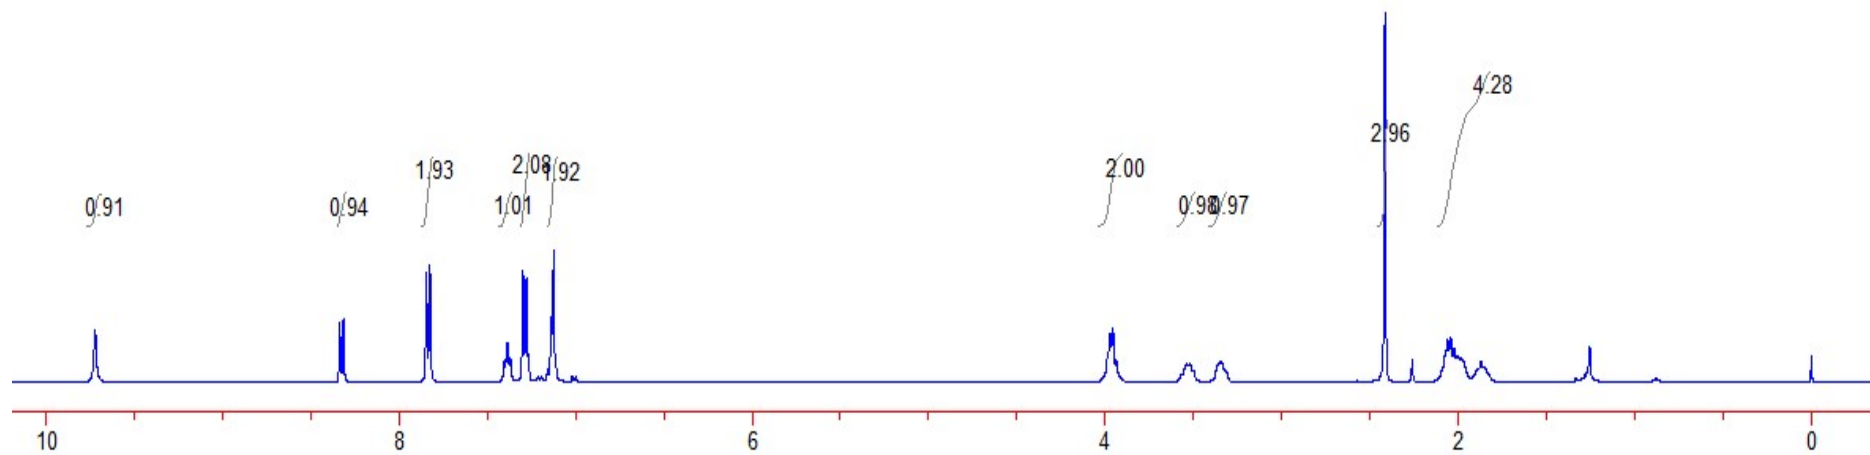

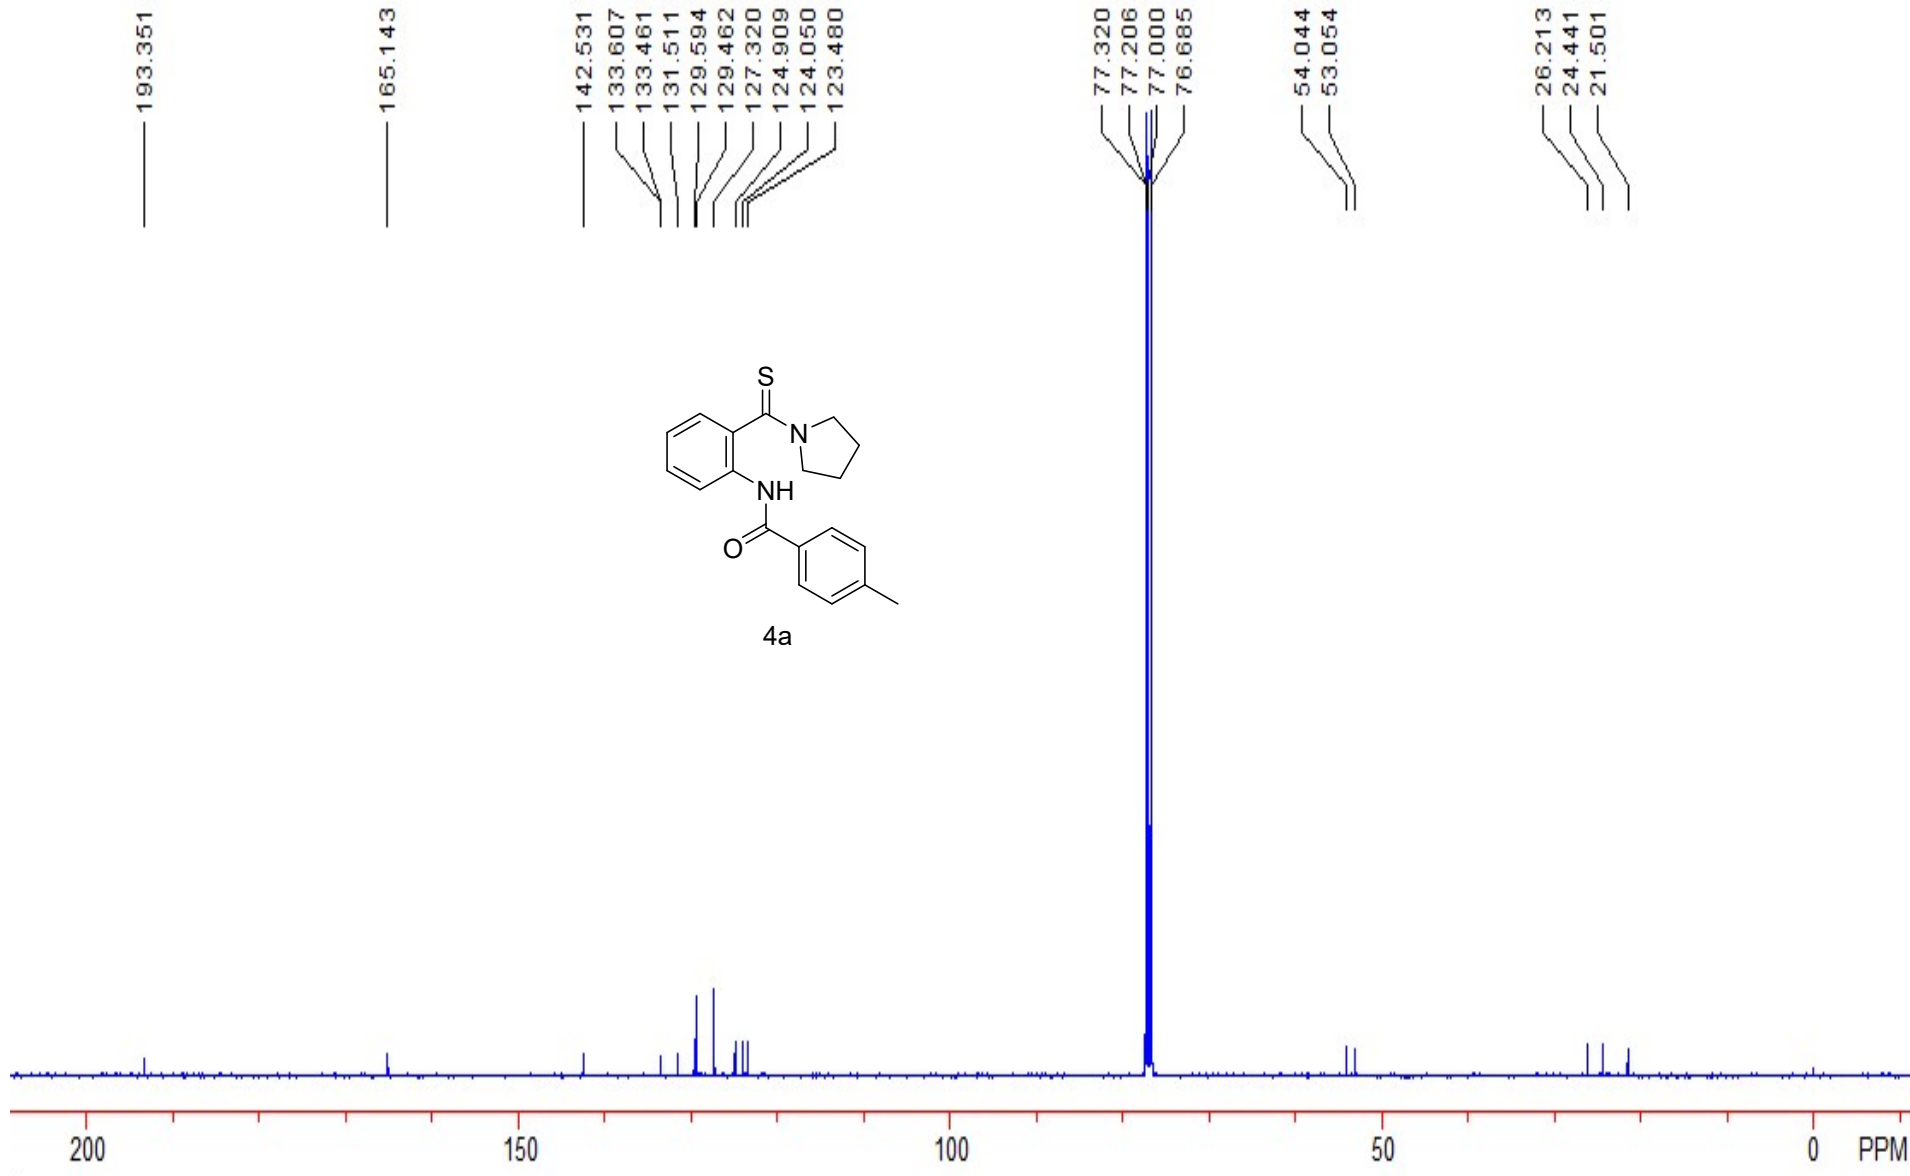

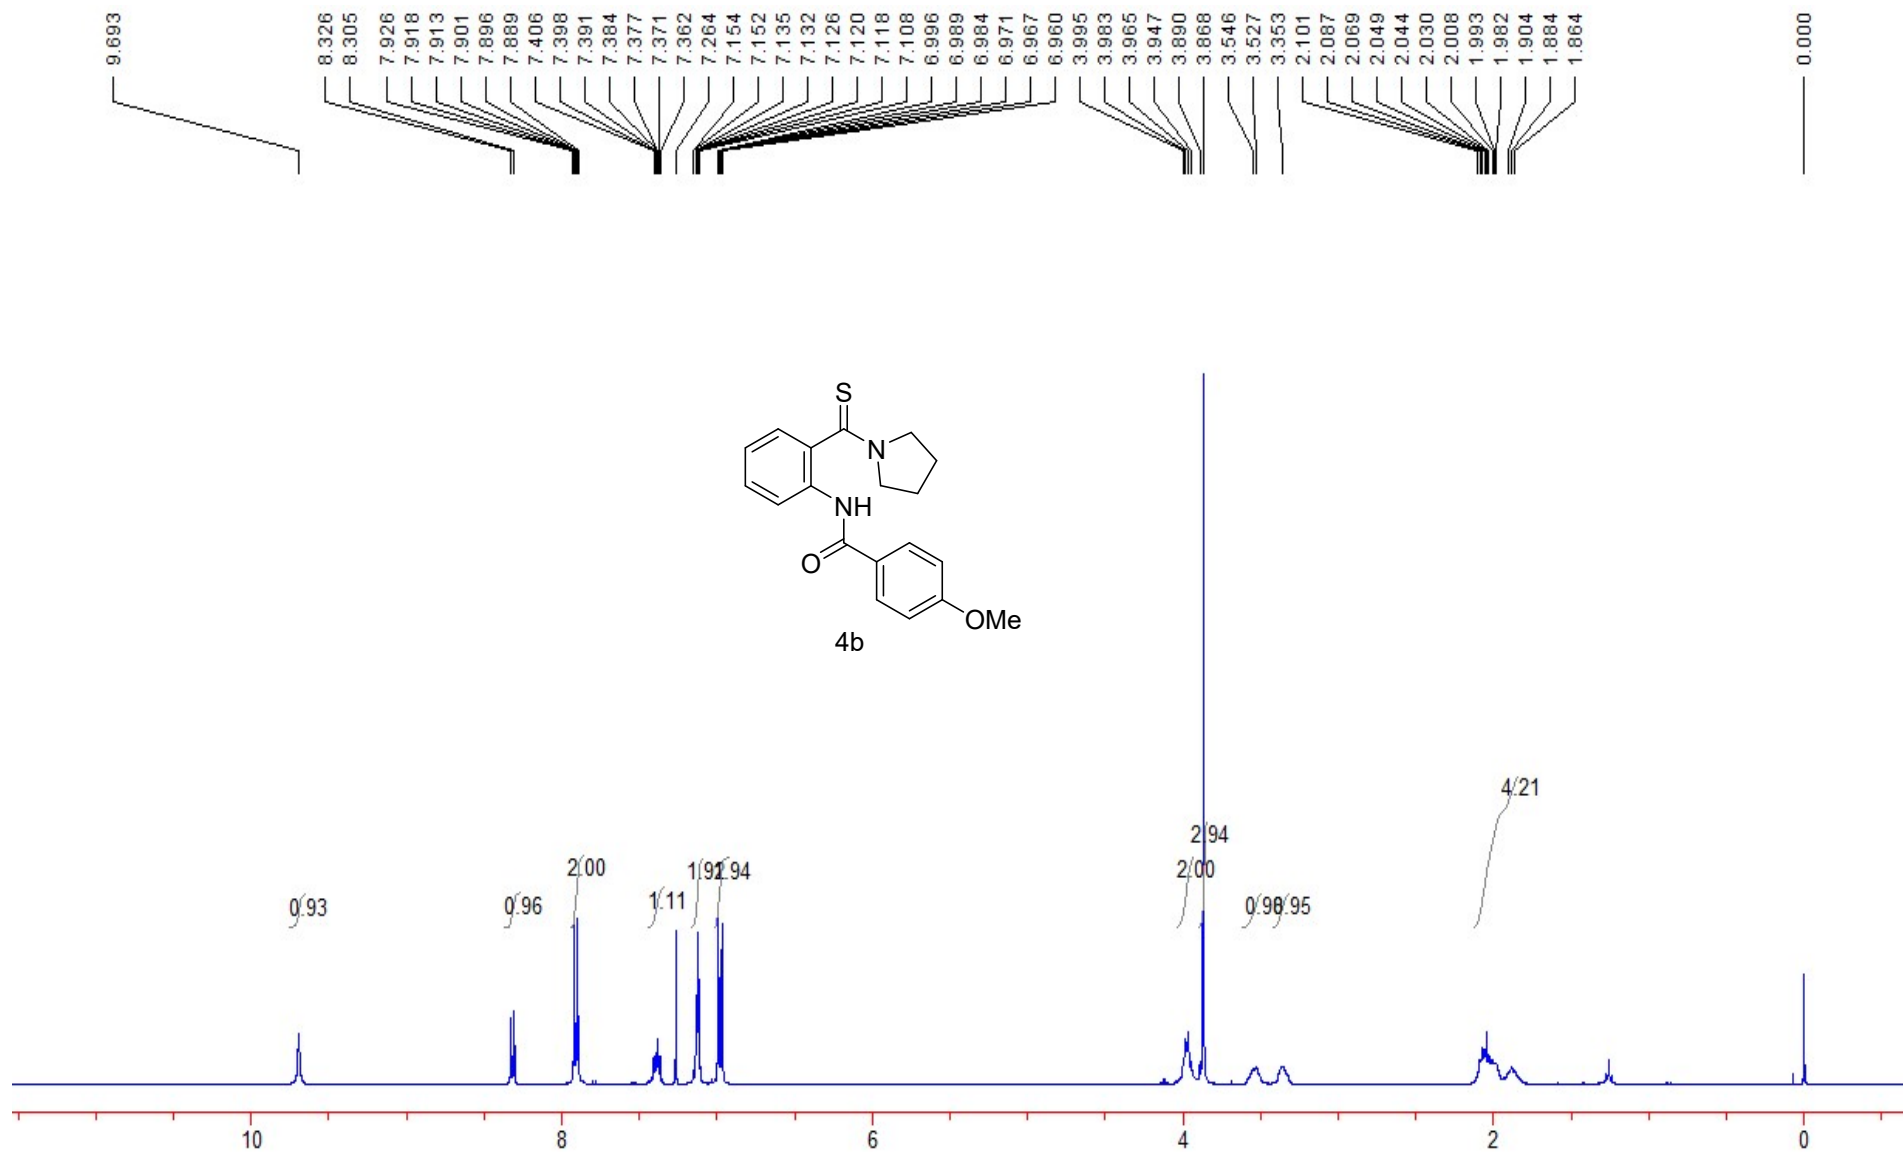

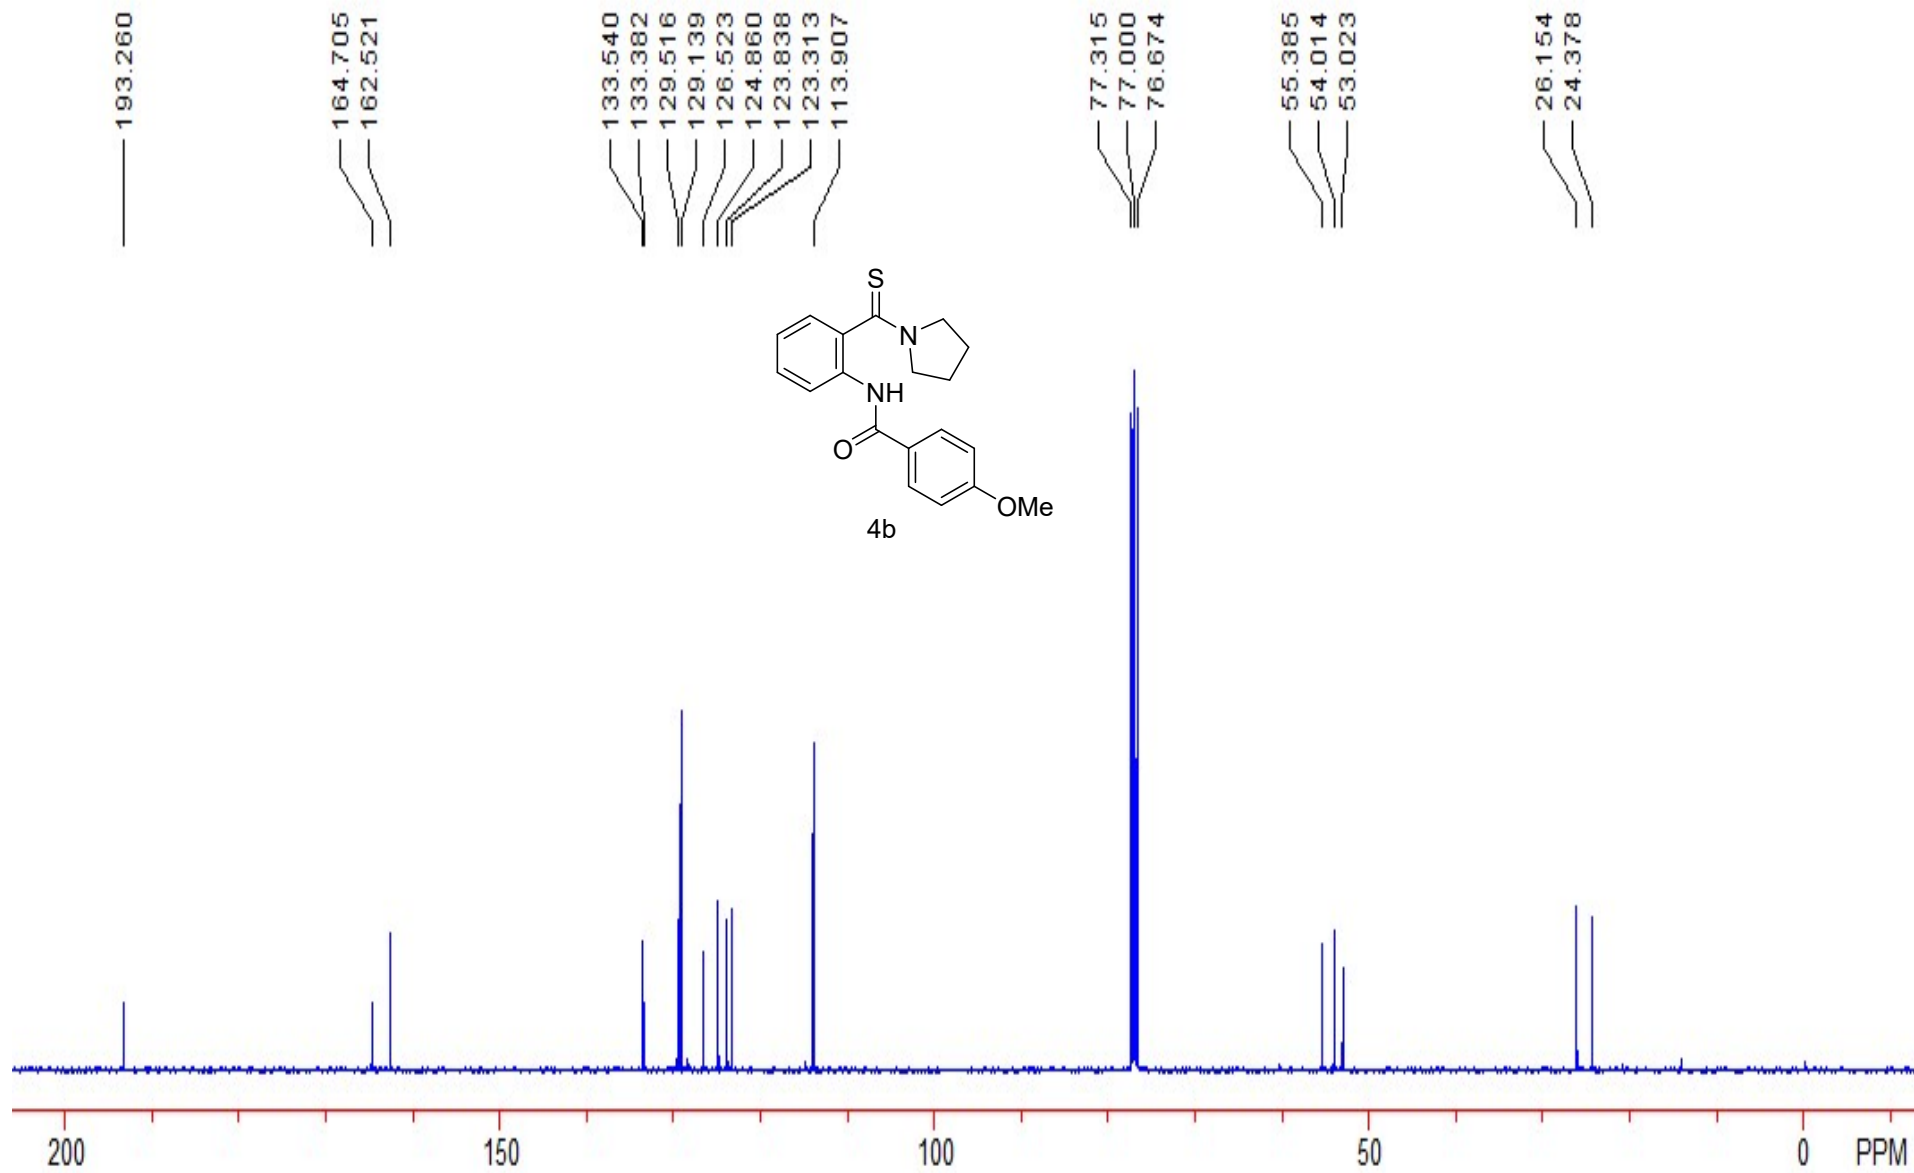

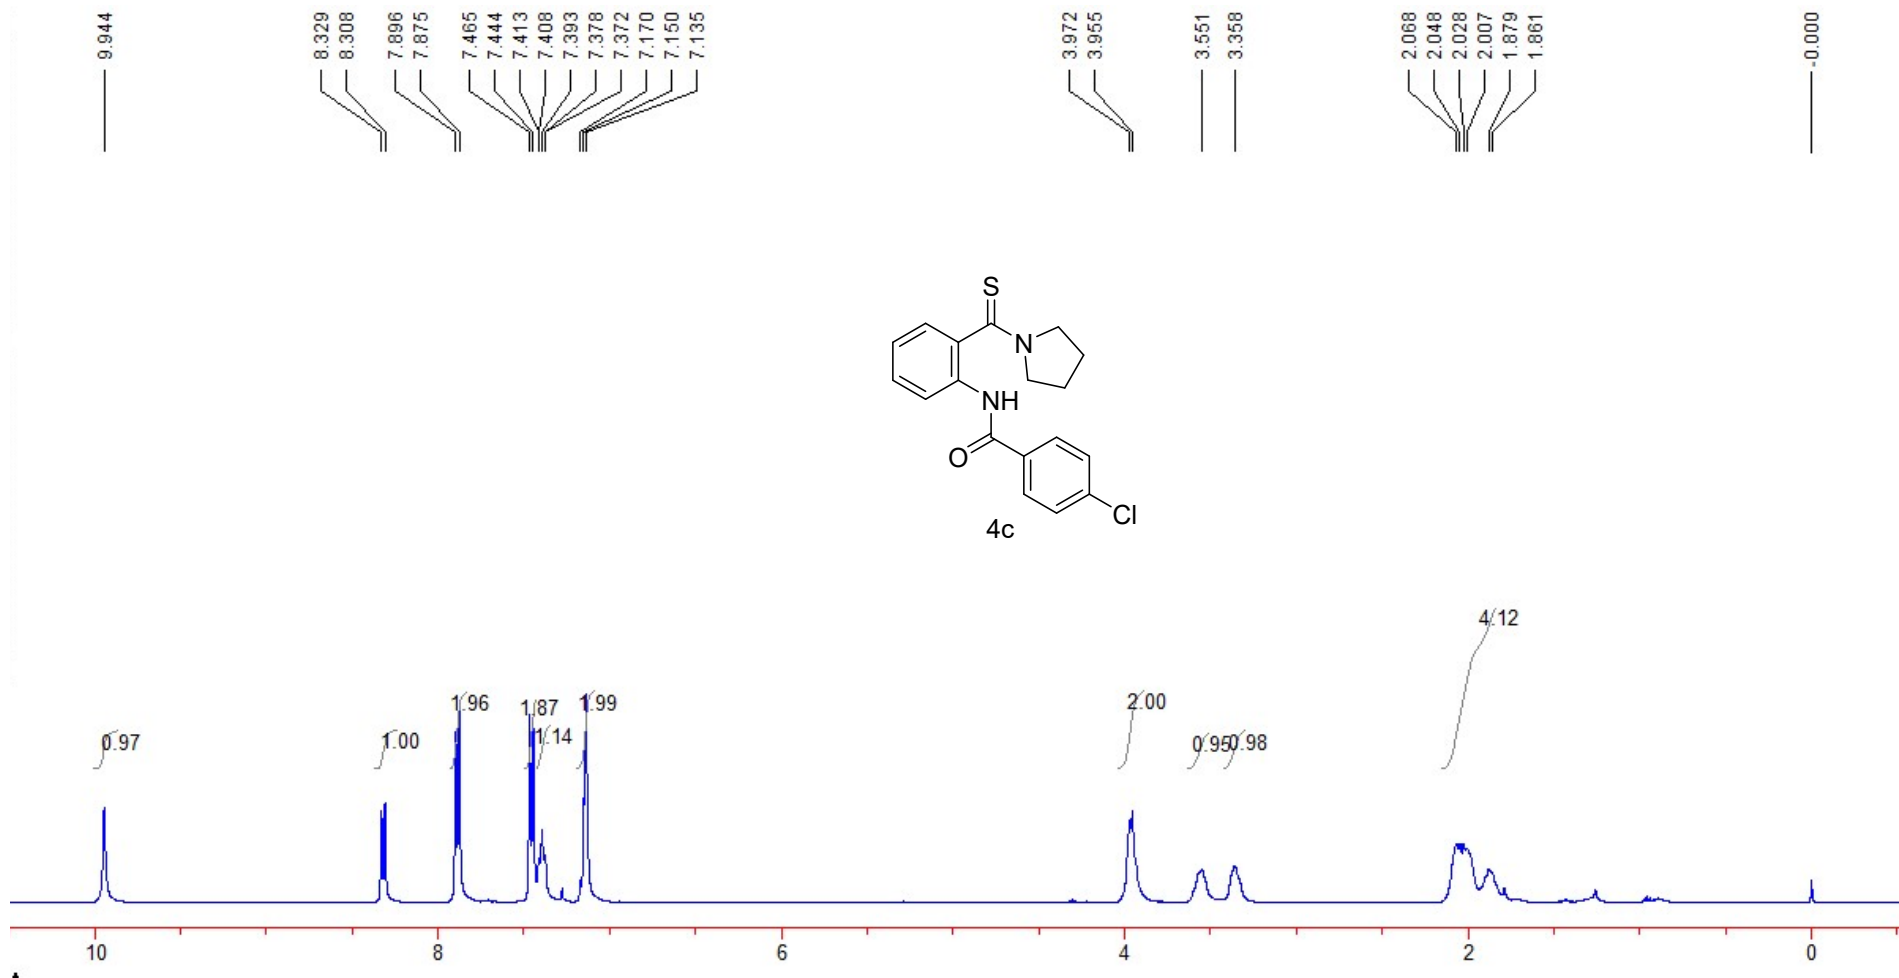

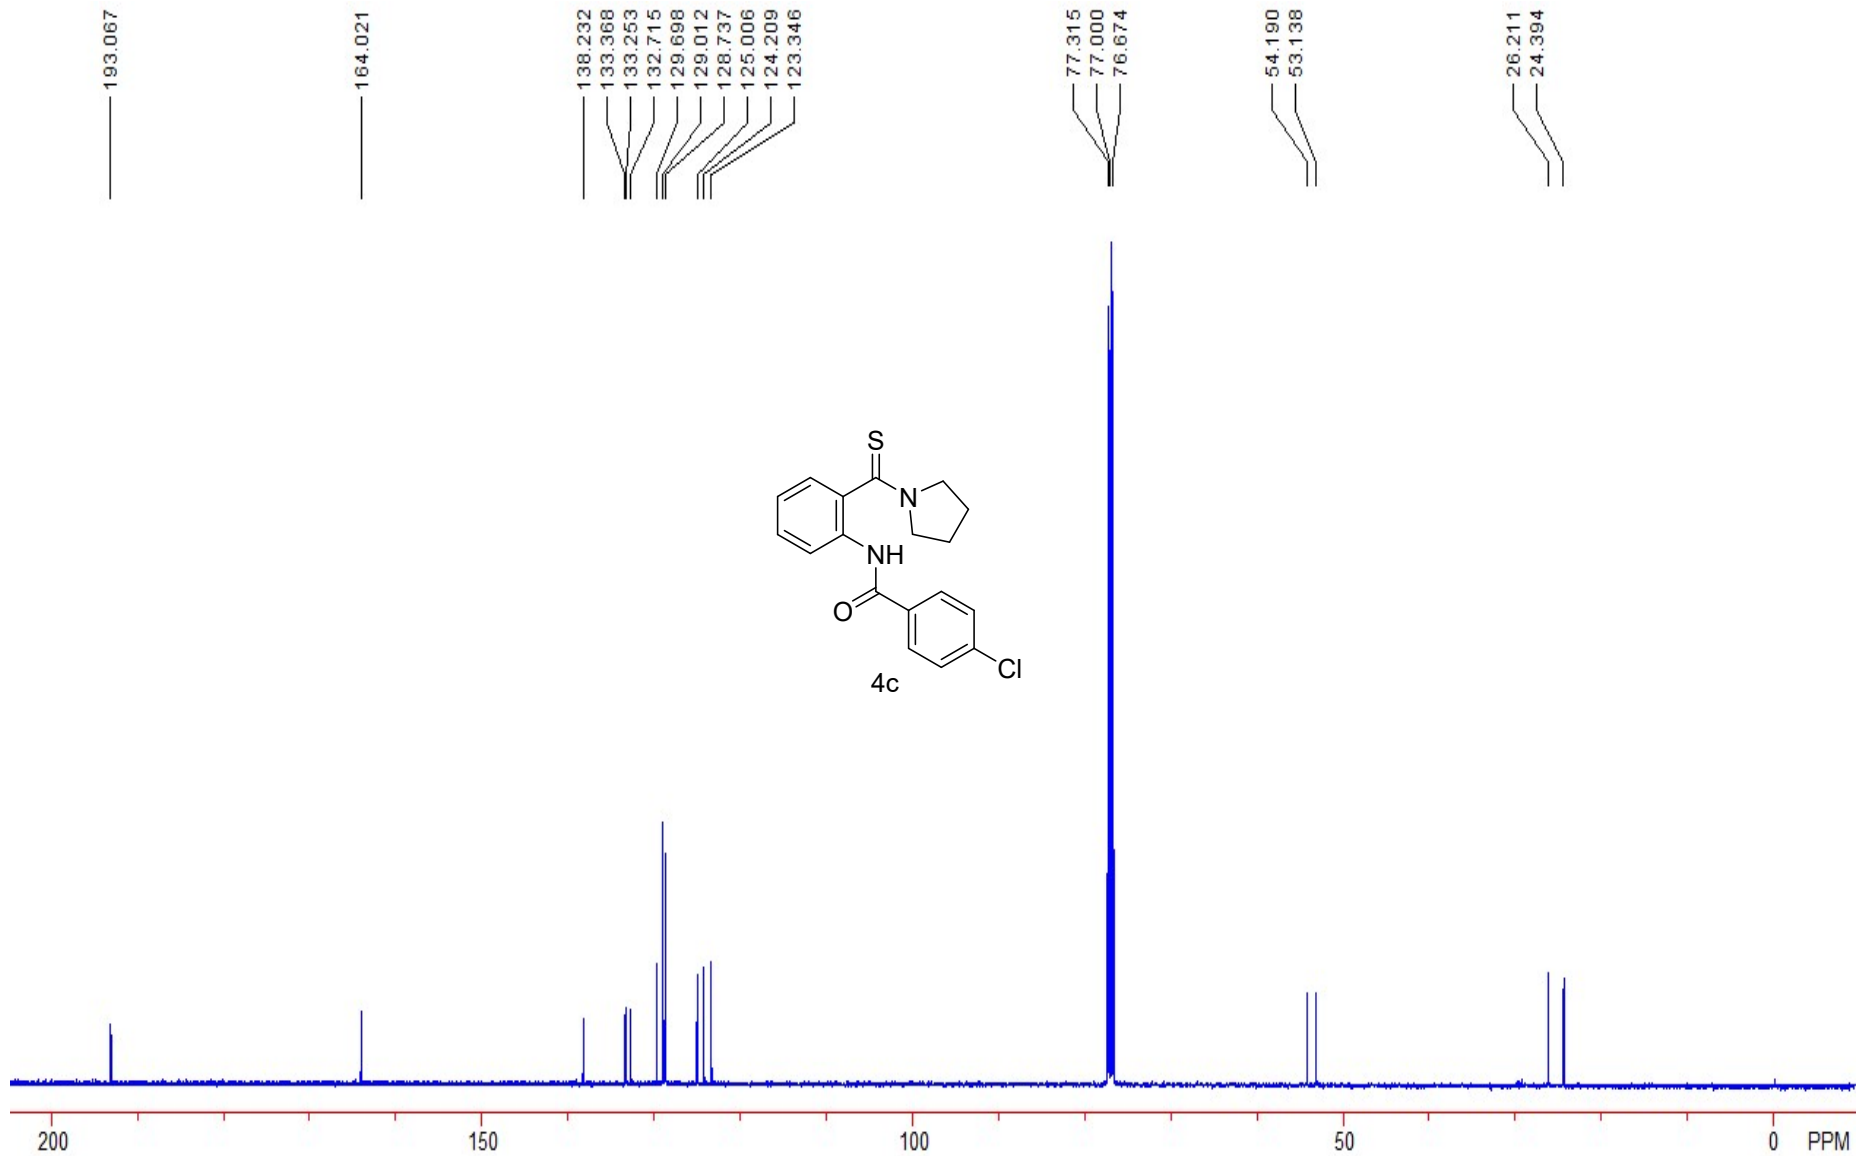

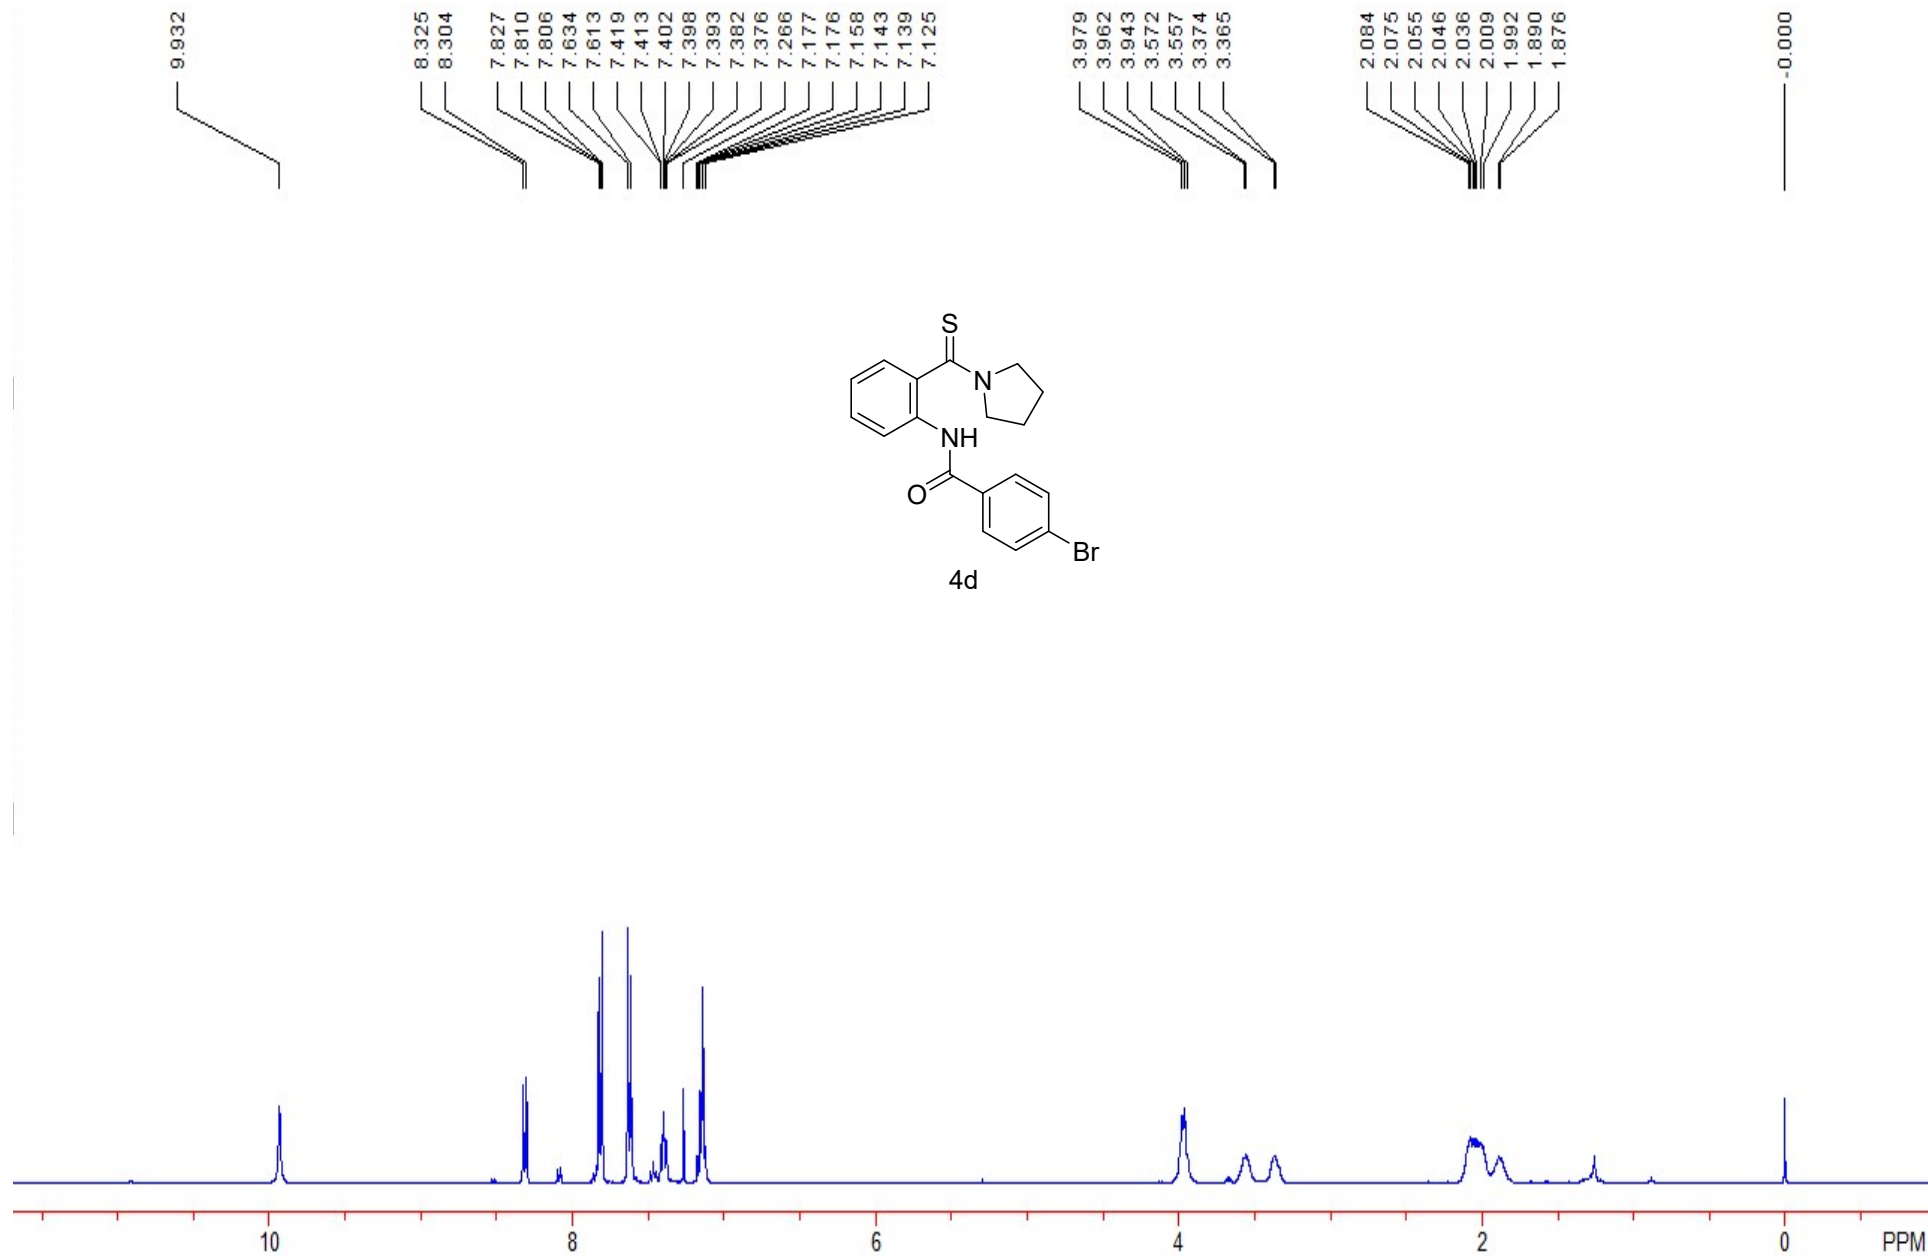



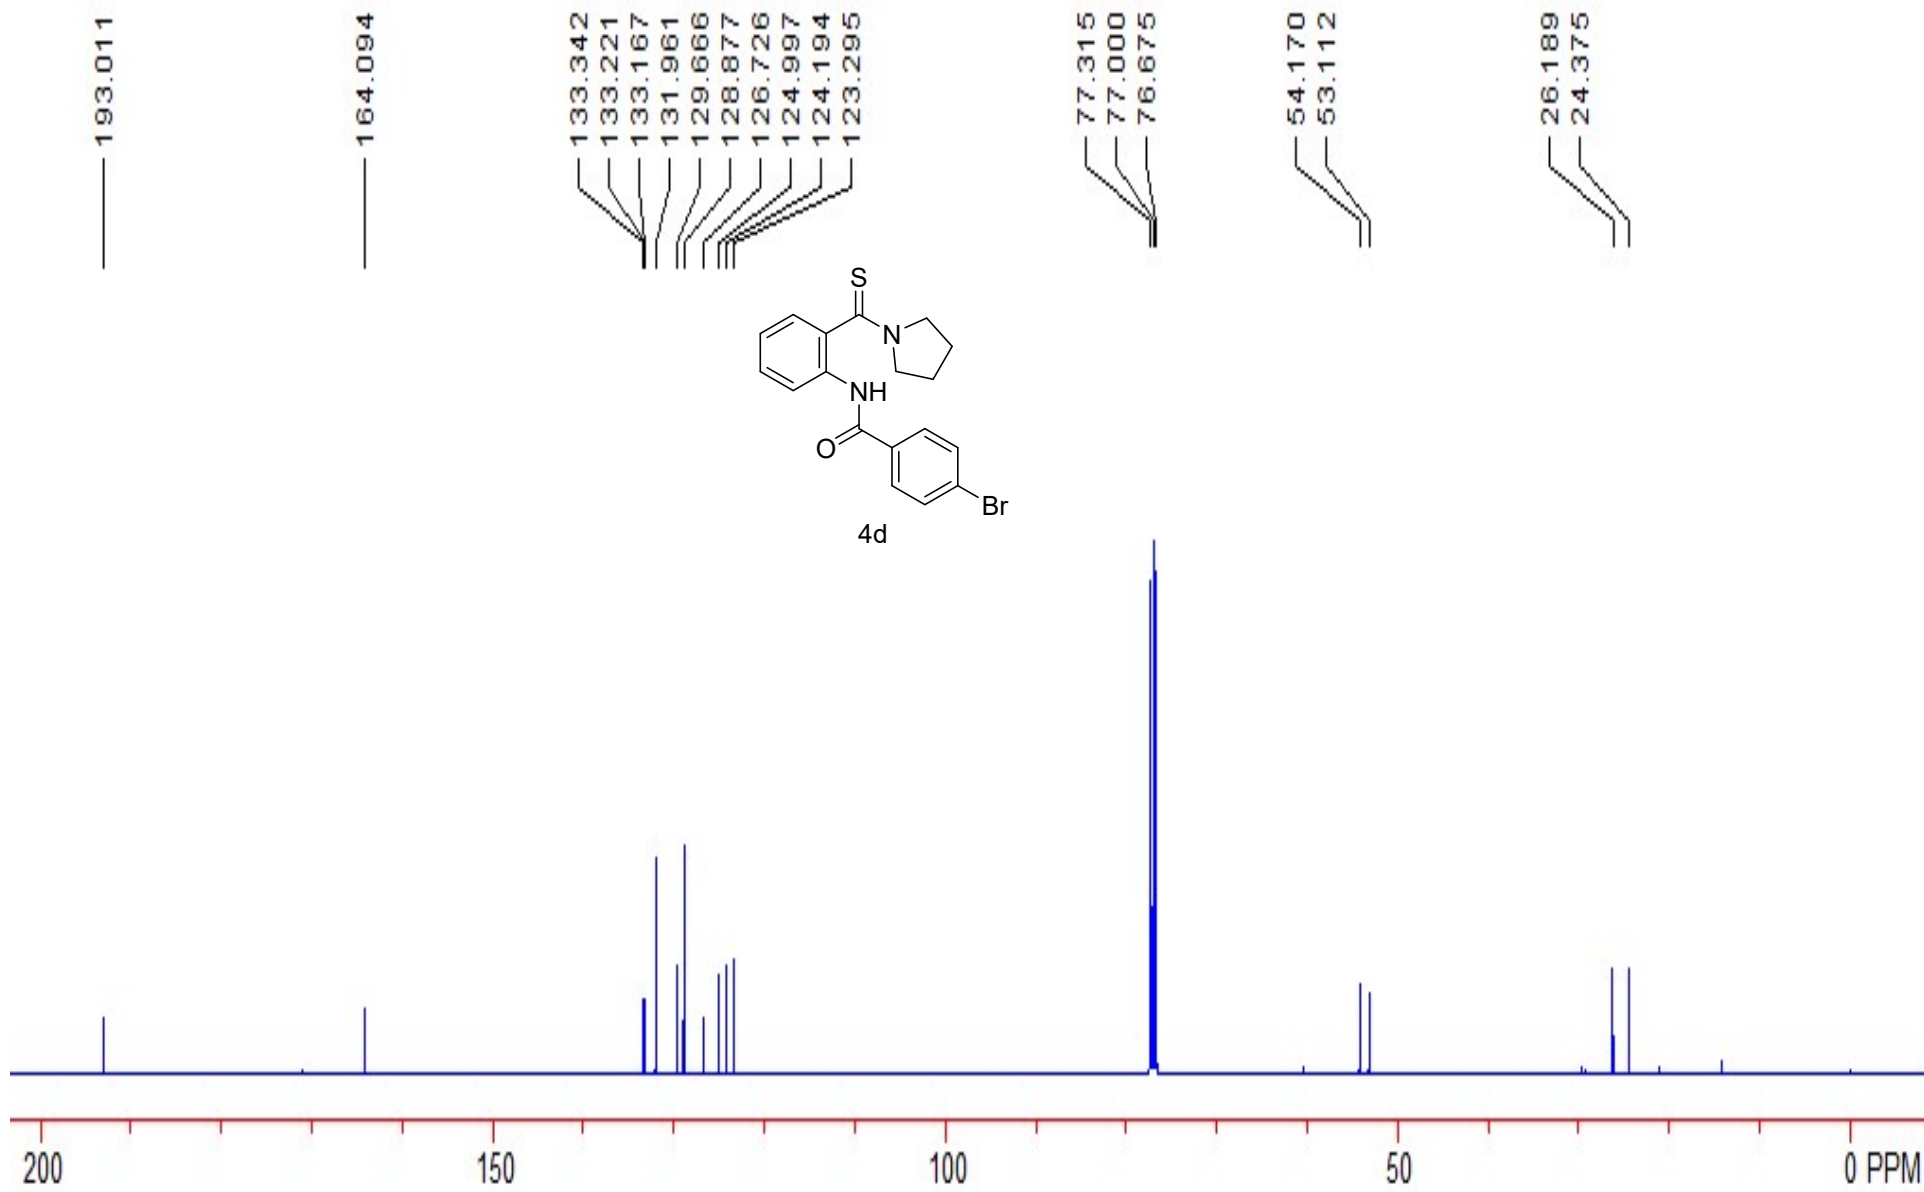

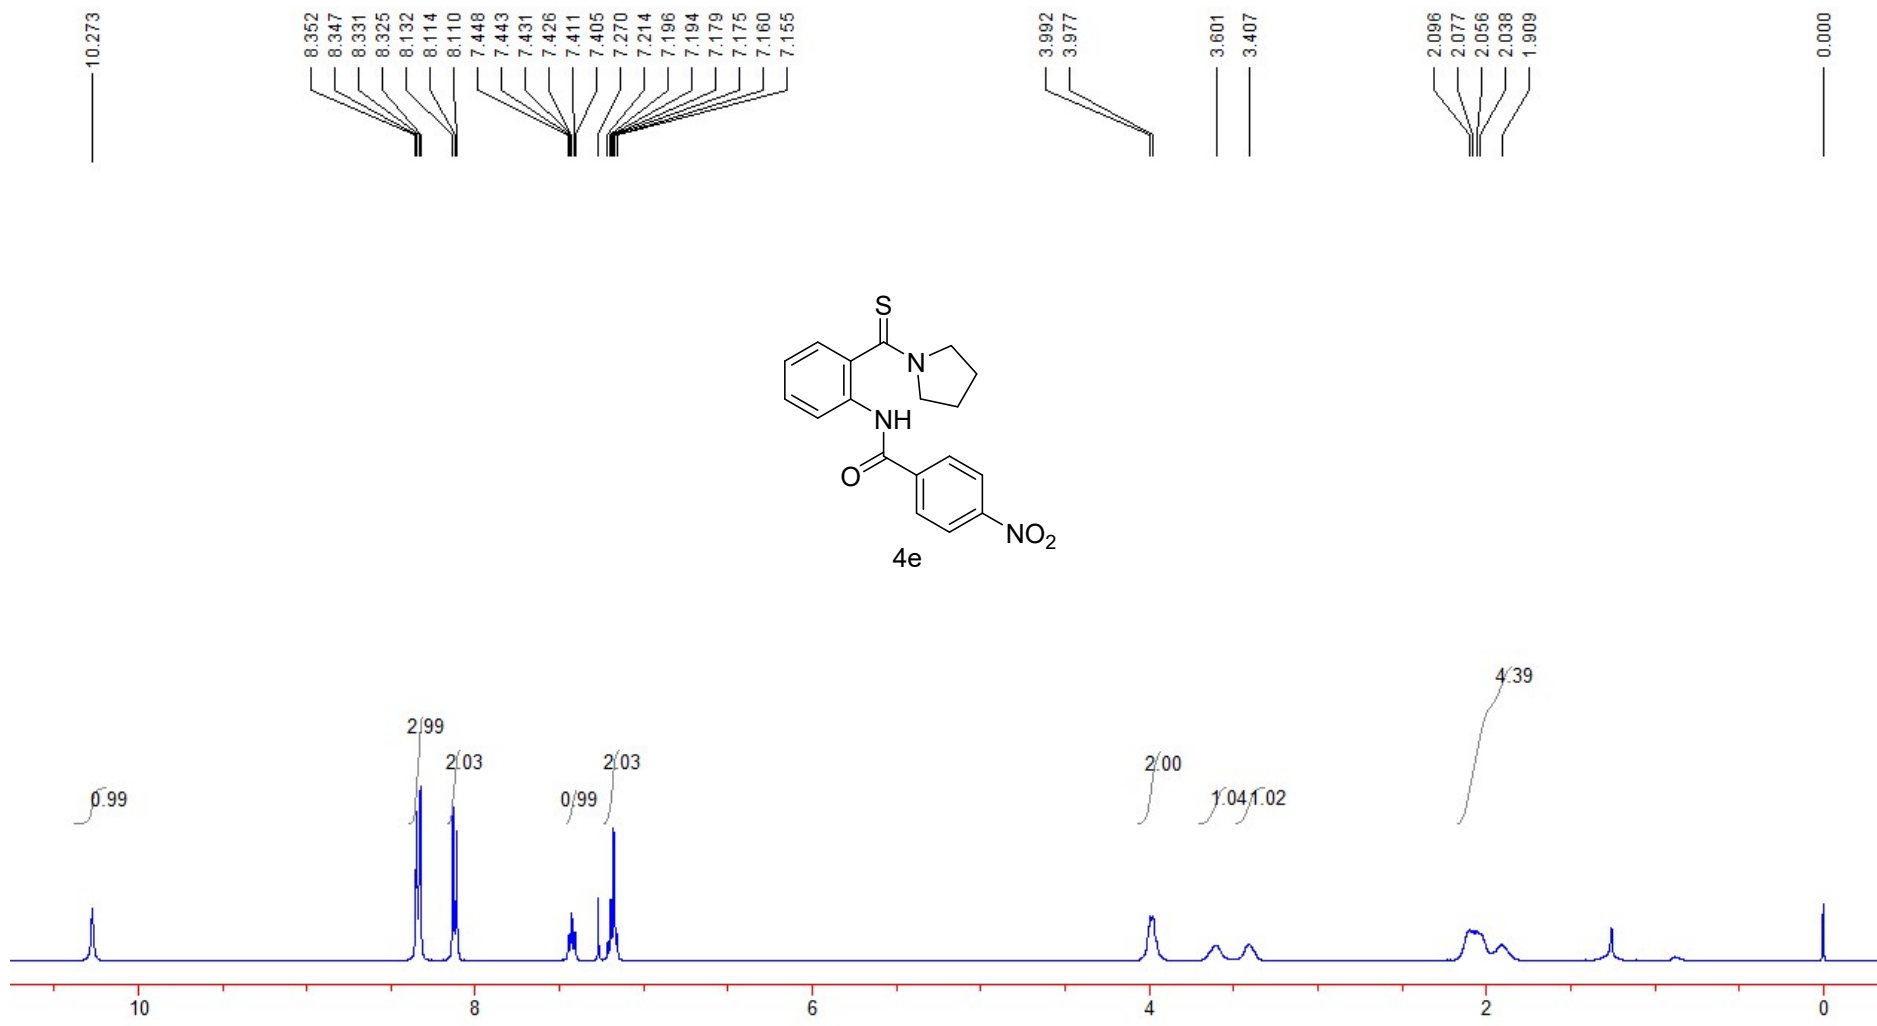

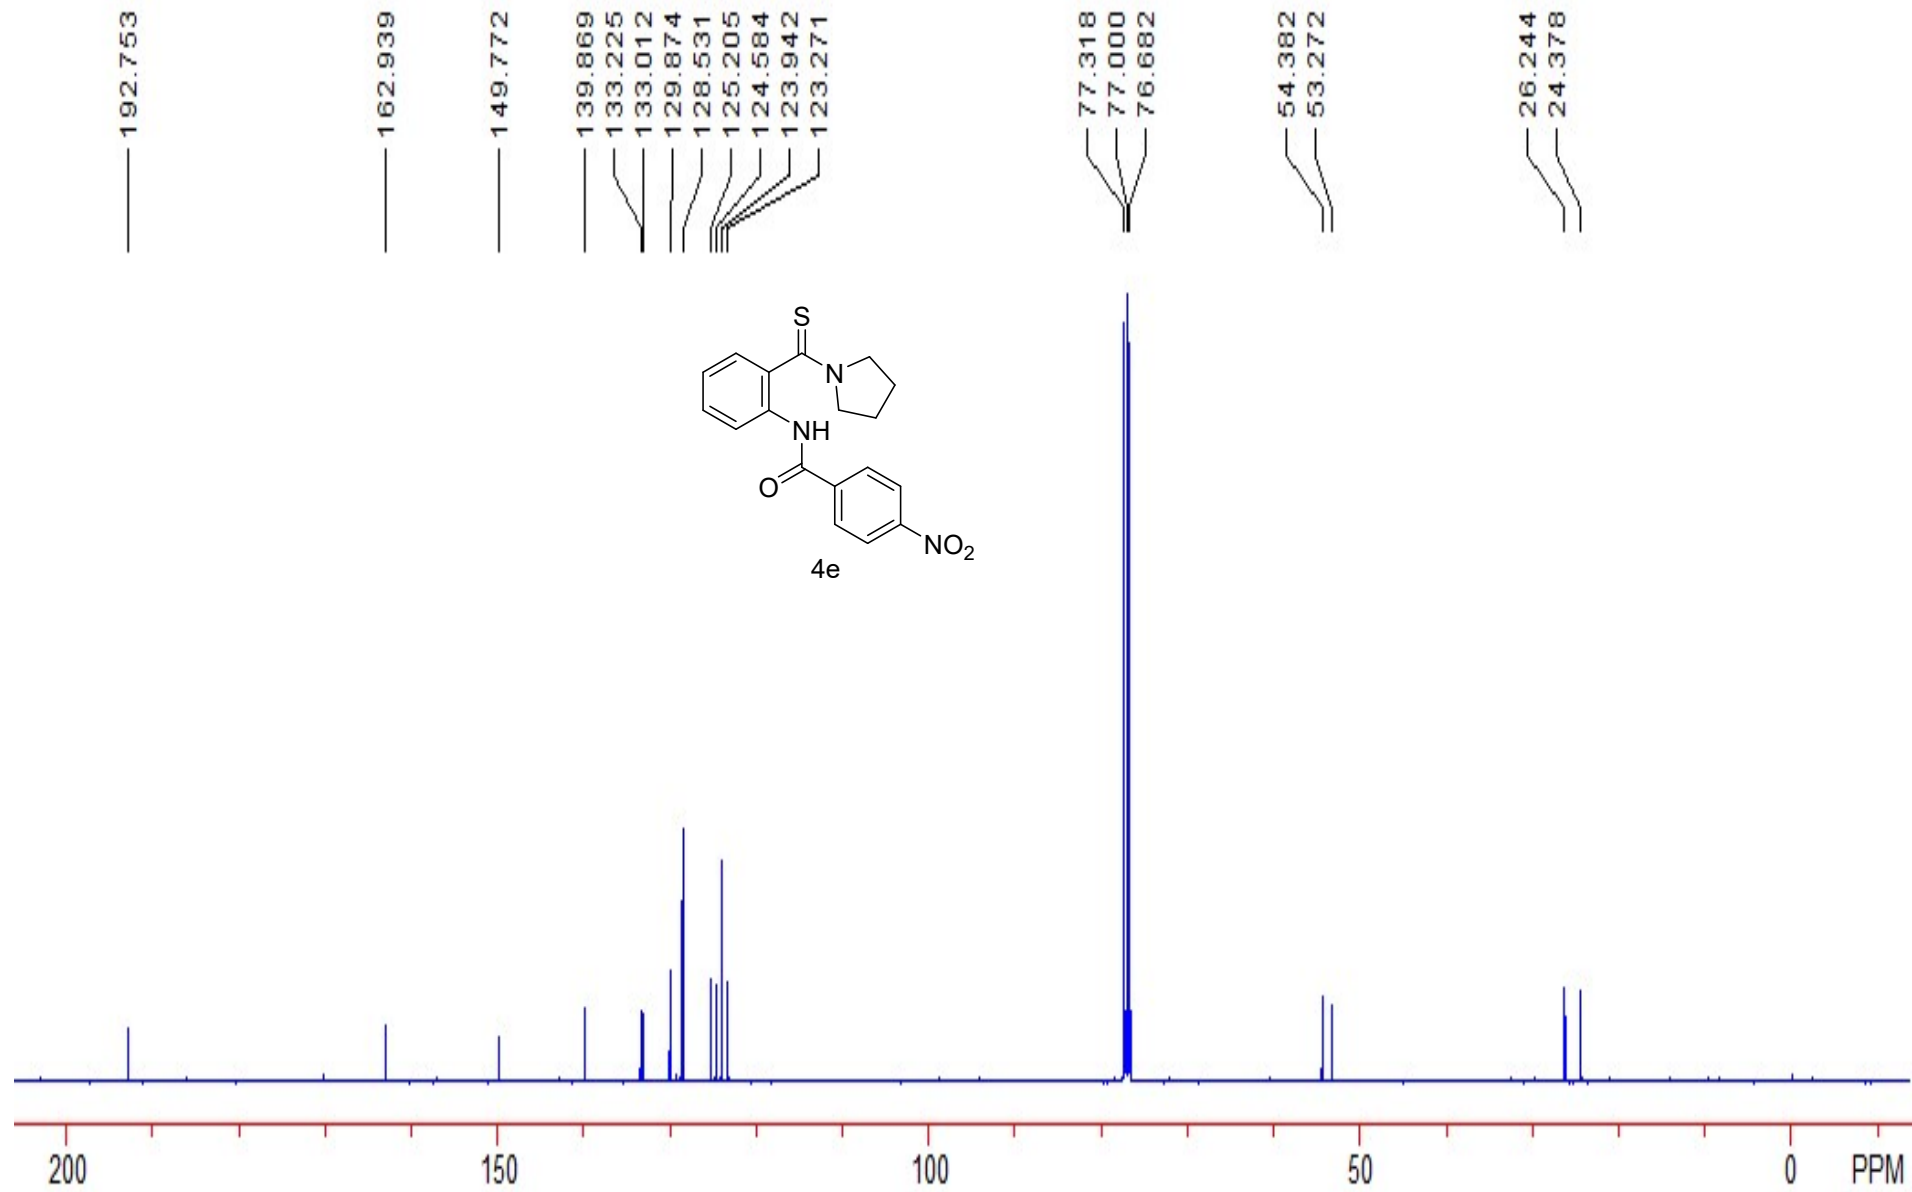

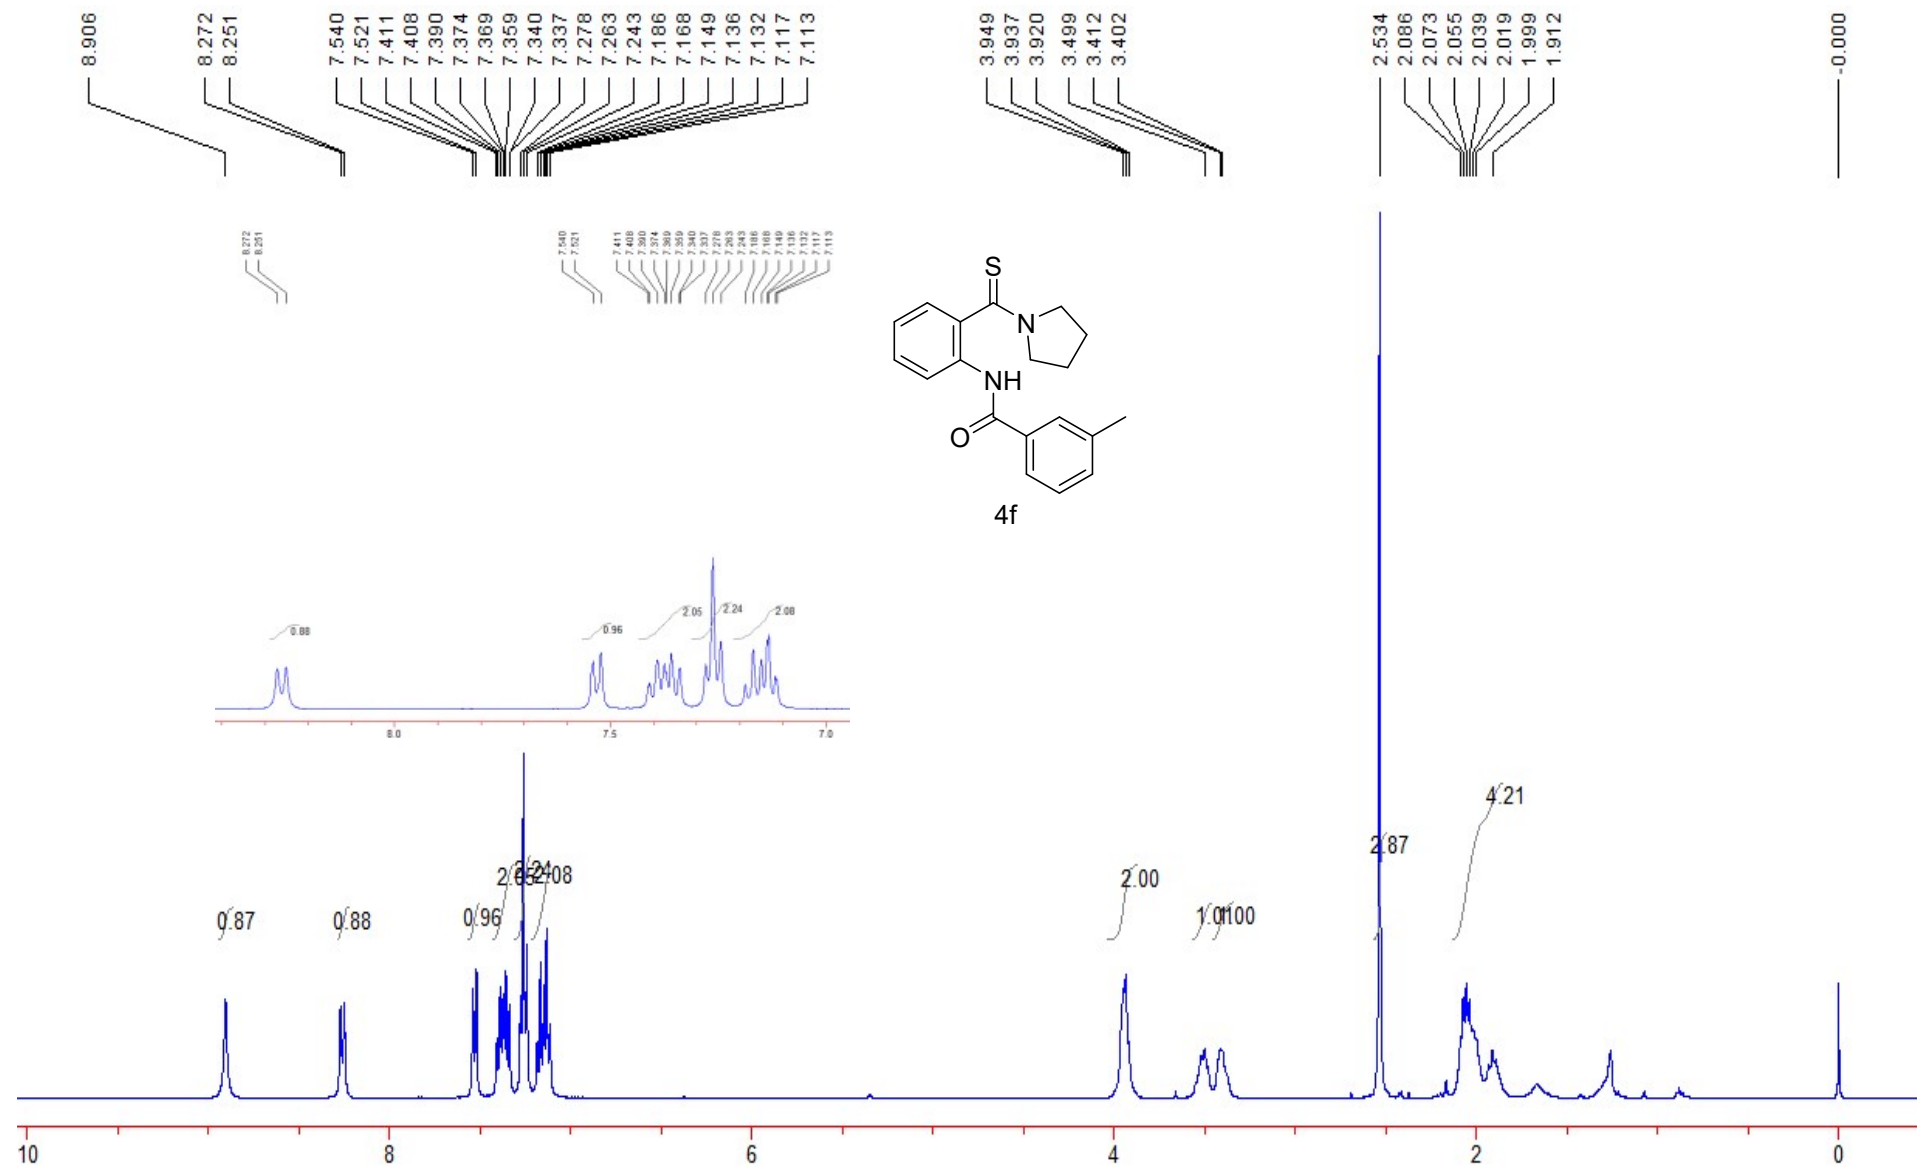

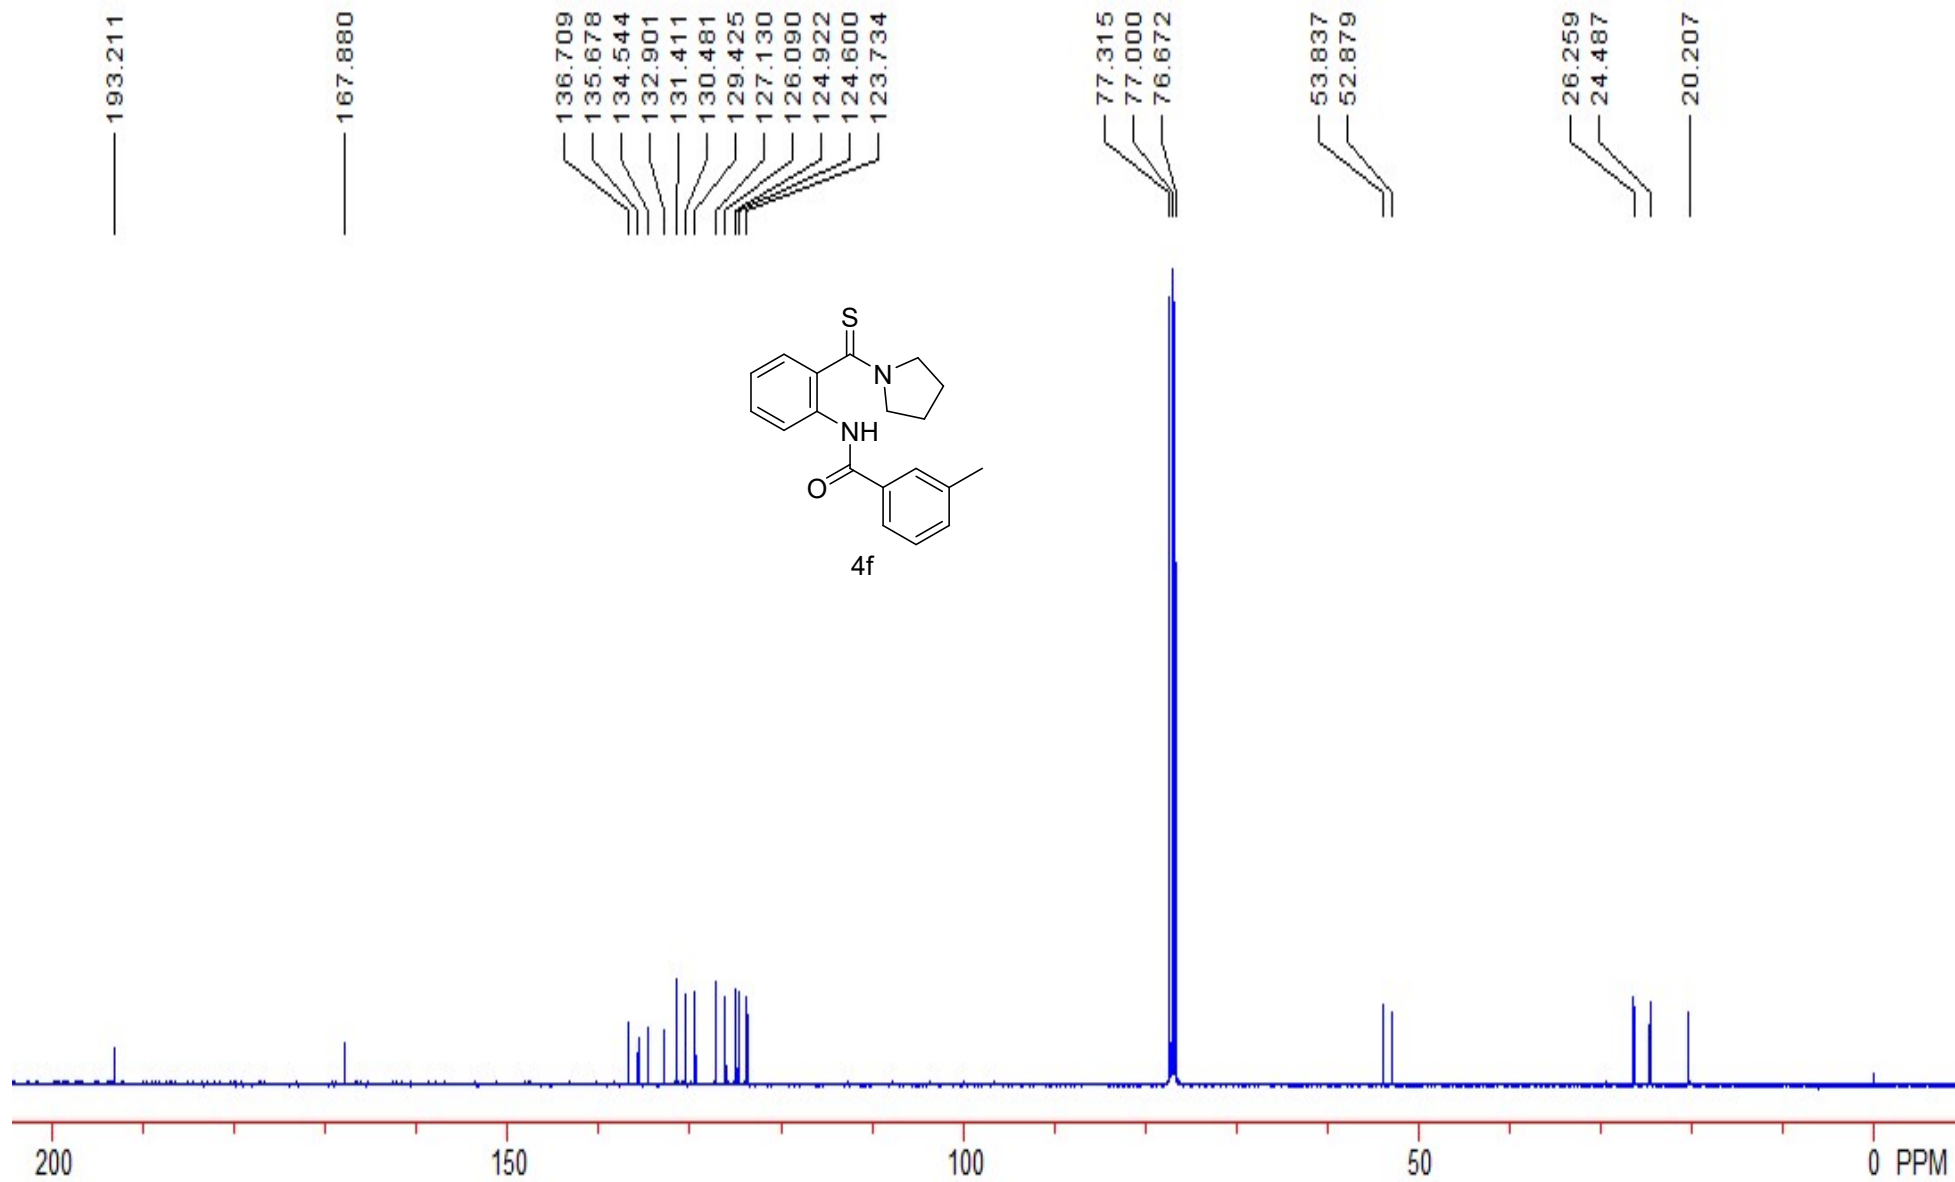

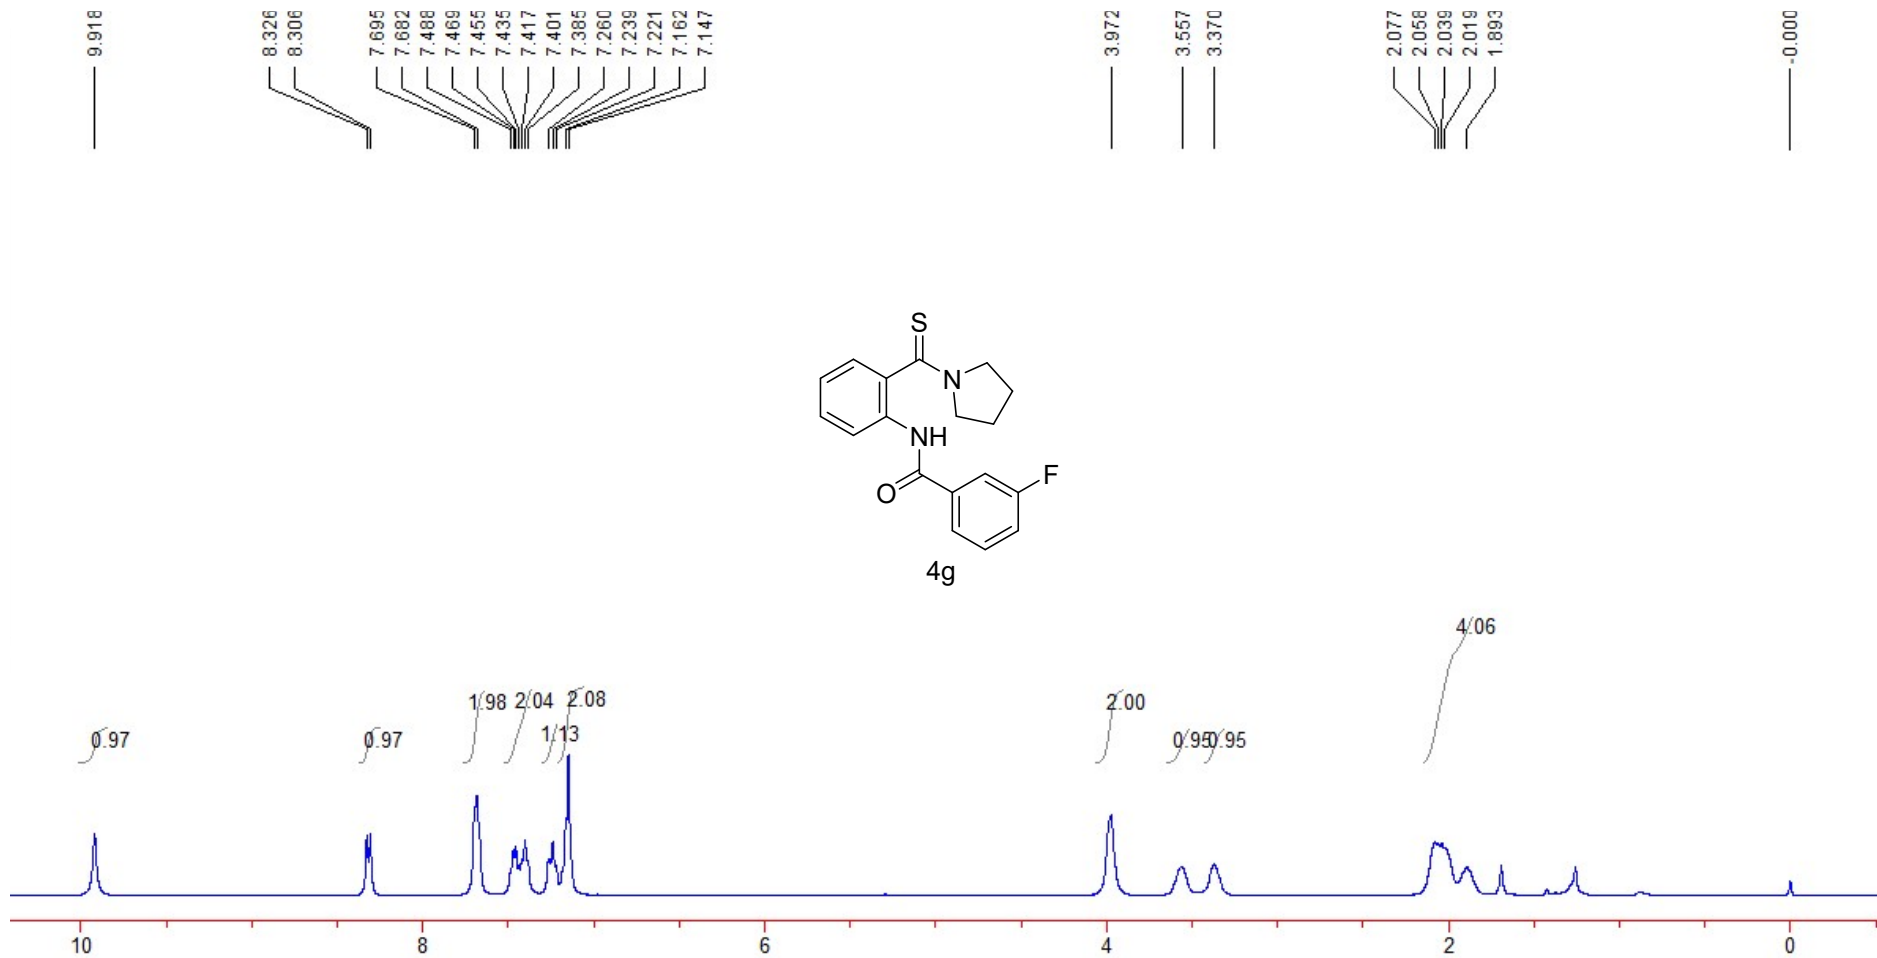

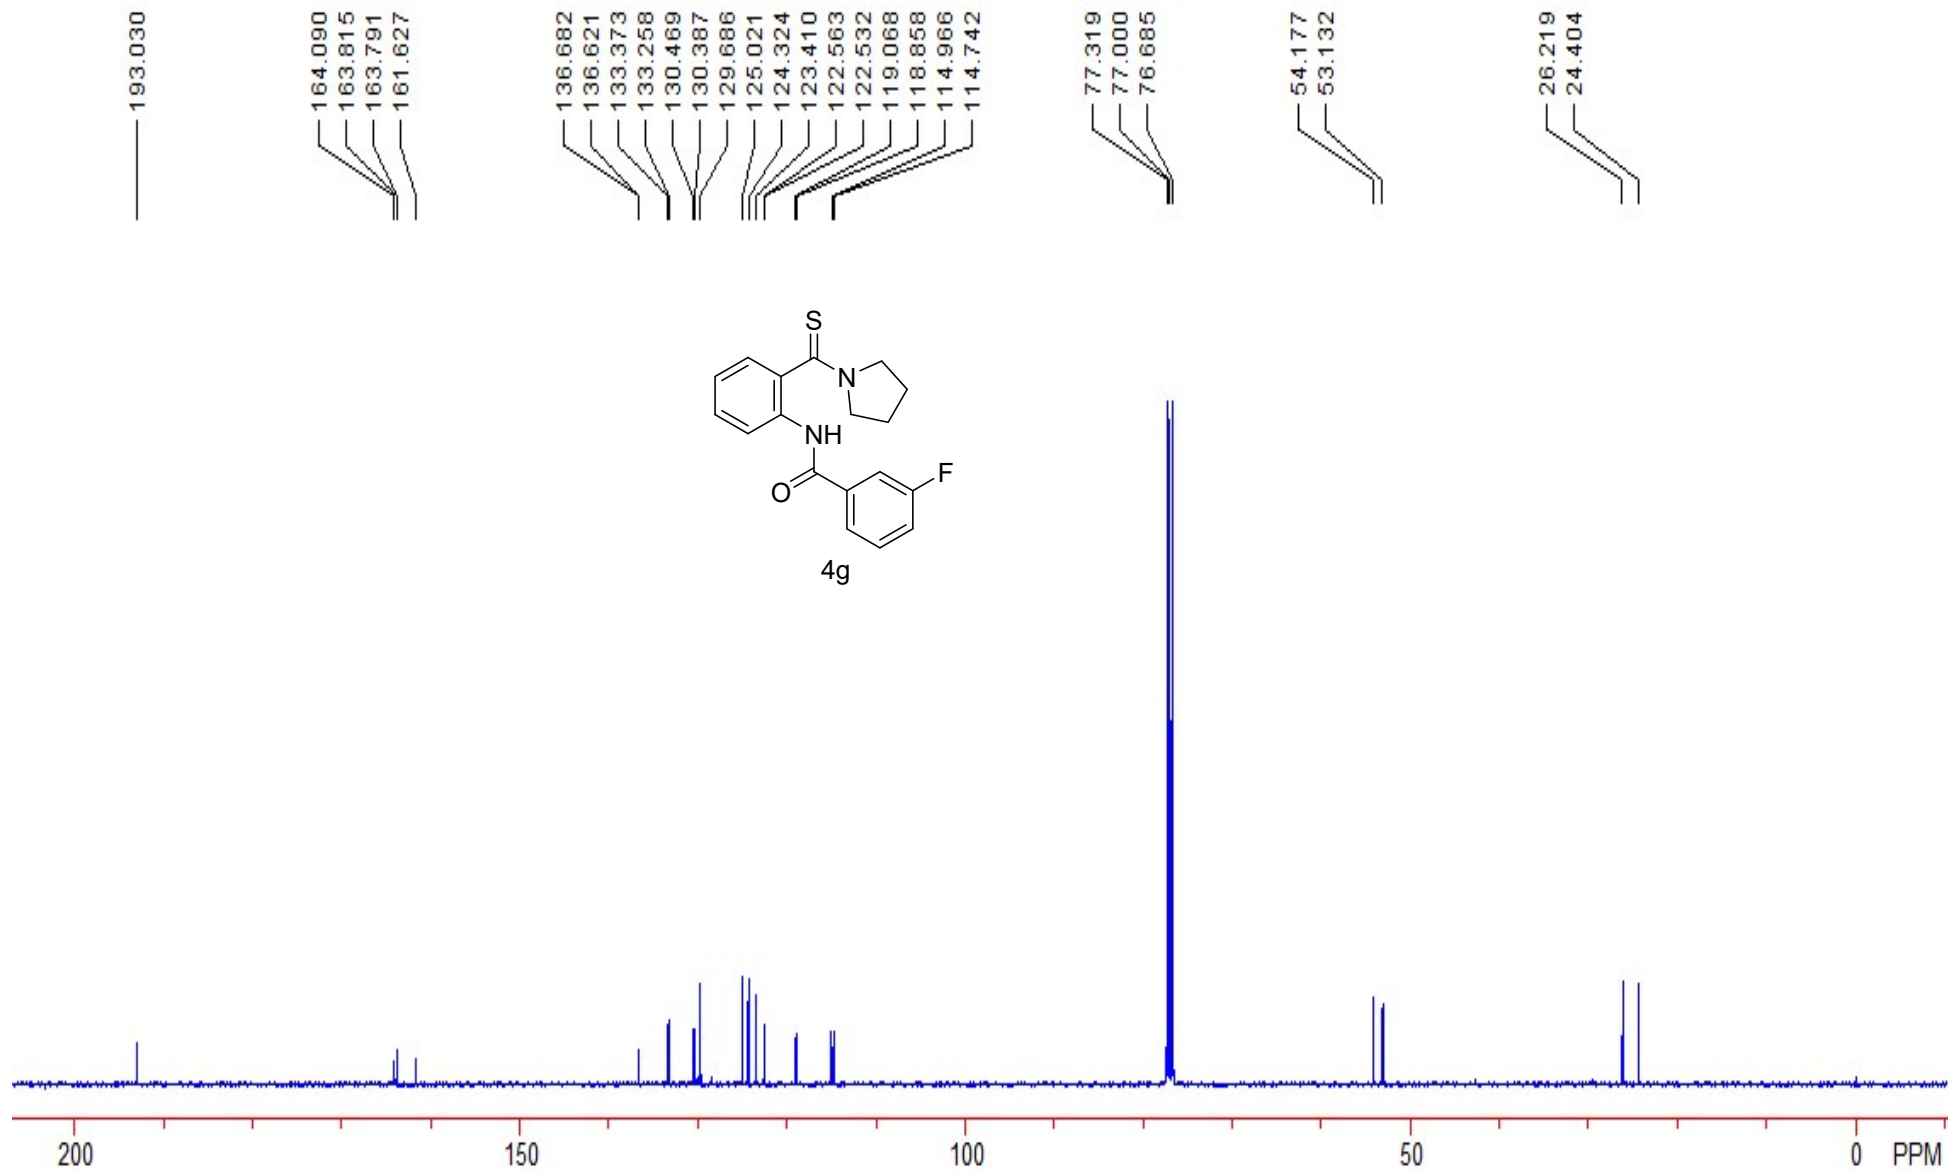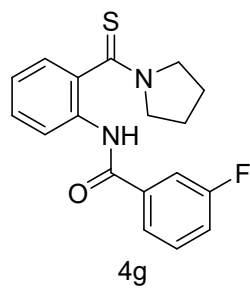

gaopeng-1.564.fid

-63.20

-111.92

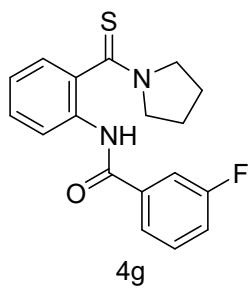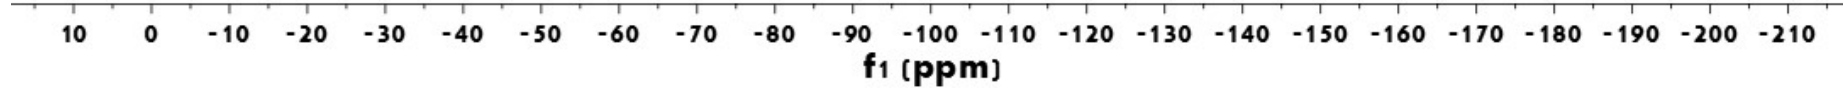



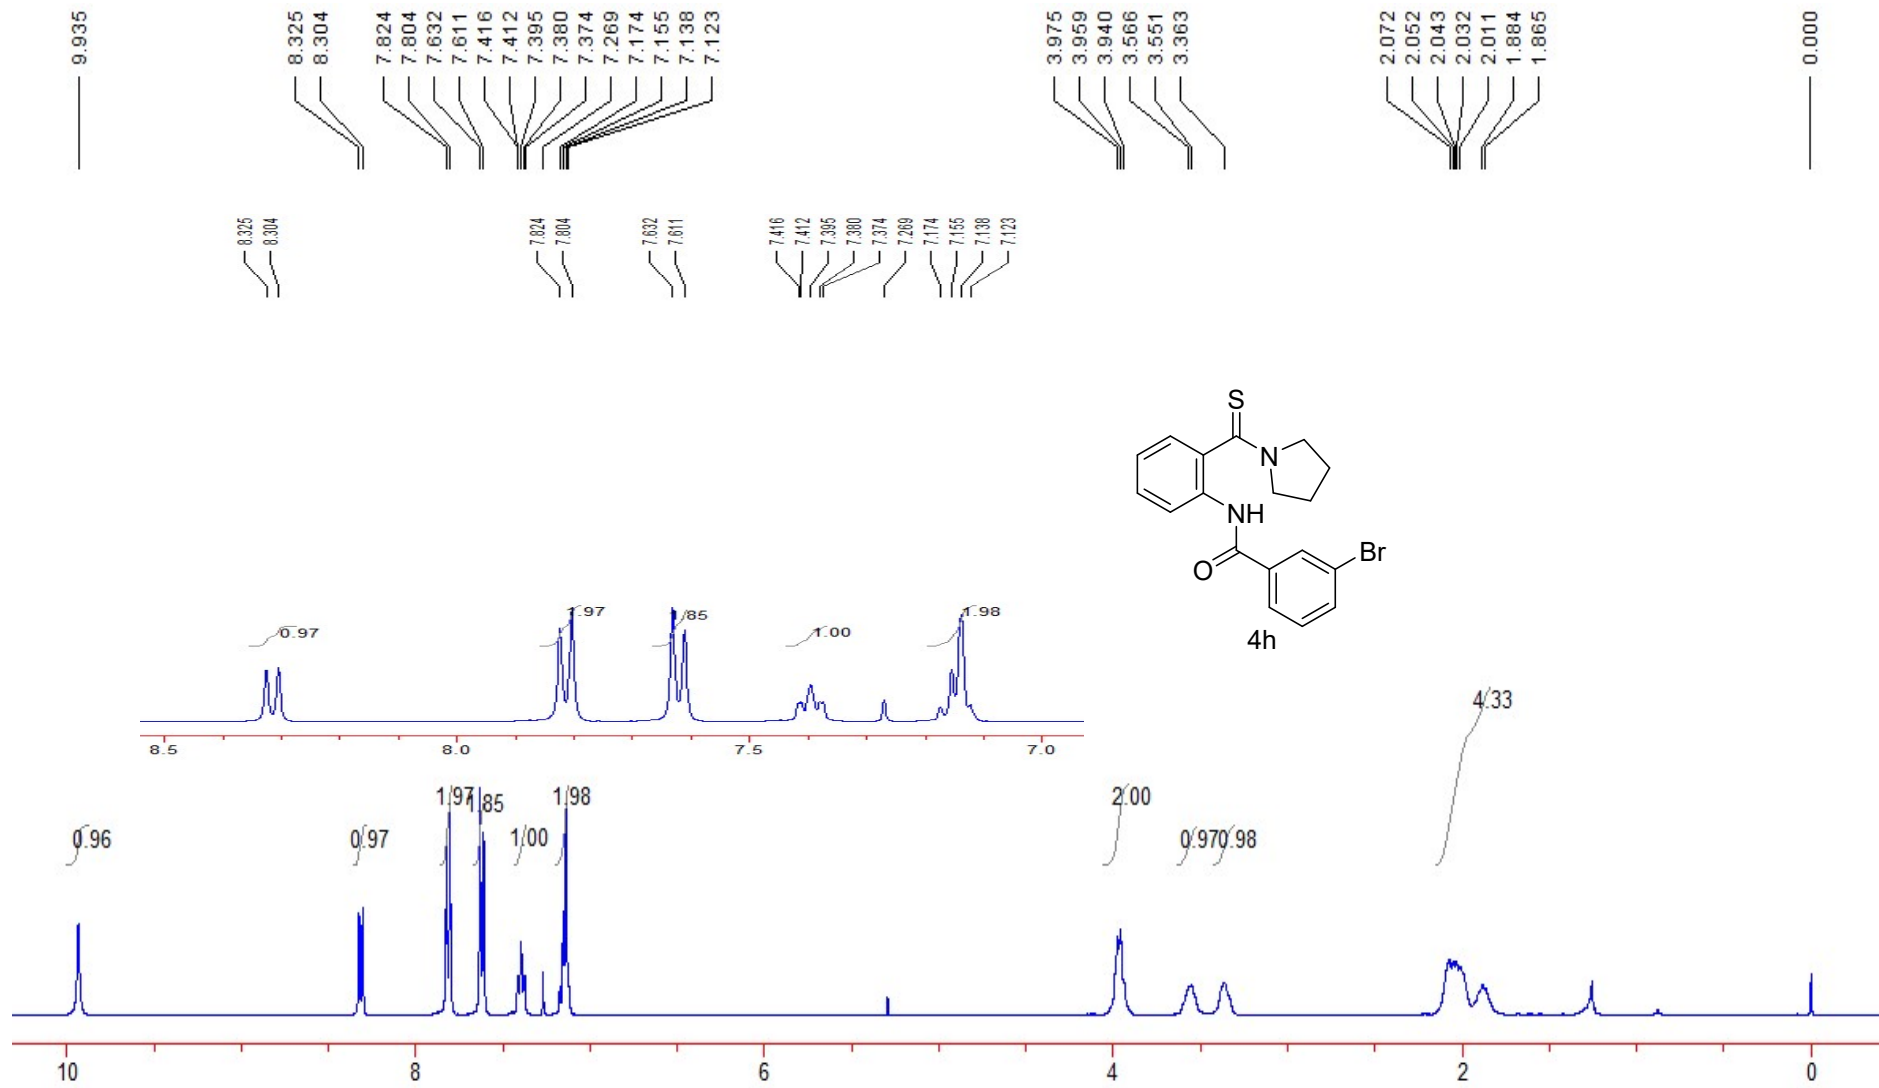

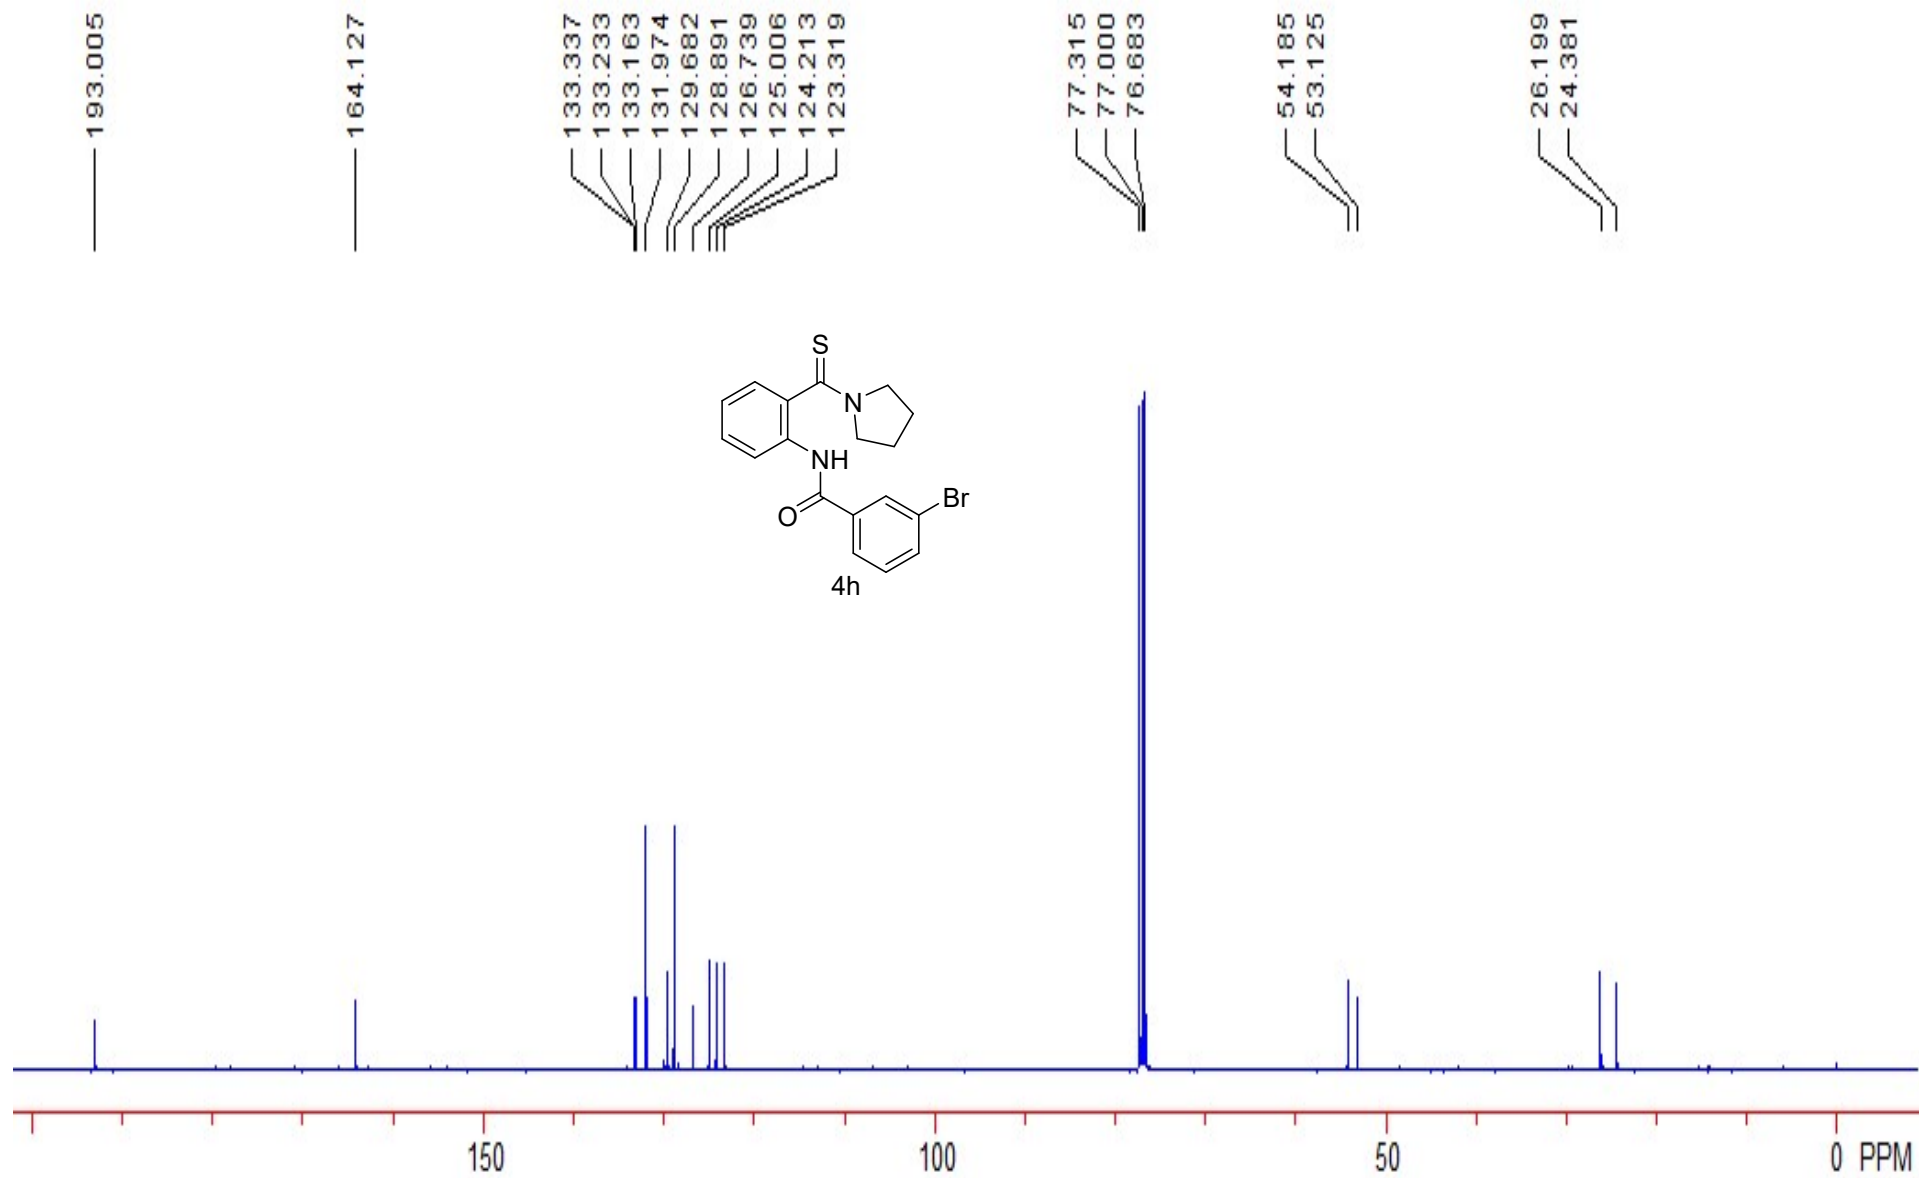

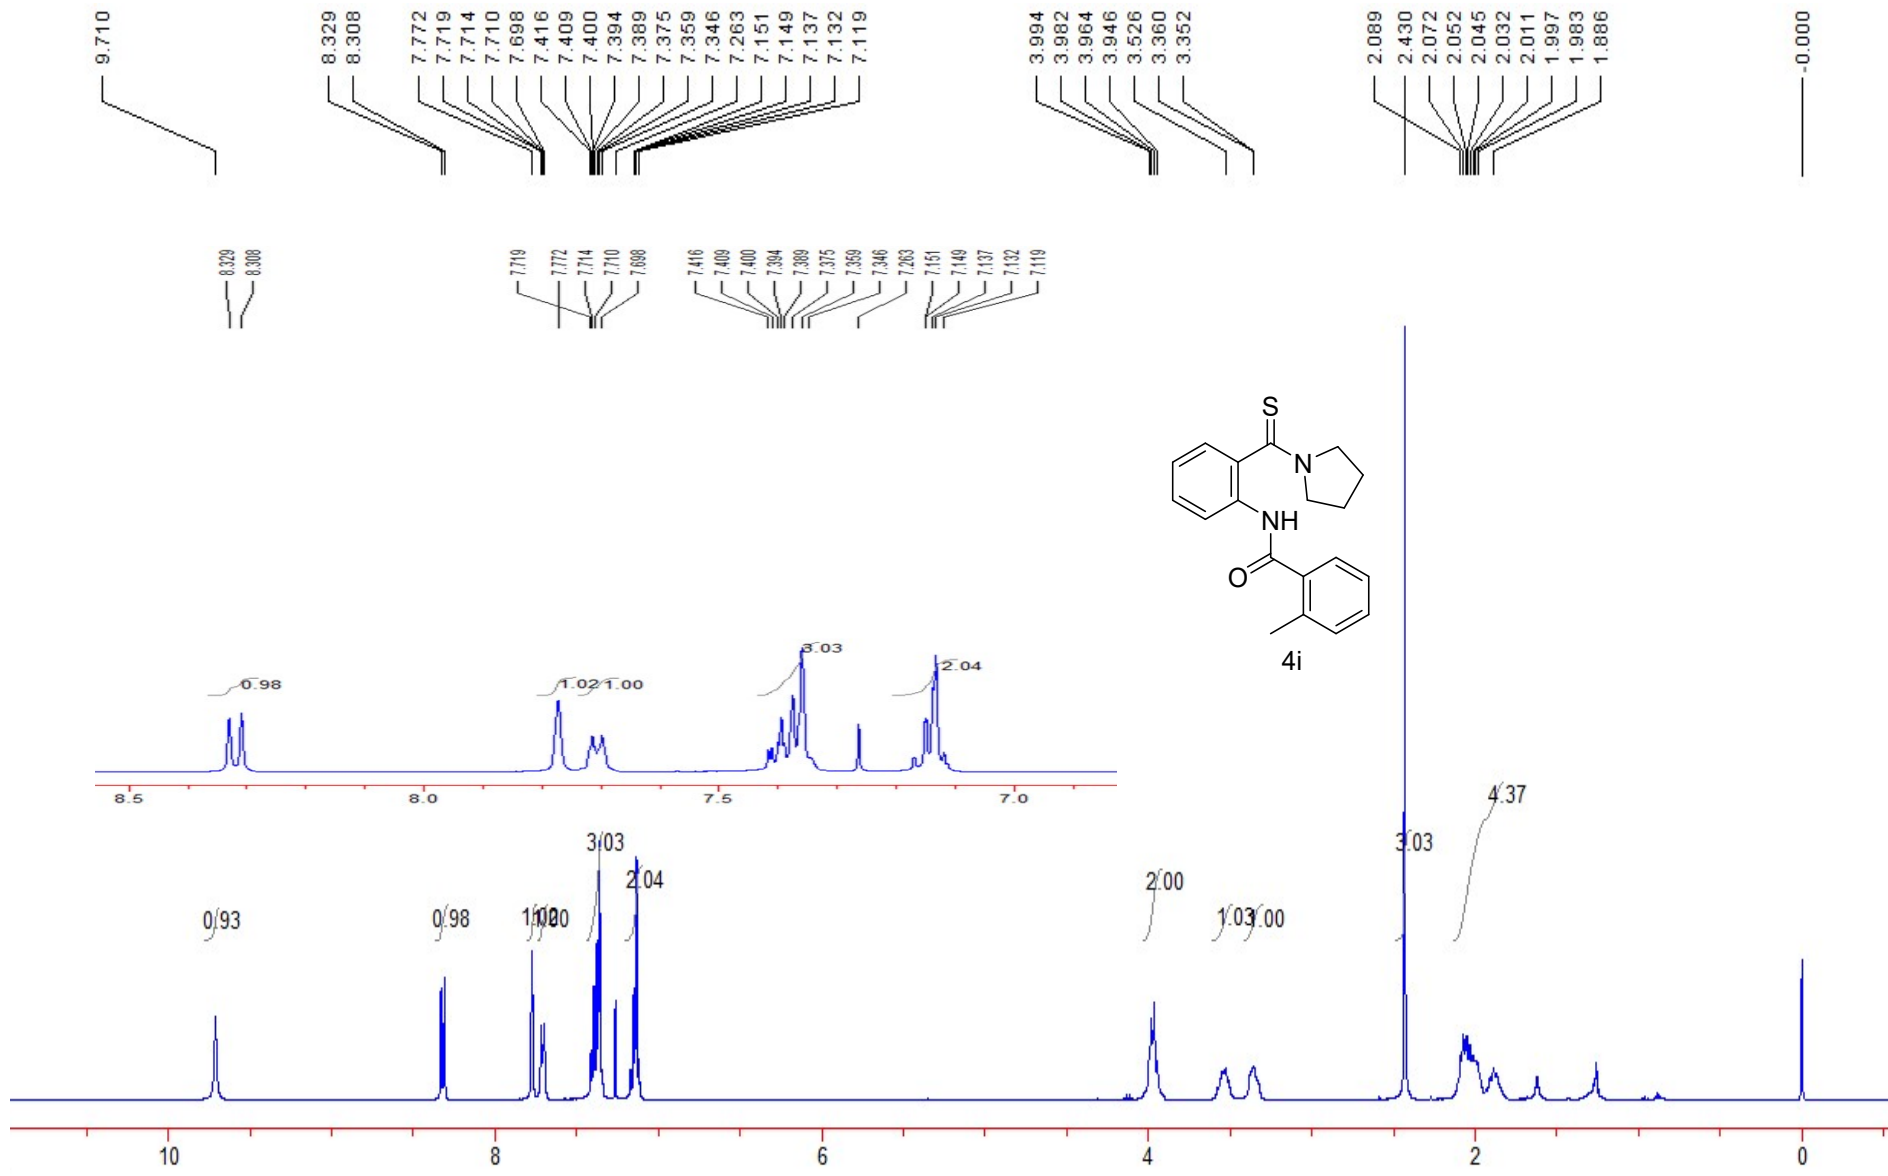

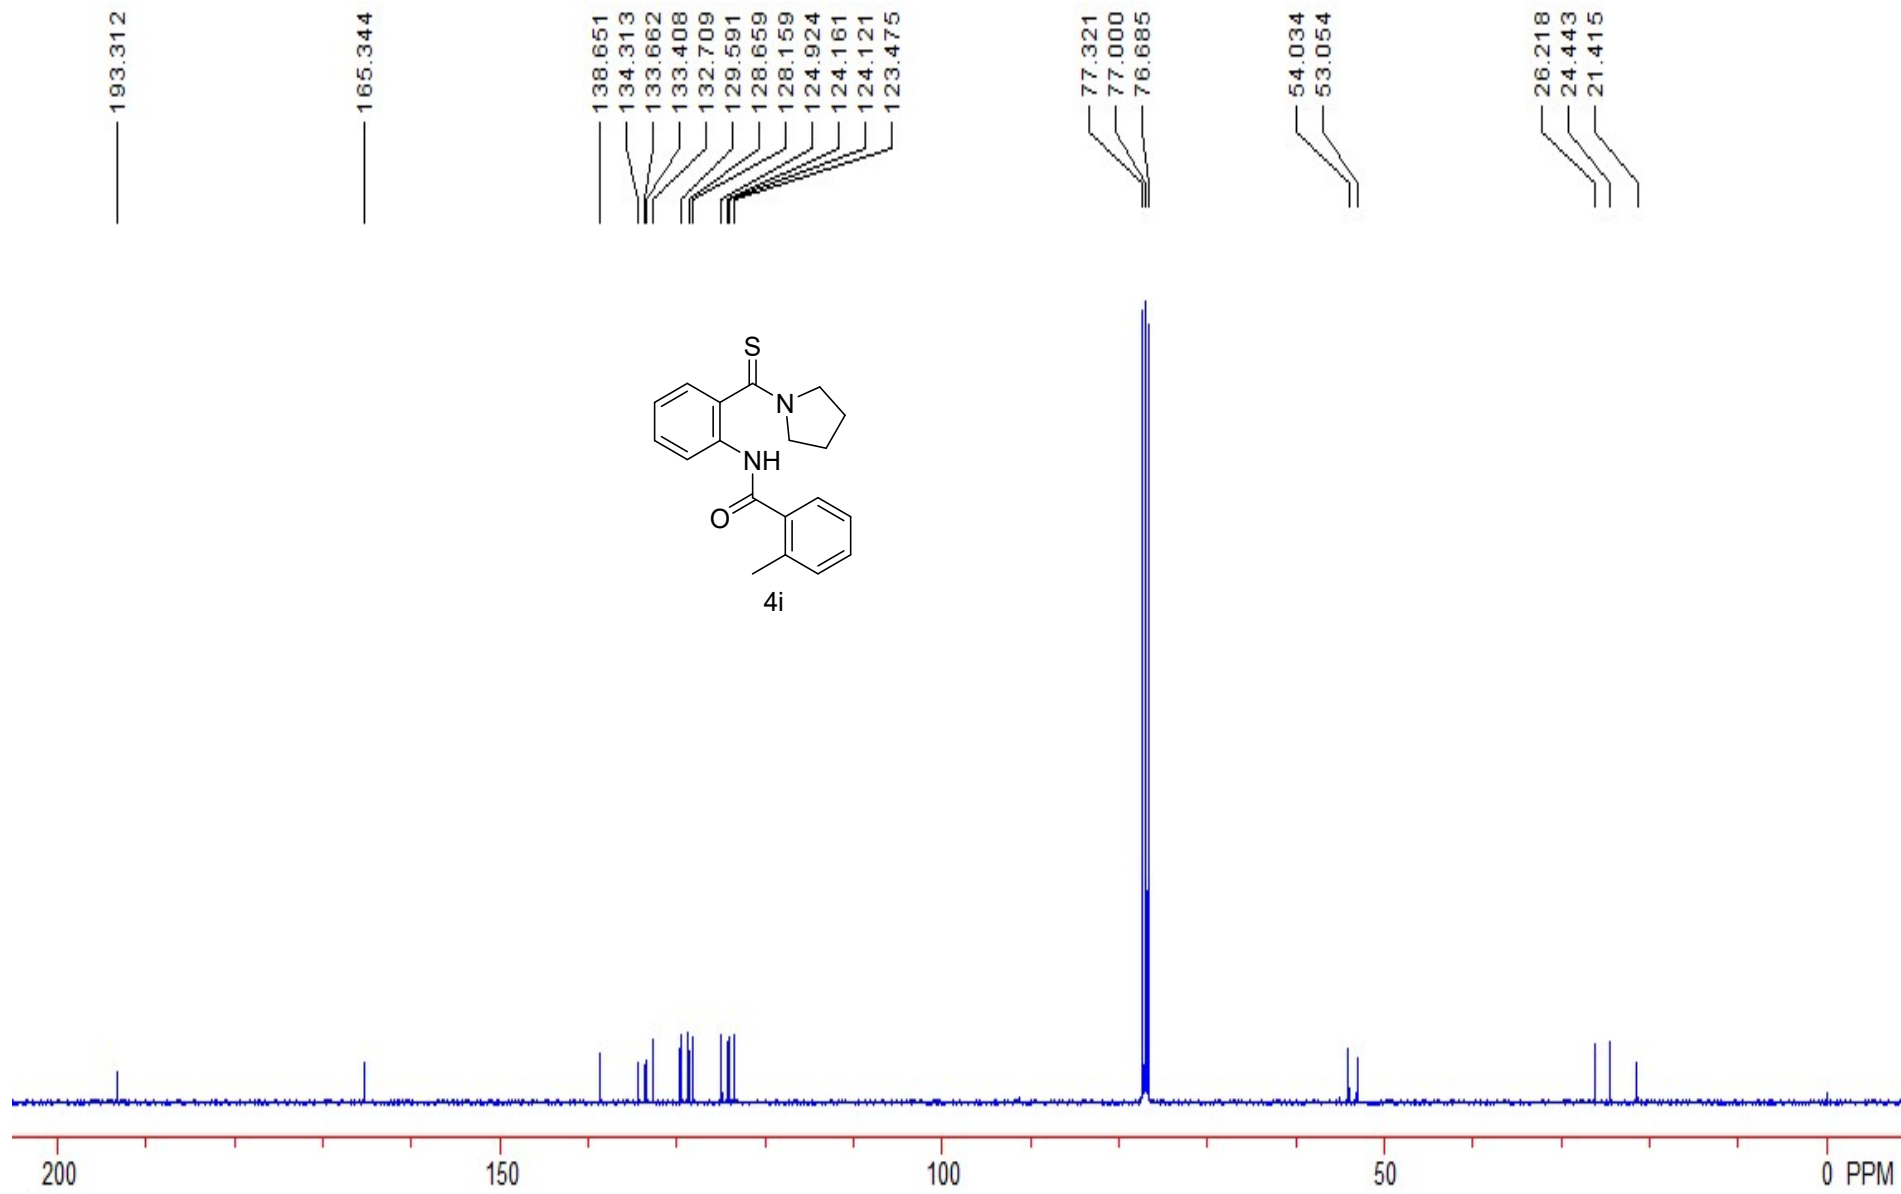

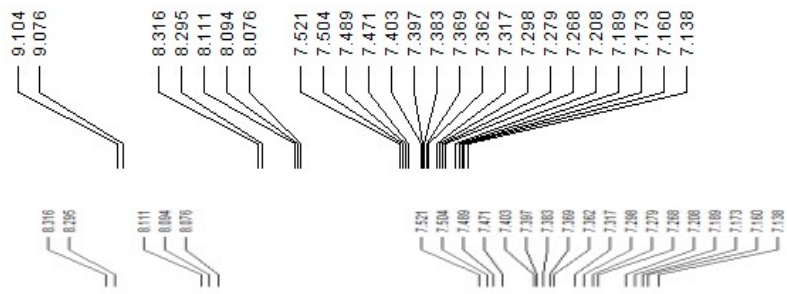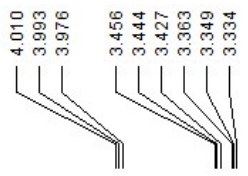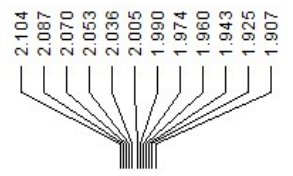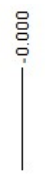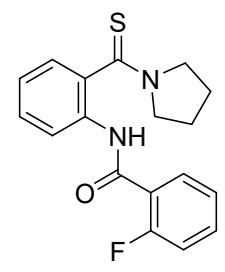

4j

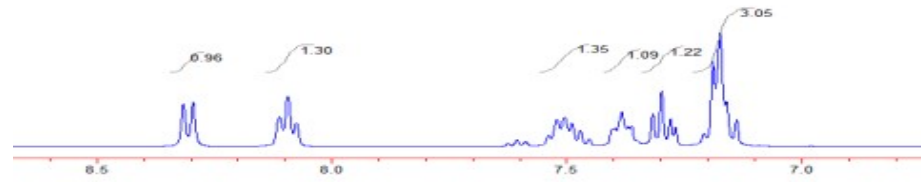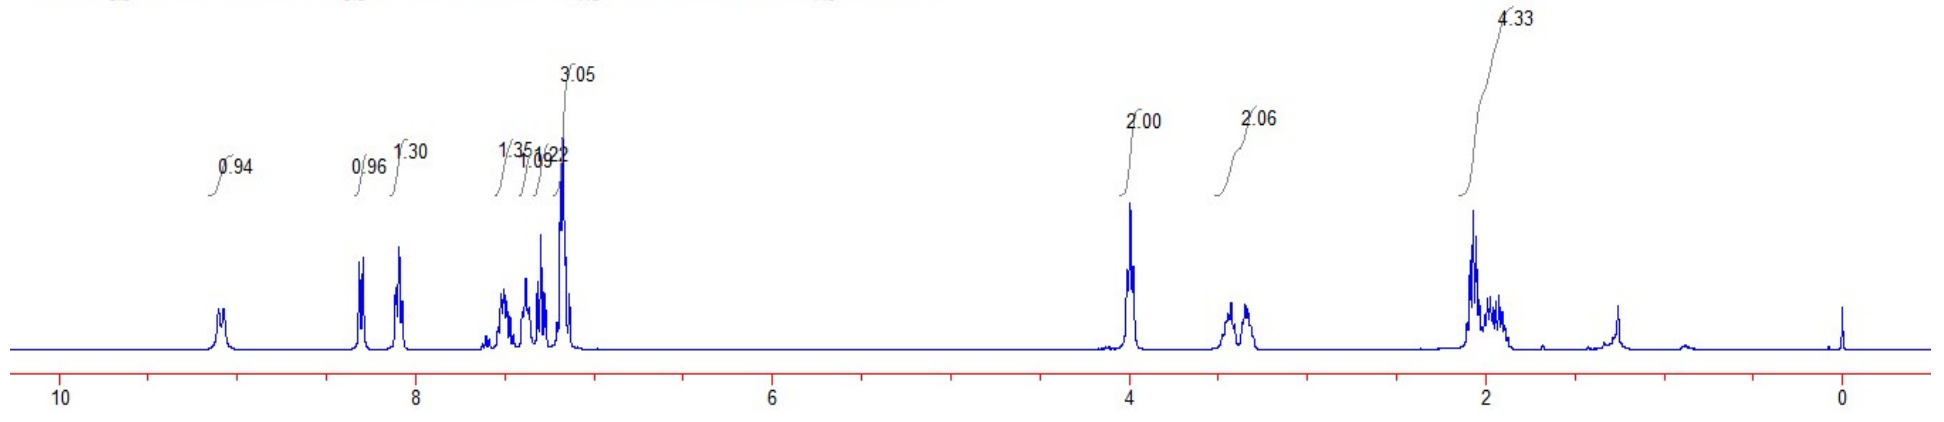

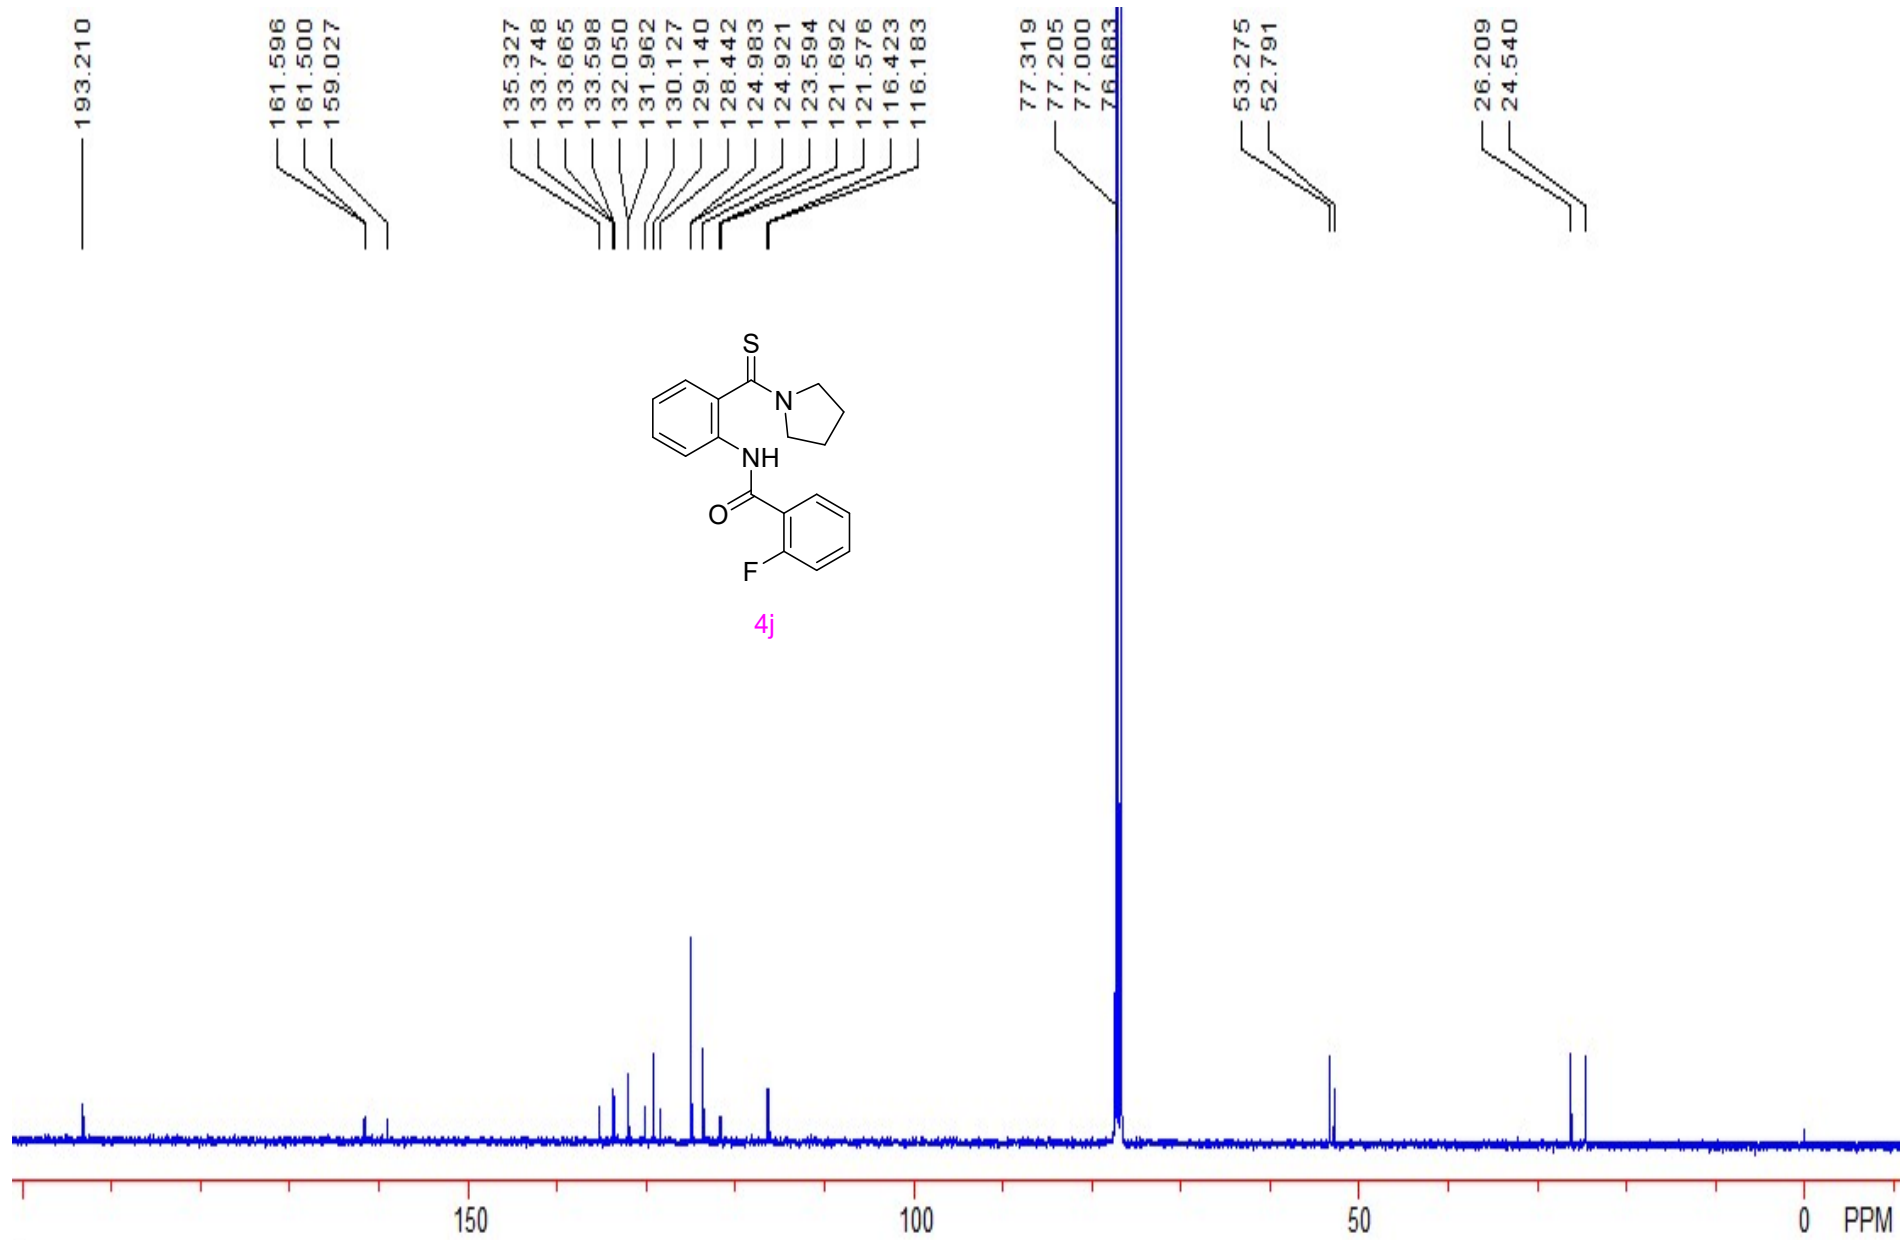

gaopeng-1.565.fid

63.20

113.65

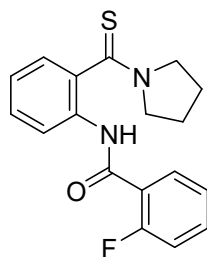

4j

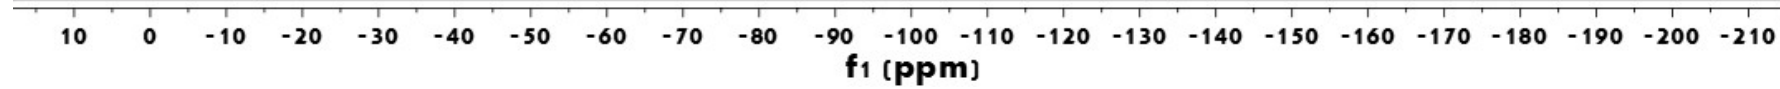

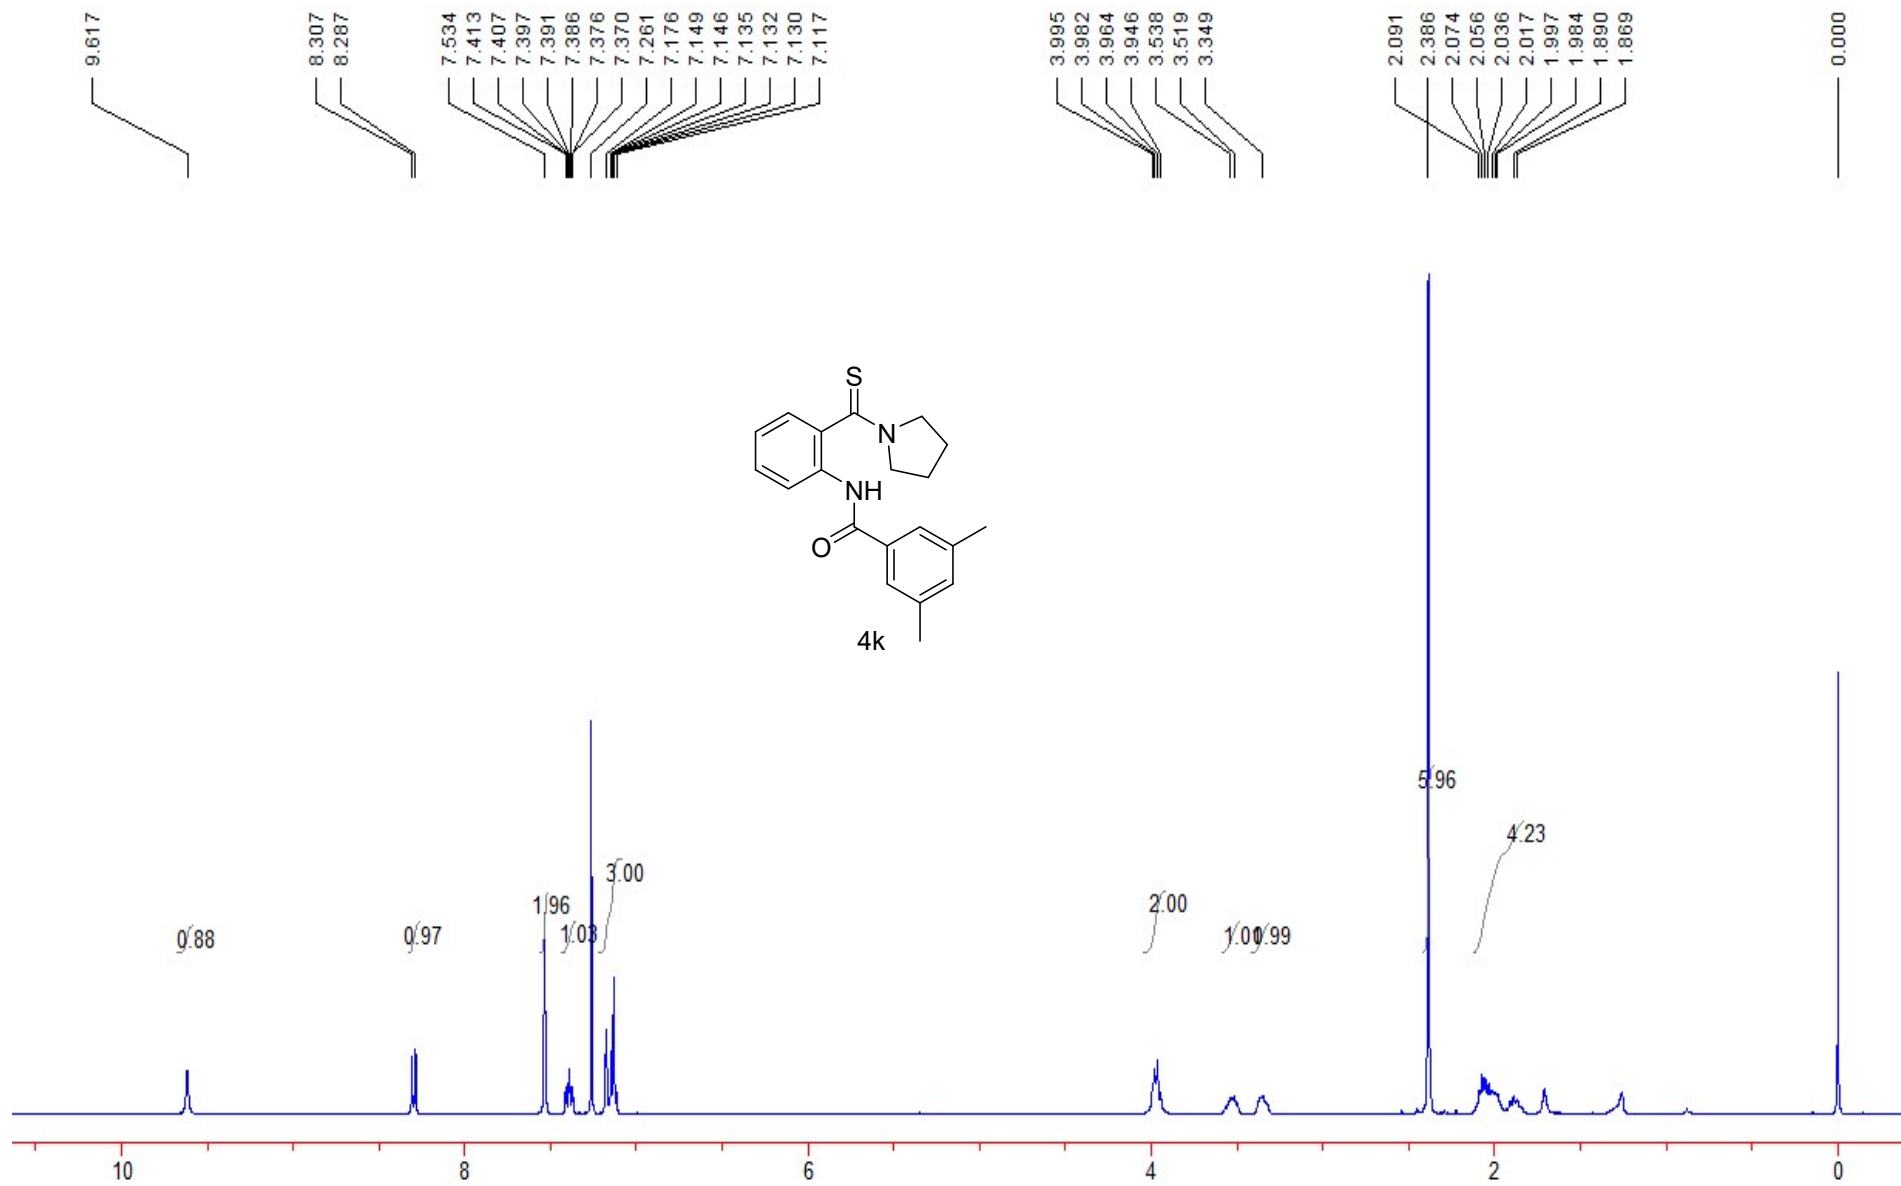



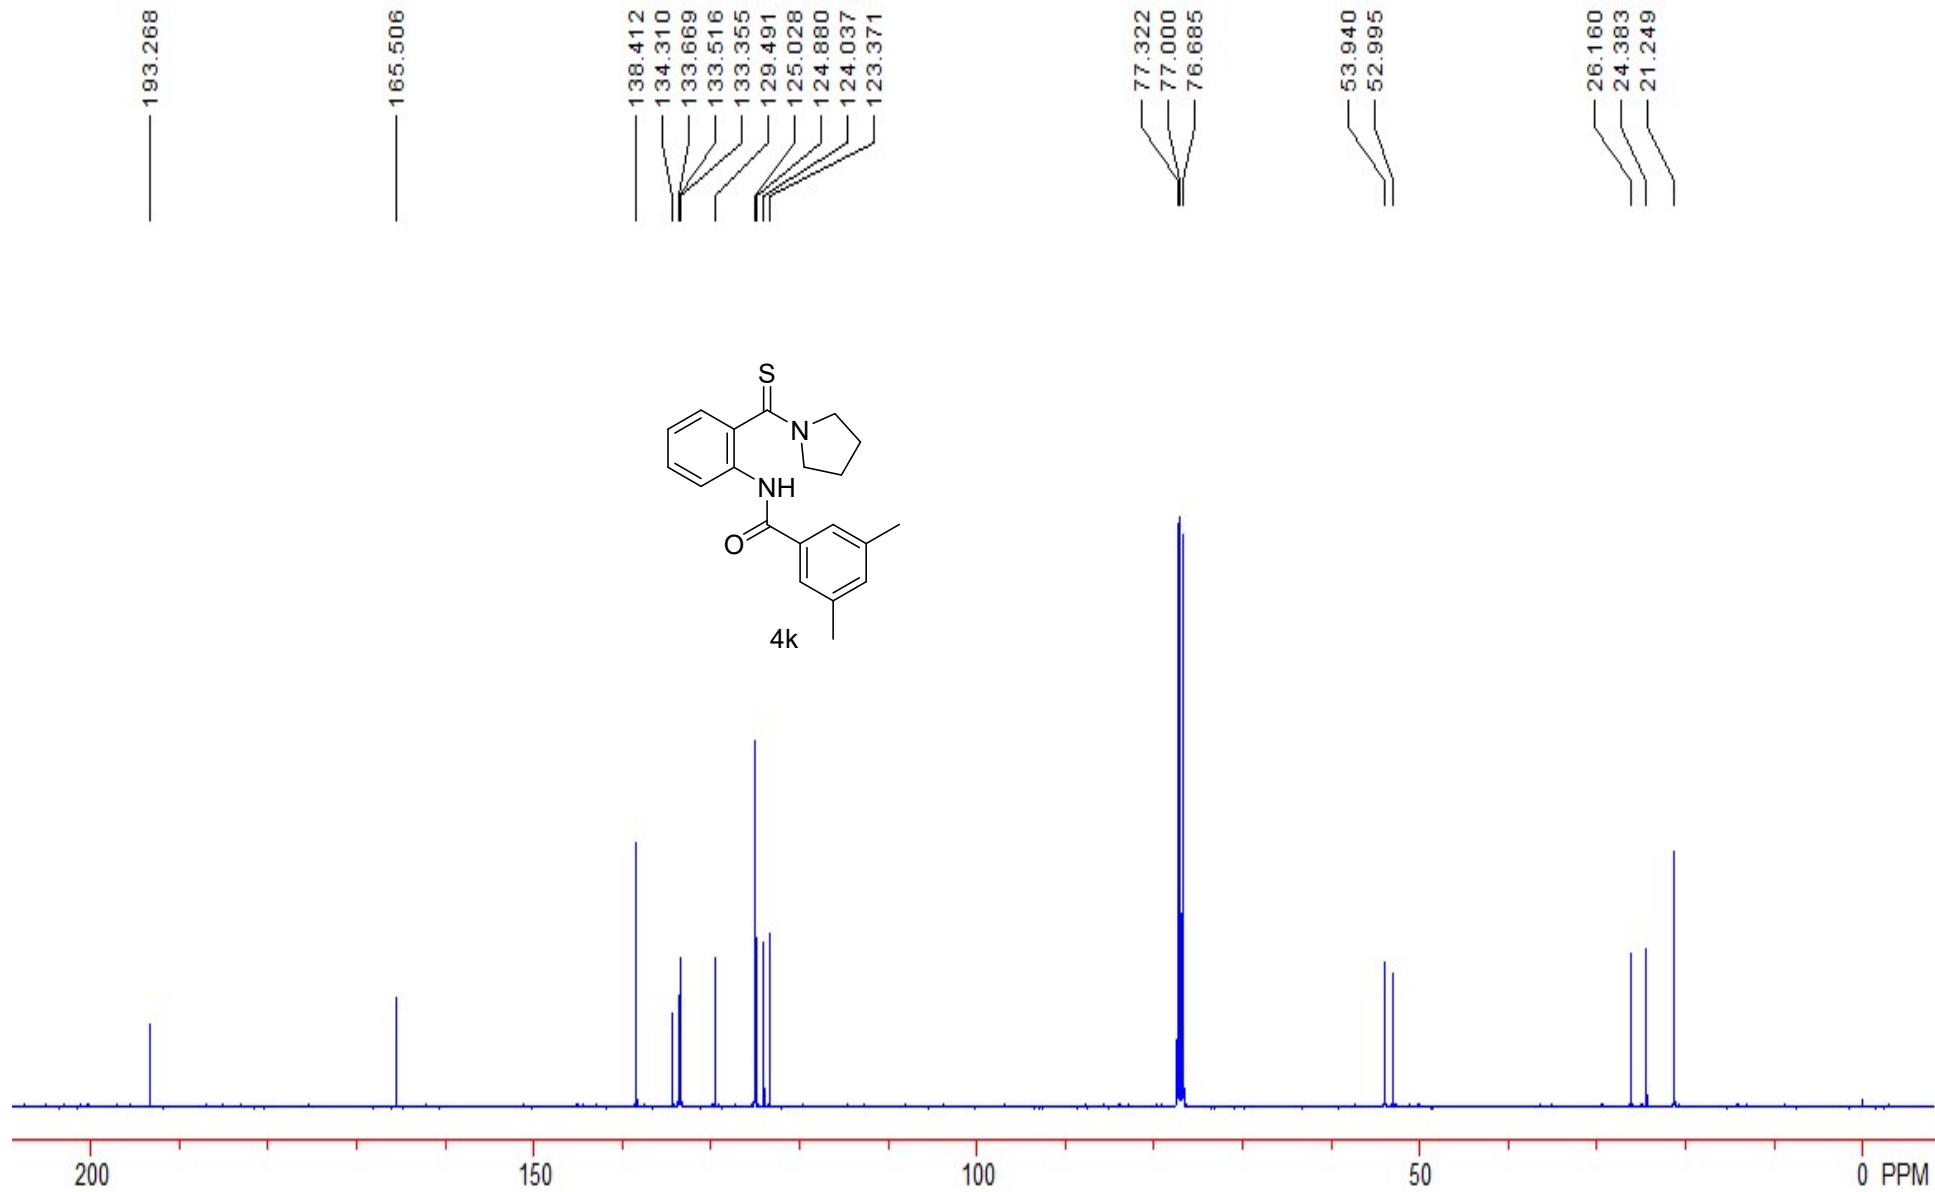

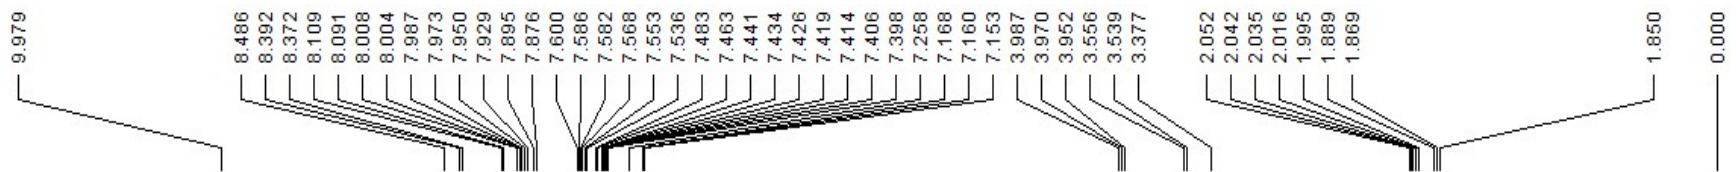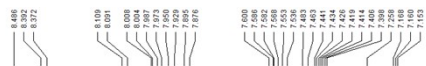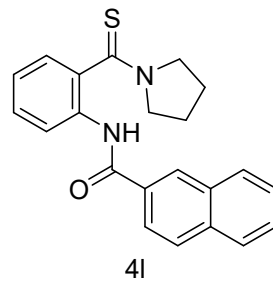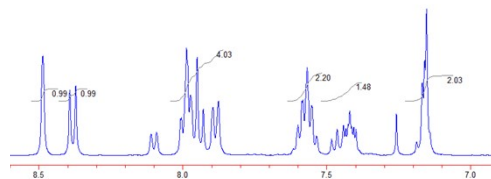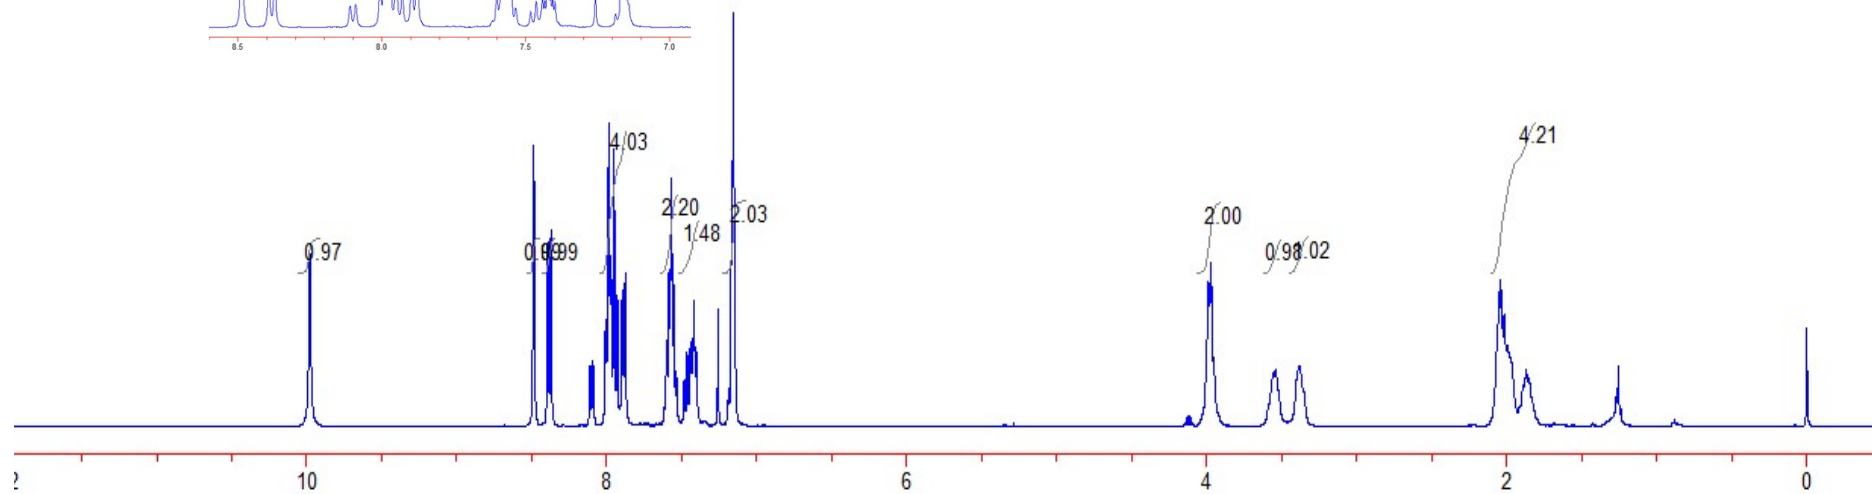

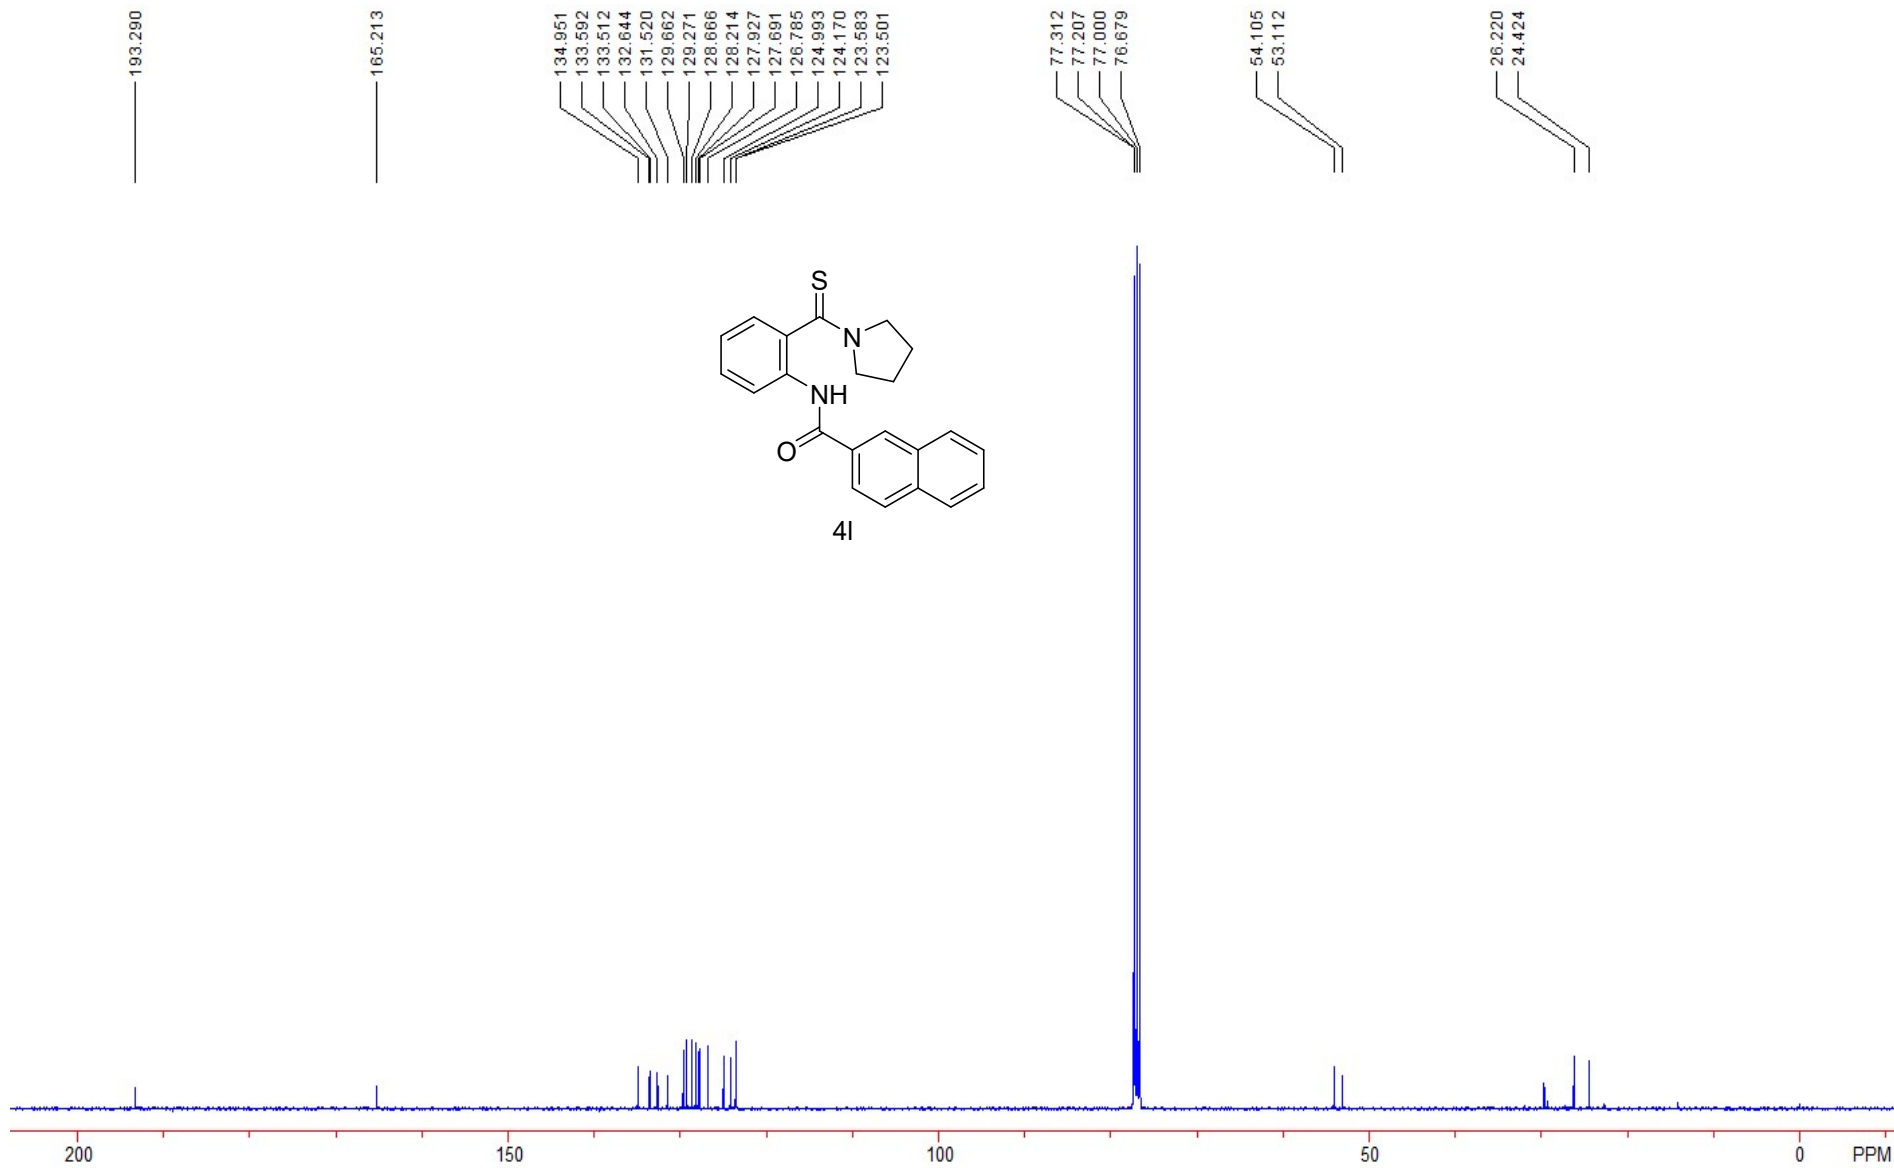

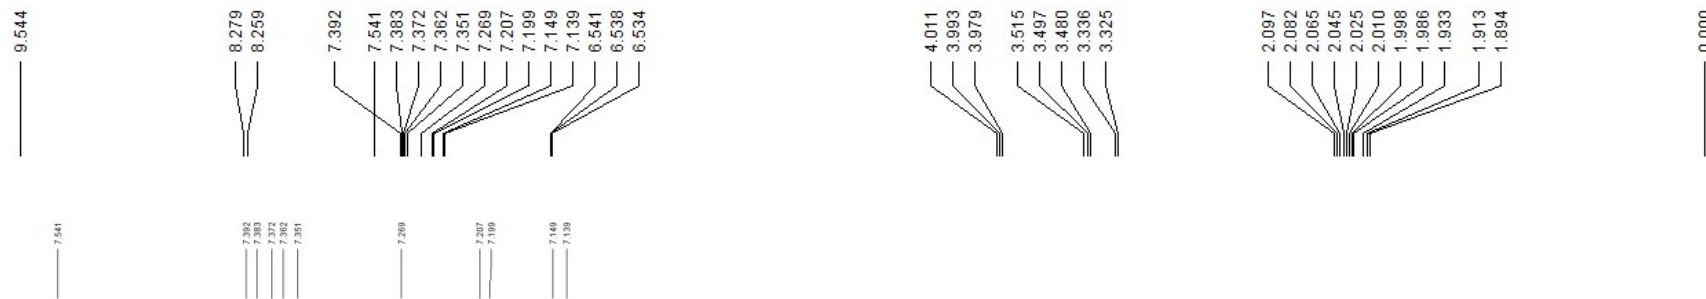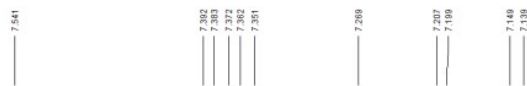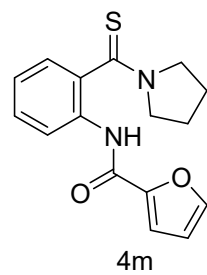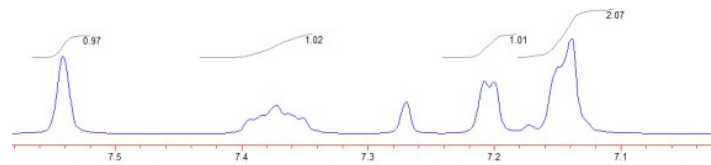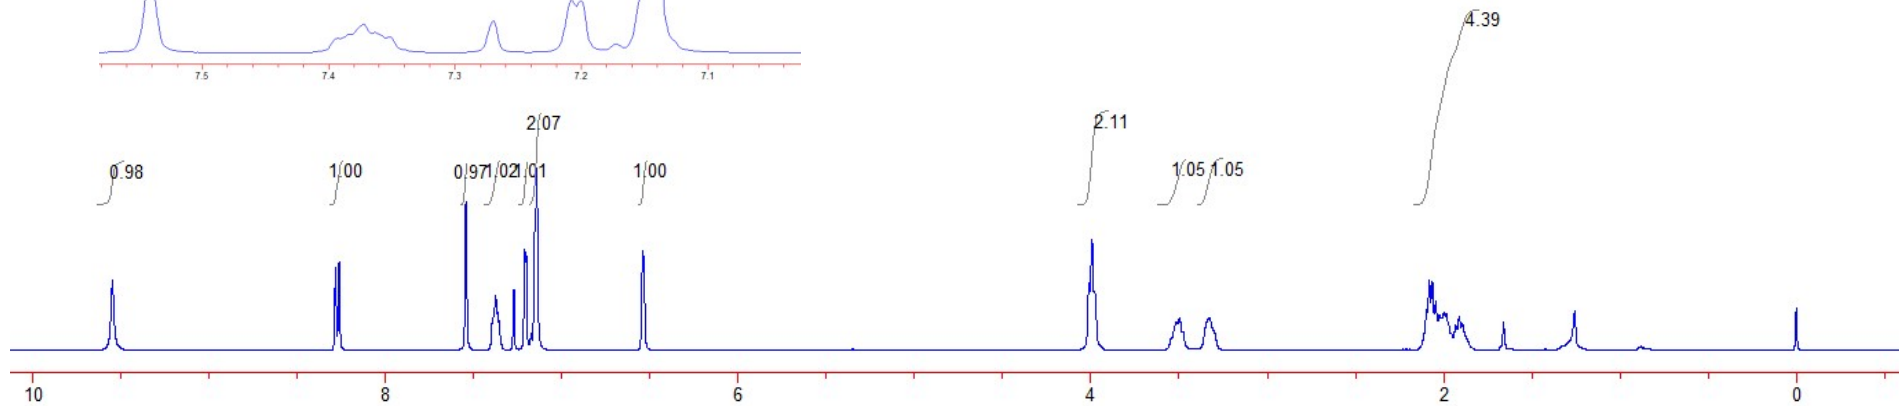

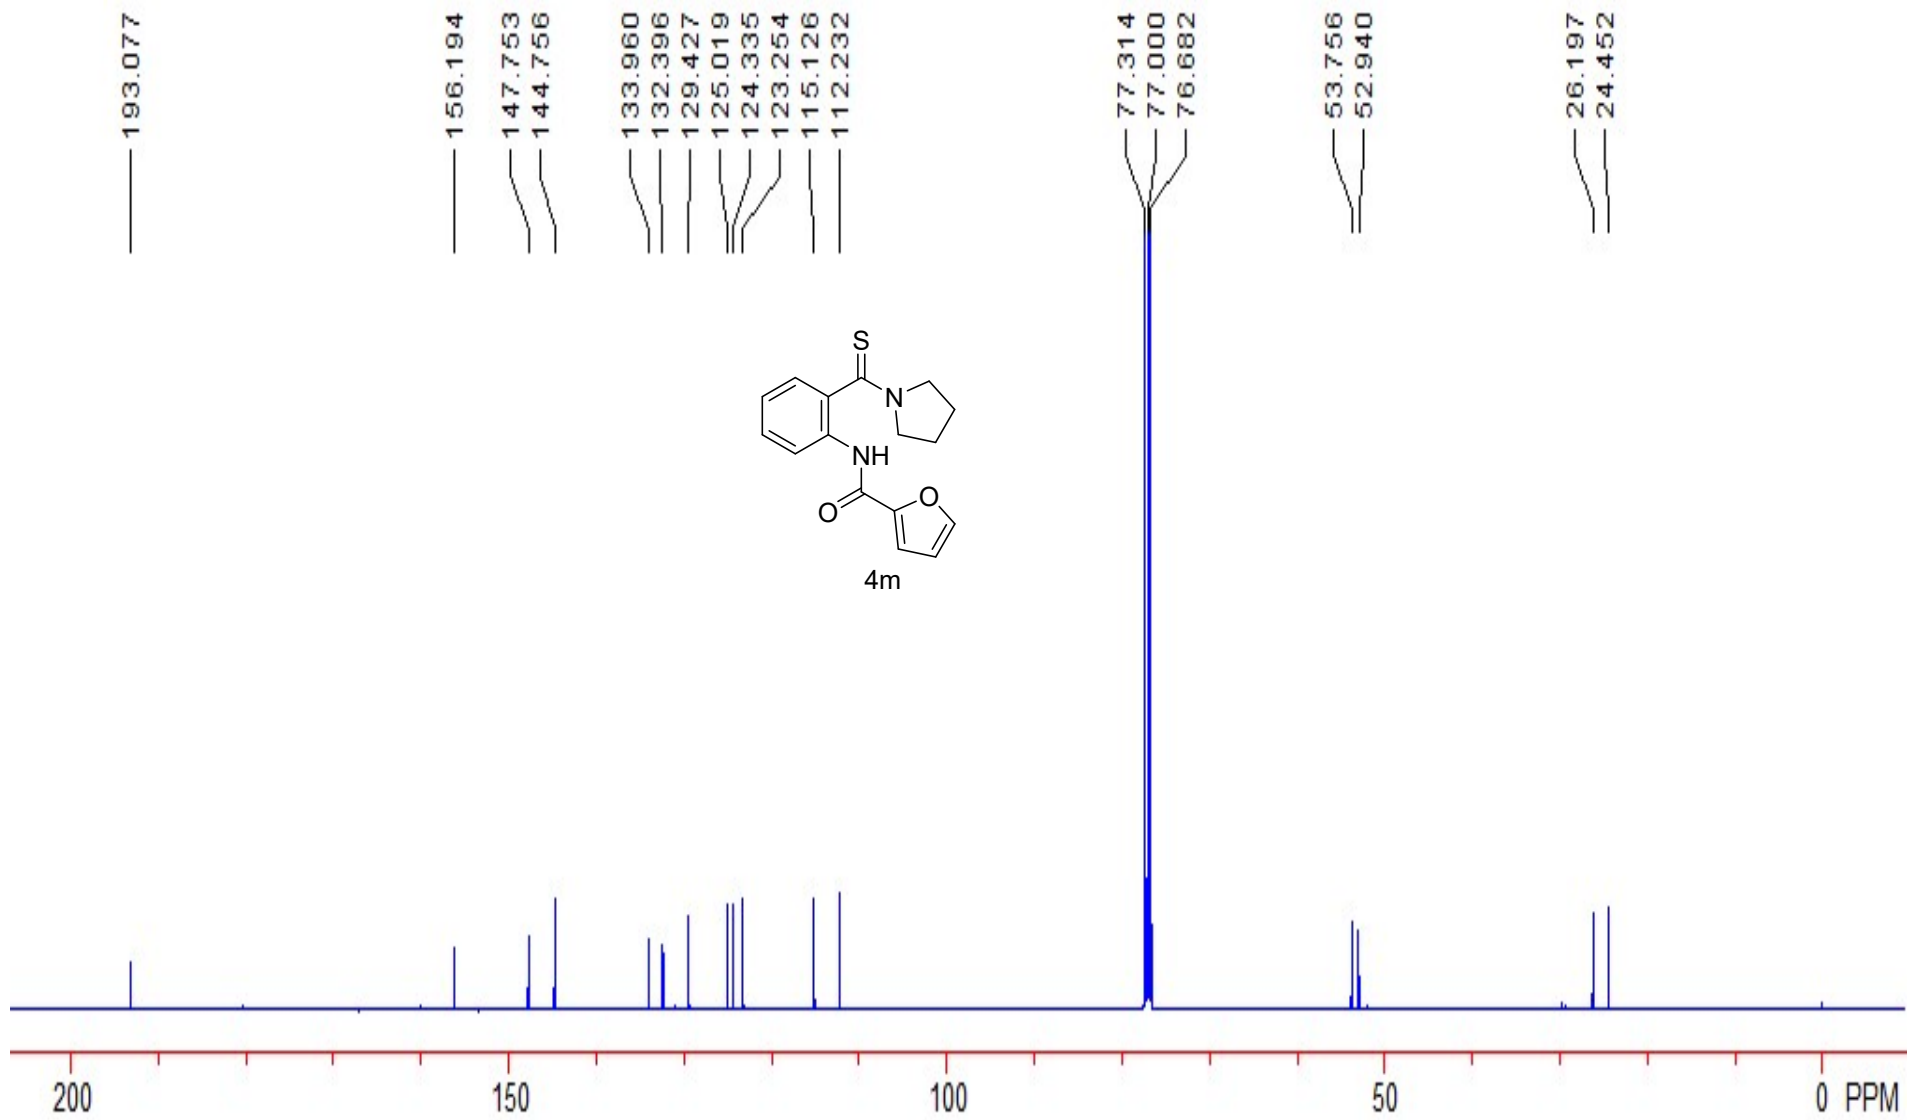

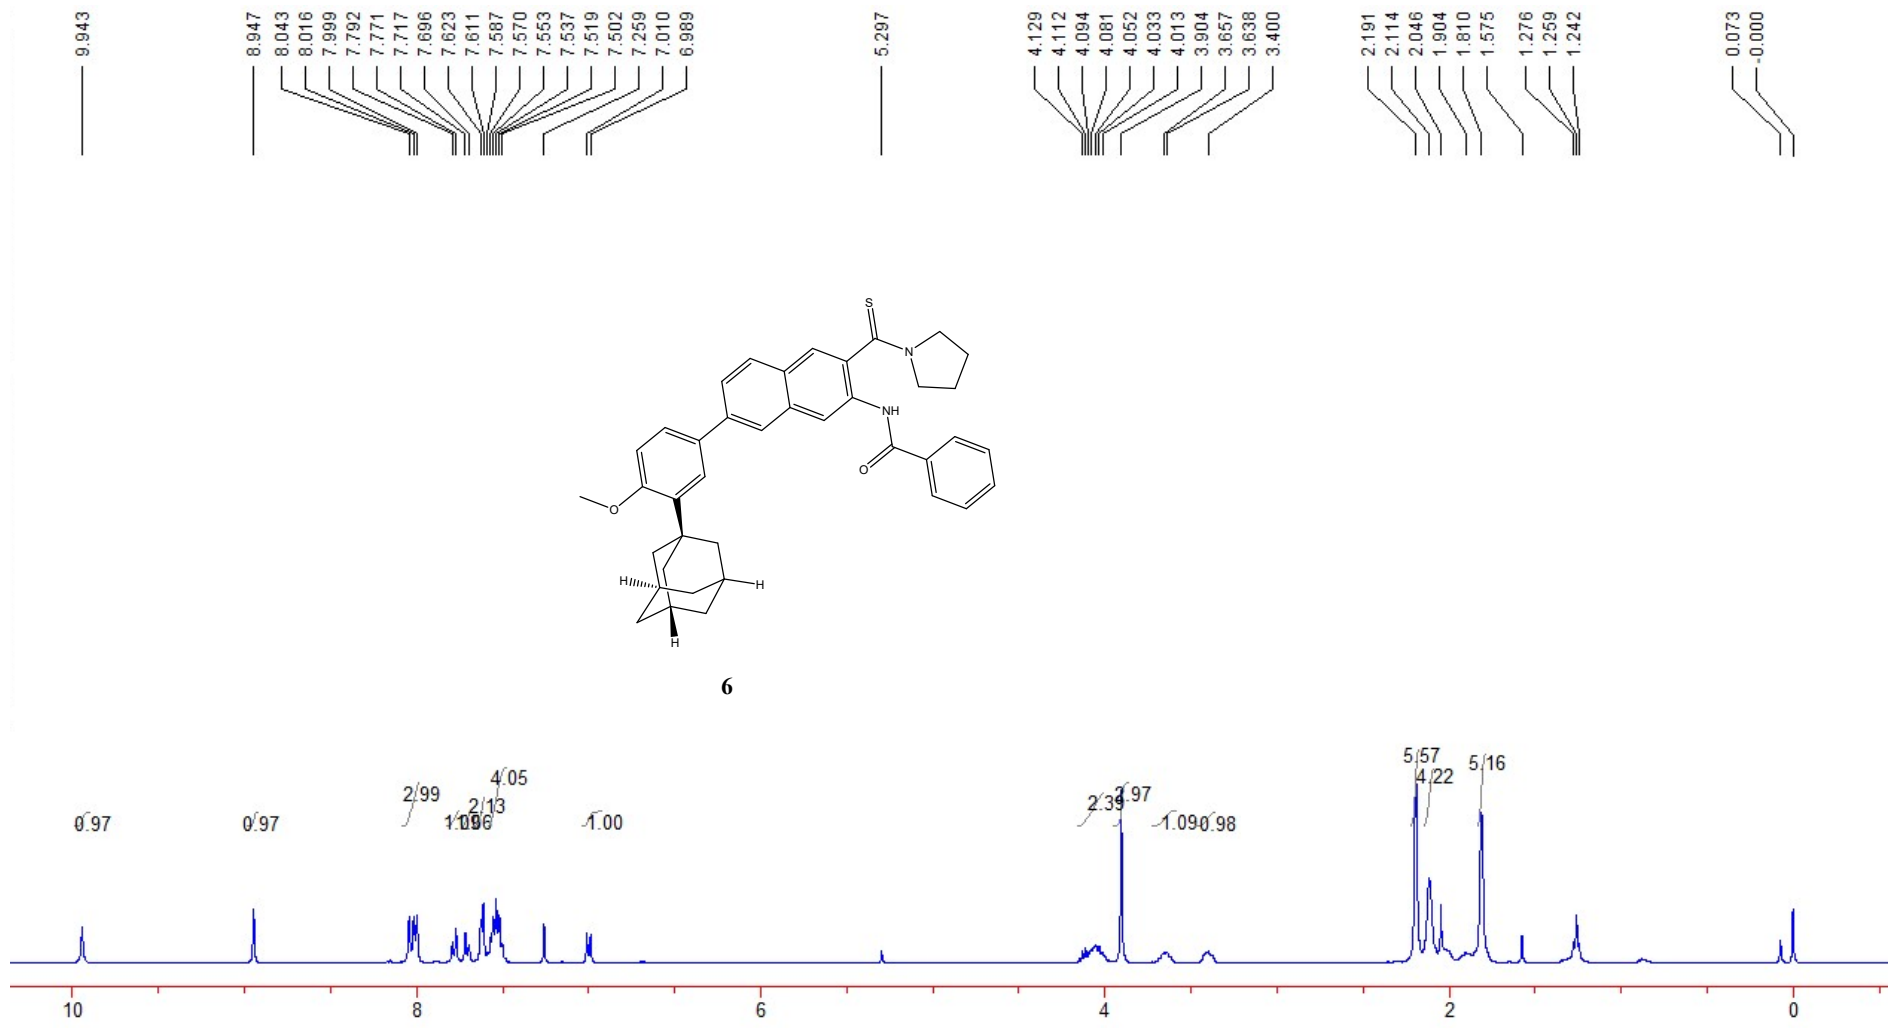

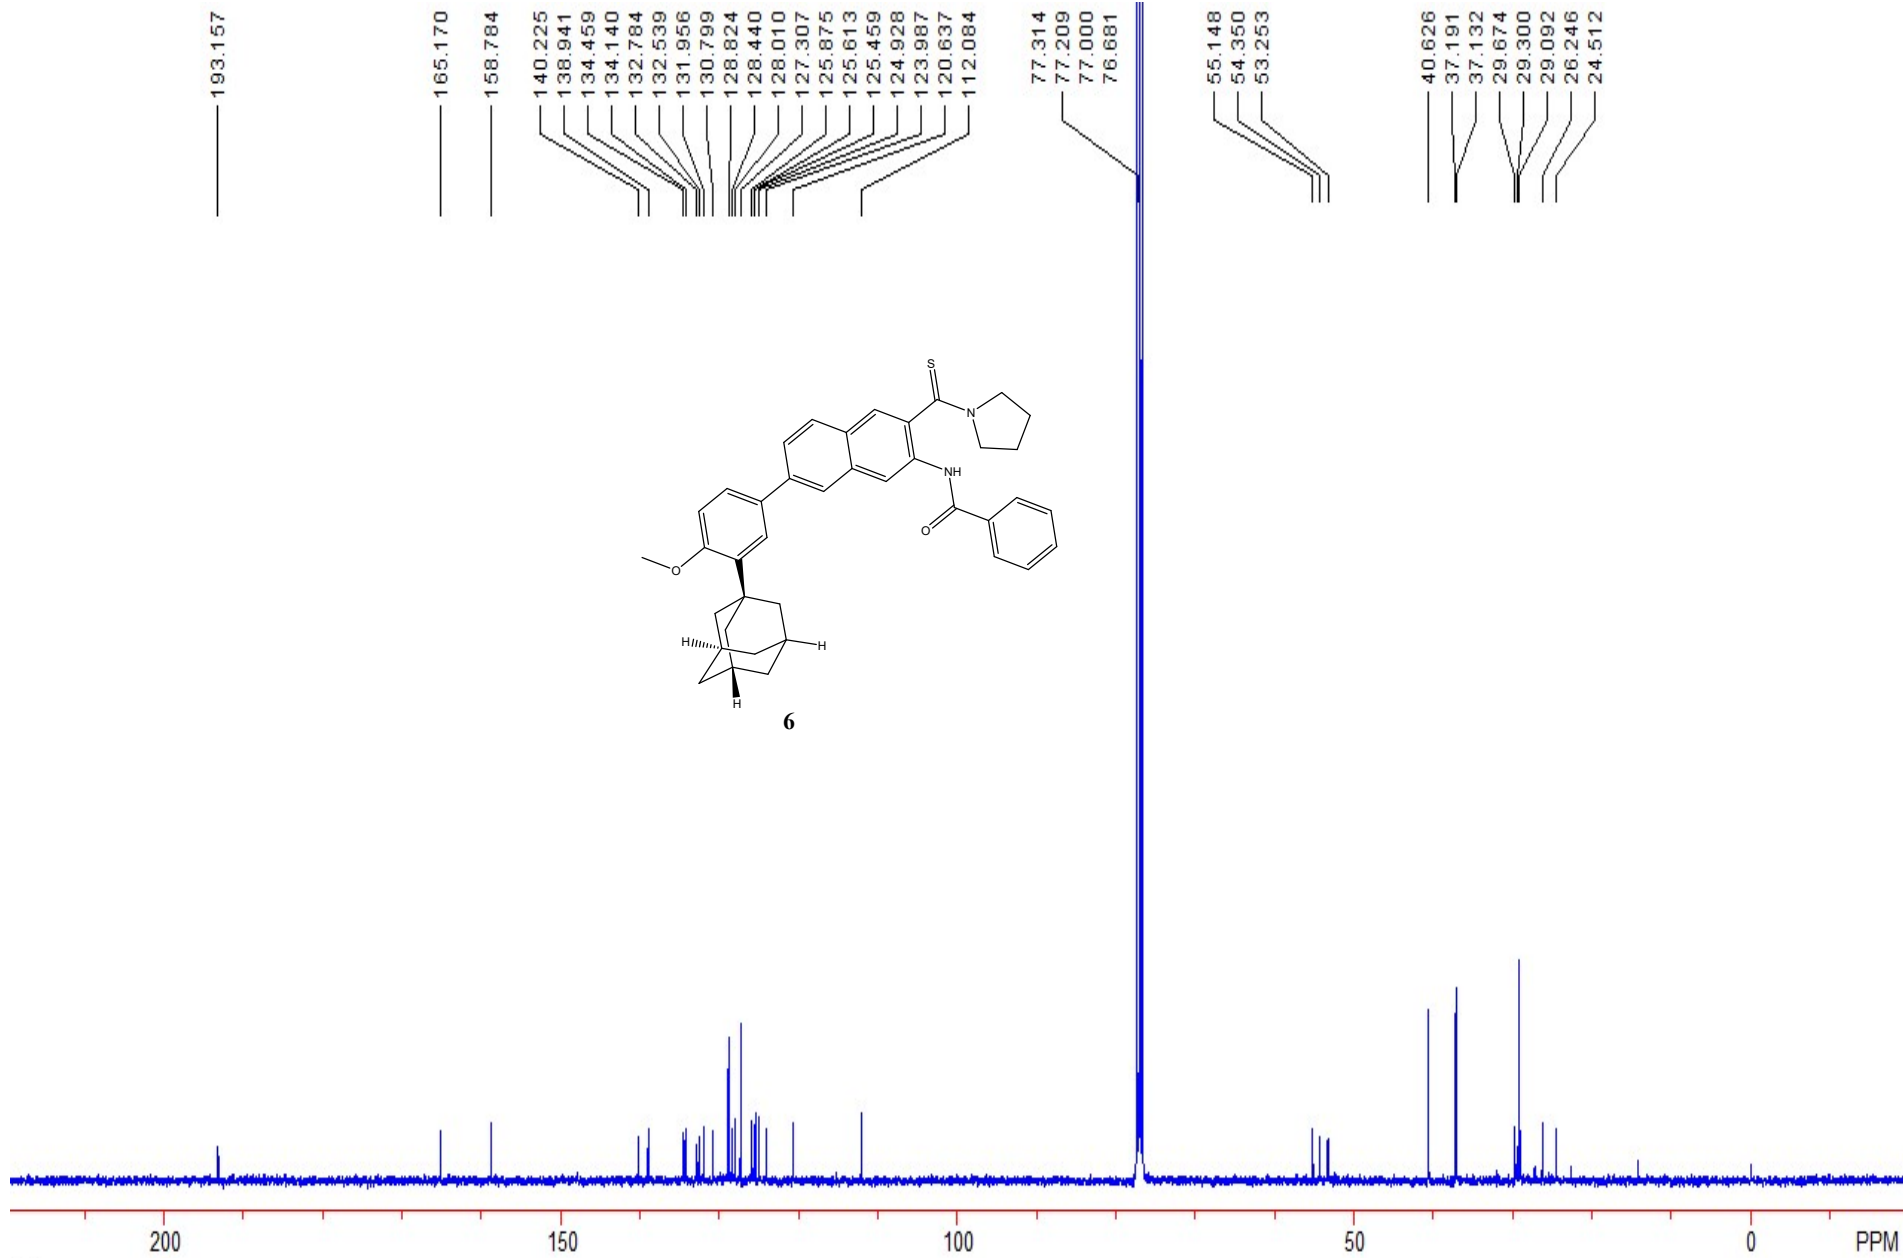

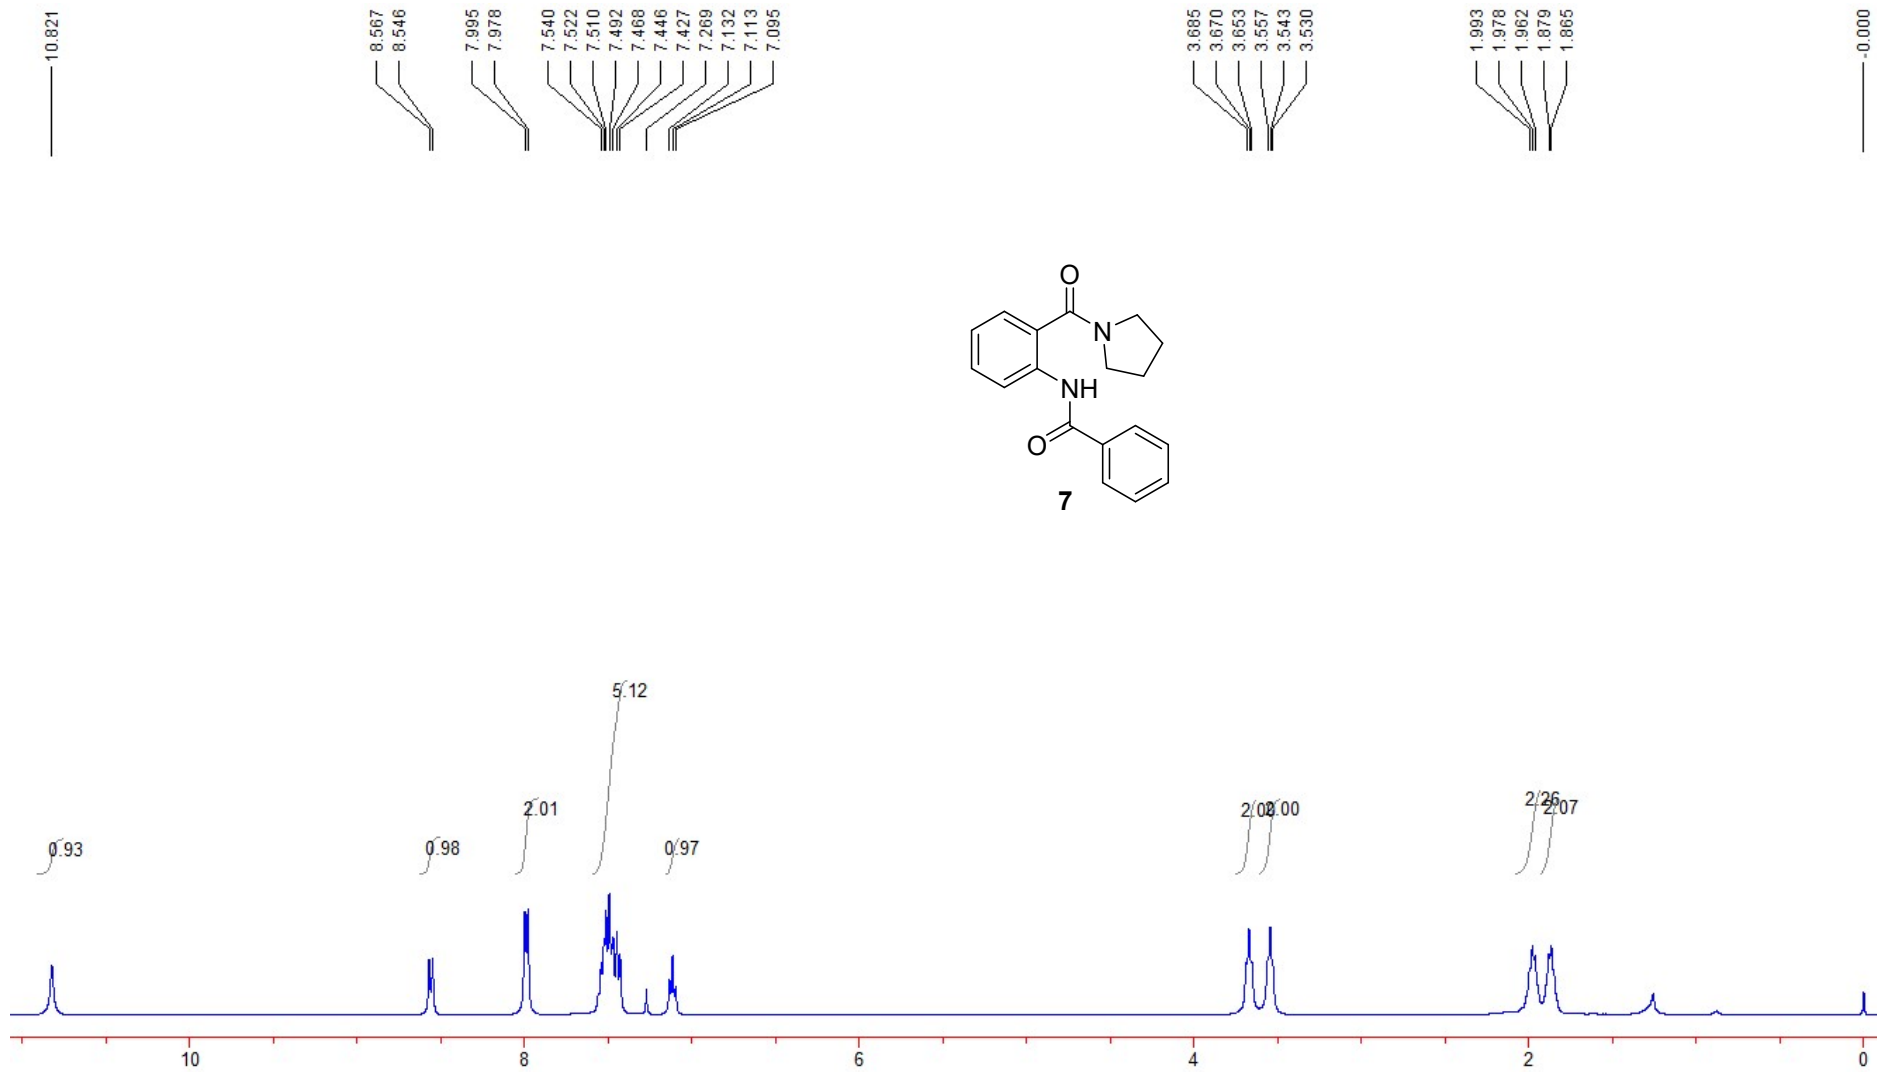



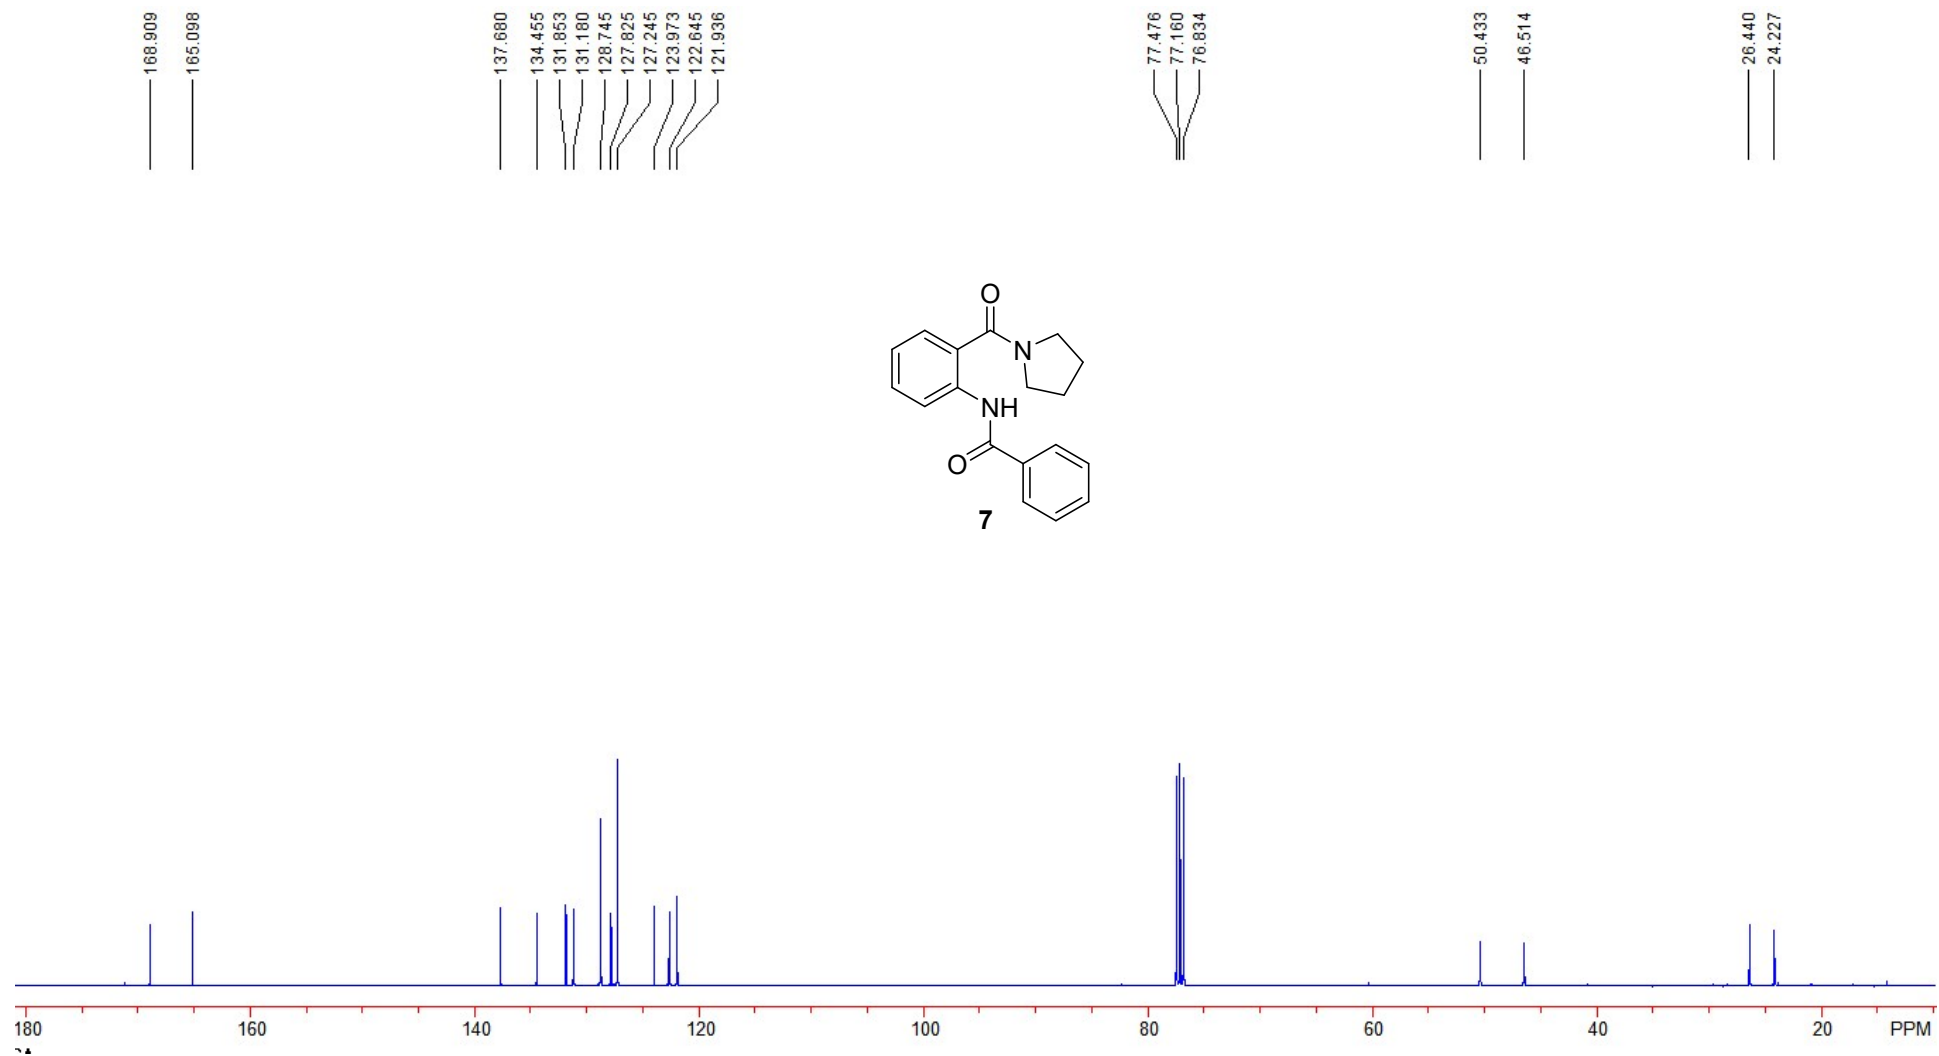

Supplement: d1ob02034j1.pdf [file d1ob02034j1.pdf]
